# Supplementary material for: Transcriptome-wide identification of 5-methylcytosine by deaminase and reader protein-assisted sequencing
Source: eLife journal article supplement (doi:10.7554/elife.98166), 2024-06-11
Supplement: fig2-data1 [file elife-98166-fig2-data1-v1.zip]

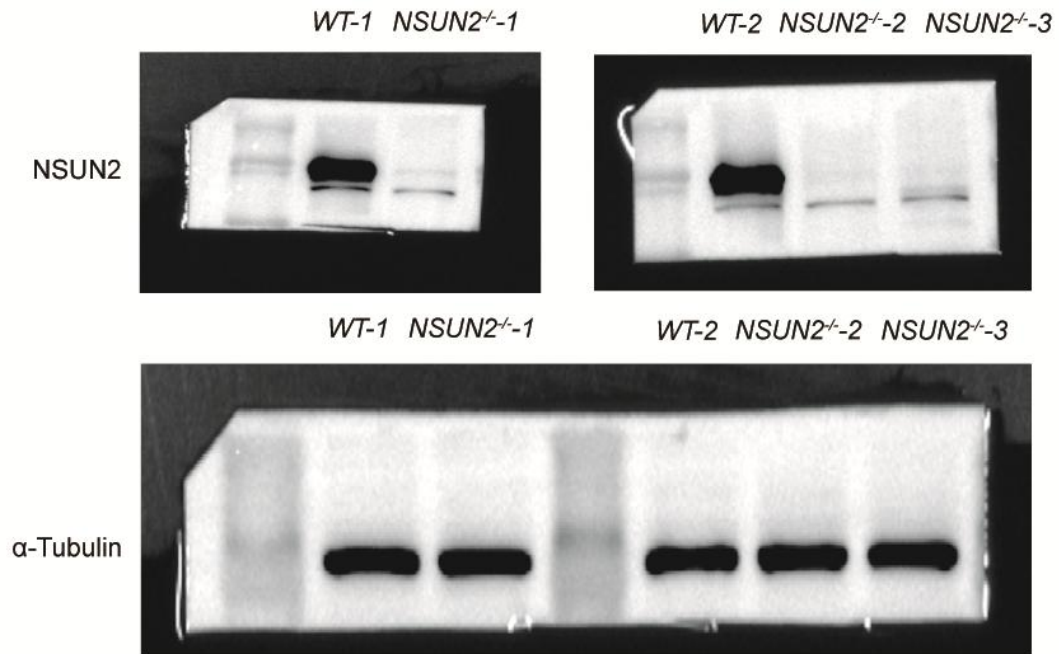

Note: the original western blots for Figure 2E are the WT-1 and NSUN2<sup>-/-</sup>-1 samples in the above figure.

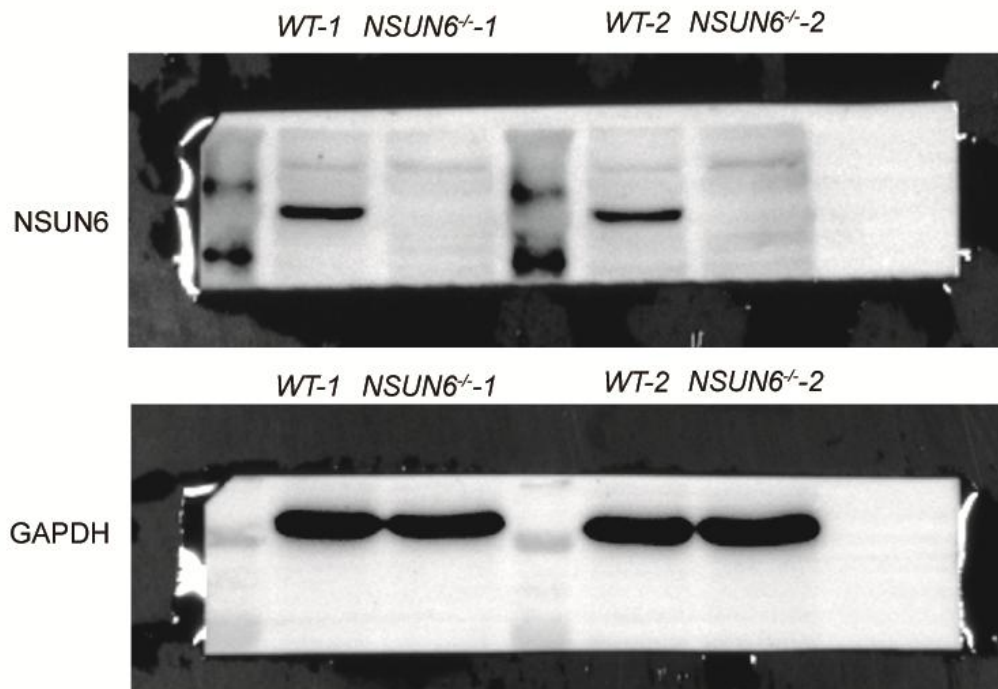

Note: the original western blots for Figure 2F are the WT-1 and NSUN6<sup>-/-</sup>-1 samples in the above figure.
