# Supplementary material for: Transcriptome-wide identification of 5-methylcytosine by deaminase and reader protein-assisted sequencing
Source: eLife. 2025 Apr 8;13:RP98166. doi: 10.7554/eLife.98166 (PMC11978299; doi:10.7554/eLife.98166)
Supplement: Supplementary file 2. [file elife-98166-supp2.xlsx]

## Sheet: DRAM editing cites
Supplementary file2: High-confidence editing sites of DRAM-seq
Chr	start	end	Gene	Mutation type	Mutation rates	stand
1	14555	14556	WASH7P	A/I	0.2107	-
1	14635	14636	WASH7P	A/I	0.1607	-
1	14641	14642	WASH7P	A/I	0.1162	-
1	14696	14697	WASH7P	A/I	0.1115	-
1	14735	14736	WASH7P	A/I	0.22	-
1	16655	16656	WASH7P	A/I	0.2388	-
1	16859	16860	WASH7P	A/I	0.1499	-
1	16951	16952	WASH7P	A/I	0.3776	-
1	17325	17326	WASH7P	A/I	0.1634	-
1	17356	17357	WASH7P	A/I	0.187	-
1	17365	17366	WASH7P	A/I	0.1134	-
1	17711	17712	WASH7P	A/I	0.1578	-
1	228482	228483	AP006222.2	A/I	0.213	-
1	228507	228508	AP006222.2	A/I	0.1615	-
1	228556	228557	AP006222.2	A/I	0.1781	-
1	228598	228599	AP006222.2	A/I	0.2986	-
1	471012	471013	RP4-669L17.1	A/I	0.3125	+
1	471028	471029	RP4-669L17.1	A/I	0.2631	+
1	471033	471034	RP4-669L17.1	A/I	0.1922	+
1	471037	471038	RP4-669L17.1	A/I	0.247	+
1	471173	471174	RP4-669L17.1	A/I	0.1978	+
1	471210	471211	RP4-669L17.1	A/I	0.3327	+
1	763153	763154	LINC01128	A/I	0.265	+
1	865702	865703	SAMD11	A/I	0.223	+
1	871178	871179	SAMD11	A/I	0.1772	+
1	874708	874709	SAMD11	A/I	0.204	+
1	879912	879913	NOC2L	A/I	0.3357	-
1	879938	879939	NOC2L	A/I	0.2692	-
1	879942	879943	NOC2L	A/I	0.3165	-
1	879945	879946	NOC2L	A/I	0.2336	-
1	879963	879964	NOC2L	A/I	0.1259	-
1	880027	880028	NOC2L	A/I	0.2282	-
1	880049	880050	NOC2L	A/I	0.1846	-
1	880134	880135	NOC2L	A/I	0.1746	-
1	881613	881614	NOC2L	A/I	0.1239	-
1	881836	881837	NOC2L	A/I	0.2678	-
1	881887	881888	NOC2L	A/I	0.2429	-
1	883581	883582	NOC2L	A/I	0.122	-
1	883958	883959	NOC2L	A/I	0.1702	-
1	887822	887823	NOC2L	A/I	0.1252	-
1	887949	887950	NOC2L	A/I	0.1457	-
1	887963	887964	NOC2L	A/I	0.2266	-
1	889172	889173	NOC2L	A/I	0.1232	-
1	889217	889218	NOC2L	A/I	0.1869	-
1	891309	891310	NOC2L	A/I	0.1747	-
1	891354	891355	NOC2L	A/I	0.1217	-
1	891375	891376	NOC2L	A/I	0.1996	-
1	891387	891388	NOC2L	A/I	0.2257	-
1	891559	891560	NOC2L	A/I	0.3153	-
1	892645	892646	NOC2L	A/I	0.3083	-
1	894333	894334	NOC2L	A/I	0.1203	-
1	897270	897271	KLHL17	A/I	0.2327	+
1	897371	897372	KLHL17	A/I	0.2708	+
1	900517	900518	KLHL17	A/I	0.3216	+
1	900594	900595	KLHL17	A/I	0.4241	+
1	934586	934587	HES4	A/I	0.1614	-
1	935076	935077	HES4	A/I	0.1074	-
1	935077	935078	HES4	A/I	0.1183	-
1	935124	935125	HES4	A/I	0.2317	-
1	949475	949476	ISG15	A/I	0.1963	+
1	984372	984373	AGRN	A/I	0.4066	+
1	1018064	1018065	C1orf159	A/I	0.3077	-
1	1152447	1152448	SDF4	A/I	0.2049	-
1	1152464	1152465	SDF4	A/I	0.1558	-
1	1152469	1152470	SDF4	A/I	0.3209	-
1	1152475	1152476	SDF4	A/I	0.2958	-
1	1152478	1152479	SDF4	A/I	0.2665	-
1	1152904	1152905	SDF4	A/I	0.1087	-
1	1153905	1153906	SDF4	A/I	0.1096	-
1	1167356	1167357	SDF4	A/I	0.1474	-
1	1167360	1167361	SDF4	A/I	0.2161	-
1	1167363	1167364	SDF4	A/I	0.3191	-
1	1167378	1167379	SDF4	A/I	0.2124	-
1	1189679	1189680	UBE2J2	A/I	0.1623	-
1	1189705	1189706	UBE2J2	A/I	0.1478	-
1	1189707	1189708	UBE2J2	A/I	0.1727	-
1	1189772	1189773	UBE2J2	A/I	0.1752	-
1	1189850	1189851	UBE2J2	A/I	0.2234	-
1	1189928	1189929	UBE2J2	A/I	0.4875	-
1	1190280	1190281	UBE2J2	A/I	0.1893	-
1	1192477	1192478	UBE2J2	A/I	0.146	-
1	1208801	1208802	UBE2J2	A/I	0.3417	-
1	1208977	1208978	UBE2J2	A/I	0.2986	-
1	1228270	1228271	ACAP3	A/I	0.3554	-
1	1228633	1228634	ACAP3	A/I	0.2861	-
1	1228894	1228895	ACAP3	A/I	0.1982	-
1	1230187	1230188	ACAP3	A/I	0.2771	-
1	1230916	1230917	ACAP3	A/I	0.2389	-
1	1235401	1235402	ACAP3	A/I	0.2651	-
1	1244072	1244073	PUSL1	A/I	0.1171	+
1	1247145	1247146	CPSF3L	A/I	0.1795	-
1	1247480	1247481	CPSF3L	A/I	0.1565	-
1	1247654	1247655	CPSF3L	A/I	0.2049	-
1	1247659	1247660	CPSF3L	A/I	0.1775	-
1	1247862	1247863	CPSF3L	A/I	0.1084	-
1	1248012	1248013	CPSF3L	A/I	0.2797	-
1	1248067	1248068	CPSF3L	A/I	0.1414	-
1	1248303	1248304	CPSF3L	A/I	0.19	-
1	1250288	1250289	CPSF3L	A/I	0.1804	-
1	1250808	1250809	CPSF3L	A/I	0.1422	-
1	1250810	1250811	CPSF3L	A/I	0.1633	-
1	1250966	1250967	CPSF3L	A/I	0.2741	-
1	1254768	1254769	CPSF3L	A/I	0.1377	-
1	1254830	1254831	CPSF3L	A/I	0.115	-
1	1270996	1270997	DVL1	A/I	0.1707	-
1	1271007	1271008	DVL1	A/I	0.1146	-
1	1271250	1271251	DVL1	A/I	0.1836	-
1	1271655	1271656	DVL1	A/I	0.1967	-
1	1271700	1271701	DVL1	A/I	0.2034	-
1	1273395	1273396	DVL1	A/I	0.1543	-
1	1288349	1288350	MXRA8	A/I	0.3832	-
1	1288427	1288428	MXRA8	A/I	0.1406	-
1	1288452	1288453	MXRA8	A/I	0.302	-
1	1288470	1288471	MXRA8	A/I	0.1641	-
1	1288473	1288474	MXRA8	A/I	0.264	-
1	1288552	1288553	MXRA8	A/I	0.1231	-
1	1288634	1288635	MXRA8	A/I	0.2718	-
1	1288662	1288663	MXRA8	A/I	0.2575	-
1	1288801	1288802	MXRA8	A/I	0.4122	-
1	1288848	1288849	MXRA8	A/I	0.183	-
1	1288984	1288985	MXRA8	A/I	0.1818	-
1	1288988	1288989	MXRA8	A/I	0.2803	-
1	1289244	1289245	MXRA8	A/I	0.2	-
1	1289304	1289305	MXRA8	A/I	0.3662	-
1	1289475	1289476	MXRA8	A/I	0.2576	-
1	1289602	1289603	MXRA8	A/I	0.4451	-
1	1289745	1289746	MXRA8	A/I	0.2535	-
1	1290165	1290166	MXRA8	A/I	0.1501	-
1	1290177	1290178	MXRA8	A/I	0.3217	-
1	1290201	1290202	MXRA8	A/I	0.1701	-
1	1290695	1290696	MXRA8	A/I	0.136	-
1	1290697	1290698	MXRA8	A/I	0.2581	-
1	1290930	1290931	MXRA8	A/I	0.4477	-
1	1309764	1309765	AURKAIP1	A/I	0.129	-
1	1322342	1322343	CCNL2	A/I	0.1591	-
1	1322367	1322368	CCNL2	A/I	0.1633	-
1	1322438	1322439	CCNL2	A/I	0.155	-
1	1322487	1322488	CCNL2	A/I	0.1921	-
1	1322488	1322489	CCNL2	A/I	0.115	-
1	1322490	1322491	CCNL2	A/I	0.1166	-
1	1322663	1322664	CCNL2	A/I	0.146	-
1	1322671	1322672	CCNL2	A/I	0.3074	-
1	1322704	1322705	CCNL2	A/I	0.2158	-
1	1322707	1322708	CCNL2	A/I	0.3211	-
1	1322710	1322711	CCNL2	A/I	0.169	-
1	1322738	1322739	CCNL2	A/I	0.2473	-
1	1322927	1322928	CCNL2	A/I	0.1221	-
1	1323160	1323161	CCNL2	A/I	0.1434	-
1	1323424	1323425	CCNL2	A/I	0.1789	-
1	1330775	1330776	CCNL2	A/I	0.1761	-
1	1330838	1330839	CCNL2	A/I	0.2143	-
1	1330856	1330857	CCNL2	A/I	0.2182	-
1	1333683	1333684	CCNL2	A/I	0.2573	-
1	1333685	1333686	CCNL2	A/I	0.1863	-
1	1333986	1333987	CCNL2	A/I	0.1769	-
1	1334467	1334468	CCNL2	A/I	0.1736	-
1	1334475	1334476	CCNL2	A/I	0.2732	-
1	1334547	1334548	CCNL2	A/I	0.3456	-
1	1334602	1334603	CCNL2	A/I	0.227	-
1	1334614	1334615	CCNL2	A/I	0.1664	-
1	1337387	1337388	MRPL20	A/I	0.1143	-
1	1342603	1342604	MRPL20	A/I	0.2644	-
1	1345001	1345002	RP4-758J18.13	A/I	0.3818	+
1	1345062	1345063	RP4-758J18.13	A/I	0.3725	+
1	1345554	1345555	RP4-758J18.13	A/I	0.3473	+
1	1345672	1345673	RP4-758J18.13	A/I	0.2485	+
1	1345714	1345715	RP4-758J18.13	A/I	0.3707	+
1	1391632	1391633	ATAD3C	A/I	0.1333	+
1	1391715	1391716	ATAD3C	A/I	0.183	+
1	1412656	1412657	ATAD3B	A/I	0.2072	+
1	1412716	1412717	ATAD3B	A/I	0.1668	+
1	1414027	1414028	ATAD3B	A/I	0.121	+
1	1414053	1414054	ATAD3B	A/I	0.2035	+
1	1414117	1414118	ATAD3B	A/I	0.1254	+
1	1414438	1414439	ATAD3B	A/I	0.181	+
1	1414441	1414442	ATAD3B	A/I	0.1495	+
1	1416269	1416270	ATAD3B	A/I	0.1269	+
1	1421567	1421568	ATAD3B	A/I	0.1583	+
1	1421951	1421952	ATAD3B	A/I	0.2263	+
1	1422034	1422035	ATAD3B	A/I	0.2639	+
1	1424591	1424592	ATAD3B	A/I	0.335	+
1	1425728	1425729	ATAD3B	A/I	0.1303	+
1	1425968	1425969	ATAD3B	A/I	0.113	+
1	1430949	1430950	ATAD3B	A/I	0.1937	+
1	1447666	1447667	ATAD3A	A/I	0.1552	+
1	1447669	1447670	ATAD3A	A/I	0.2453	+
1	1447781	1447782	ATAD3A	A/I	0.1431	+
1	1451394	1451395	ATAD3A	A/I	0.1813	+
1	1451419	1451420	ATAD3A	A/I	0.3032	+
1	1451454	1451455	ATAD3A	A/I	0.1836	+
1	1452694	1452695	ATAD3A	A/I	0.128	+
1	1452720	1452721	ATAD3A	A/I	0.2277	+
1	1452784	1452785	ATAD3A	A/I	0.1354	+
1	1453105	1453106	ATAD3A	A/I	0.1622	+
1	1453108	1453109	ATAD3A	A/I	0.1437	+
1	1454323	1454324	ATAD3A	A/I	0.1294	+
1	1458157	1458158	ATAD3A	A/I	0.154	+
1	1459253	1459254	ATAD3A	A/I	0.2122	+
1	1459680	1459681	ATAD3A	A/I	0.1884	+
1	1459763	1459764	ATAD3A	A/I	0.2483	+
1	1463135	1463136	ATAD3A	A/I	0.197	+
1	1469390	1469391	ATAD3A	A/I	0.3025	+
1	1469530	1469531	ATAD3A	A/I	0.2158	+
1	1469636	1469637	ATAD3A	A/I	0.1356	+
1	1469697	1469698	ATAD3A	A/I	0.1341	+
1	1469757	1469758	ATAD3A	A/I	0.1218	+
1	1469832	1469833	ATAD3A	A/I	0.1564	+
1	1469834	1469835	ATAD3A	A/I	0.2016	+
1	1469933	1469934	ATAD3A	A/I	0.1377	+
1	1479351	1479352	SSU72	A/I	0.1116	-
1	1498211	1498212	SSU72	A/I	0.1812	-
1	1498234	1498235	SSU72	A/I	0.2459	-
1	1498476	1498477	SSU72	A/I	0.322	-
1	1498621	1498622	SSU72	A/I	0.2258	-
1	1498656	1498657	SSU72	A/I	0.3474	-
1	1499131	1499132	SSU72	A/I	0.1859	-
1	1500012	1500013	SSU72	A/I	0.3116	-
1	1500129	1500130	SSU72	A/I	0.2334	-
1	1500212	1500213	SSU72	A/I	0.1613	-
1	1500293	1500294	SSU72	A/I	0.1094	-
1	1533746	1533747	C1orf233	A/I	0.375	-
1	1533769	1533770	C1orf233	A/I	0.3009	-
1	1560764	1560765	MIB2	A/I	0.3207	+
1	1562542	1562543	MIB2	A/I	0.2659	+
1	1564603	1564604	MIB2	A/I	0.2675	+
1	1564669	1564670	MIB2	A/I	0.232	+
1	1565769	1565770	MIB2	A/I	0.2124	+
1	1570822	1570823	CDK11B	A/I	0.214	-
1	1570974	1570975	CDK11B	A/I	0.2329	-
1	1570988	1570989	CDK11B	A/I	0.3065	-
1	1577035	1577036	CDK11B	A/I	0.1555	-
1	1580545	1580546	CDK11B	A/I	0.1142	-
1	1594974	1594975	SLC35E2B	A/I	0.2777	-
1	1596195	1596196	SLC35E2B	A/I	0.2922	-
1	1607571	1607572	SLC35E2B	A/I	0.3262	-
1	1634194	1634195	CDK11A	A/I	0.2321	-
1	1634200	1634201	CDK11A	A/I	0.2928	-
1	1634208	1634209	CDK11A	A/I	0.2735	-
1	1634289	1634290	CDK11A	A/I	0.1976	-
1	1634798	1634799	CDK11A	A/I	0.1802	-
1	1634963	1634964	CDK11A	A/I	0.1521	-
1	1635041	1635042	CDK11A	A/I	0.1875	-
1	1636176	1636177	CDK11A	A/I	0.4053	-
1	1636207	1636208	CDK11A	A/I	0.3575	-
1	1636224	1636225	CDK11A	A/I	0.2058	-
1	1636226	1636227	CDK11A	A/I	0.2255	-
1	1636228	1636229	CDK11A	A/I	0.3154	-
1	1636241	1636242	CDK11A	A/I	0.3369	-
1	1636257	1636258	CDK11A	A/I	0.2515	-
1	1639676	1639677	CDK11A	A/I	0.1174	-
1	1640570	1640571	CDK11A	A/I	0.1557	-
1	1654161	1654162	CDK11A	A/I	0.1907	-
1	1683135	1683136	NADK	A/I	0.1458	-
1	1683146	1683147	NADK	A/I	0.1565	-
1	1683539	1683540	NADK	A/I	0.1404	-
1	1683545	1683546	NADK	A/I	0.2396	-
1	1683599	1683600	NADK	A/I	0.1957	-
1	1683654	1683655	NADK	A/I	0.2241	-
1	1683658	1683659	NADK	A/I	0.1893	-
1	1683667	1683668	NADK	A/I	0.1607	-
1	1683693	1683694	NADK	A/I	0.2235	-
1	1683706	1683707	NADK	A/I	0.1852	-
1	1683970	1683971	NADK	A/I	0.1669	-
1	1683973	1683974	NADK	A/I	0.1877	-
1	1684001	1684002	NADK	A/I	0.1433	-
1	1684043	1684044	NADK	A/I	0.1597	-
1	1684173	1684174	NADK	A/I	0.2124	-
1	1684330	1684331	NADK	A/I	0.1087	-
1	1684406	1684407	NADK	A/I	0.1547	-
1	1684485	1684486	NADK	A/I	0.2443	-
1	1684488	1684489	NADK	A/I	0.1936	-
1	1685026	1685027	NADK	A/I	0.136	-
1	1685055	1685056	NADK	A/I	0.2283	-
1	1685560	1685561	NADK	A/I	0.1336	-
1	1685587	1685588	NADK	A/I	0.2143	-
1	1685610	1685611	NADK	A/I	0.2819	-
1	1685617	1685618	NADK	A/I	0.1328	-
1	1685986	1685987	NADK	A/I	0.2047	-
1	1686827	1686828	NADK	A/I	0.1619	-
1	1687715	1687716	NADK	A/I	0.1829	-
1	1688045	1688046	NADK	A/I	0.1608	-
1	1688680	1688681	NADK	A/I	0.1566	-
1	1688707	1688708	NADK	A/I	0.1187	-
1	1688708	1688709	NADK	A/I	0.118	-
1	1696847	1696848	NADK	A/I	0.1808	-
1	1709813	1709814	NADK	A/I	0.1915	-
1	1716909	1716910	GNB1	A/I	0.1154	-
1	1716959	1716960	GNB1	A/I	0.1084	-
1	1717154	1717155	GNB1	A/I	0.1769	-
1	1717394	1717395	GNB1	A/I	0.1406	-
1	1717555	1717556	GNB1	A/I	0.1516	-
1	1717660	1717661	GNB1	A/I	0.1349	-
1	1717663	1717664	GNB1	A/I	0.117	-
1	1718430	1718431	GNB1	A/I	0.1397	-
1	1718860	1718861	GNB1	A/I	0.156	-
1	1724746	1724747	GNB1	A/I	0.2665	-
1	1735858	1735859	GNB1	A/I	0.1667	-
1	1735860	1735861	GNB1	A/I	0.1348	-
1	1737926	1737927	GNB1	A/I	0.1609	-
1	1747221	1747222	GNB1	A/I	0.1172	-
1	1756871	1756872	GNB1	A/I	0.1641	-
1	1756932	1756933	GNB1	A/I	0.1089	-
1	2082243	2082244	PRKCZ	A/I	0.1925	+
1	2100976	2100977	PRKCZ	A/I	0.1588	+
1	2103791	2103792	PRKCZ	A/I	0.1593	+
1	2116491	2116492	PRKCZ	A/I	0.1568	+
1	2116497	2116498	PRKCZ	A/I	0.153	+
1	2121027	2121028	C1orf86	A/I	0.2159	-
1	2125312	2125313	C1orf86	A/I	0.1308	-
1	2125457	2125458	C1orf86	A/I	0.1213	-
1	2125505	2125506	C1orf86	A/I	0.1282	-
1	2160650	2160651	SKI	A/I	0.1741	+
1	2237678	2237679	SKI	A/I	0.1566	+
1	2238804	2238805	SKI	A/I	0.1125	+
1	2323383	2323384	RER1	A/I	0.1513	+
1	2330939	2330940	RER1	A/I	0.1762	+
1	2333757	2333758	RER1	A/I	0.1651	+
1	2334503	2334504	RER1	A/I	0.233	+
1	2334616	2334617	RER1	A/I	0.1363	+
1	2334639	2334640	RER1	A/I	0.1071	+
1	2334676	2334677	RER1	A/I	0.1054	+
1	2334708	2334709	RER1	A/I	0.2009	+
1	2335016	2335017	RER1	A/I	0.1146	+
1	2335041	2335042	RER1	A/I	0.1561	+
1	2335135	2335136	RER1	A/I	0.241	+
1	2335139	2335140	RER1	A/I	0.1133	+
1	2335334	2335335	RER1	A/I	0.1972	+
1	2335392	2335393	RER1	A/I	0.2613	+
1	2335406	2335407	RER1	A/I	0.1351	+
1	2335419	2335420	RER1	A/I	0.1589	+
1	2335443	2335444	RER1	A/I	0.1502	+
1	2335529	2335530	RER1	A/I	0.1114	+
1	2335772	2335773	RER1	A/I	0.1458	+
1	2335840	2335841	RER1	A/I	0.2362	+
1	2335851	2335852	RER1	A/I	0.1087	+
1	2336005	2336006	RER1	A/I	0.2075	+
1	2336077	2336078	RER1	A/I	0.2046	+
1	2336110	2336111	RER1	A/I	0.2598	+
1	2336202	2336203	RER1	A/I	0.1689	+
1	2336205	2336206	RER1	A/I	0.1572	+
1	2336242	2336243	RER1	A/I	0.2143	+
1	2336318	2336319	RER1	A/I	0.1389	+
1	2336358	2336359	RER1	A/I	0.1424	+
1	2336554	2336555	RER1	A/I	0.1386	+
1	2336743	2336744	RER1	A/I	0.1203	+
1	2336923	2336924	PEX10	A/I	0.1799	-
1	2337166	2337167	PEX10	A/I	0.1659	-
1	2337211	2337212	PEX10	A/I	0.2742	-
1	2339895	2339896	PEX10	A/I	0.1895	-
1	2339957	2339958	PEX10	A/I	0.193	-
1	2339986	2339987	PEX10	A/I	0.2041	-
1	2340033	2340034	PEX10	A/I	0.1834	-
1	2340123	2340124	PEX10	A/I	0.3024	-
1	2340238	2340239	PEX10	A/I	0.297	-
1	2340272	2340273	PEX10	A/I	0.1946	-
1	2445832	2445833	PANK4	A/I	0.163	-
1	2450640	2450641	PANK4	A/I	0.1842	-
1	2450657	2450658	PANK4	A/I	0.1923	-
1	2450675	2450676	PANK4	A/I	0.1577	-
1	3545040	3545041	TPRG1L	A/I	0.1912	+
1	3546521	3546522	TPRG1L	A/I	0.1027	+
1	3546569	3546570	TPRG1L	A/I	0.2717	+
1	3547504	3547505	WRAP73	A/I	0.1222	-
1	3547708	3547709	WRAP73	A/I	0.2667	-
1	3547731	3547732	WRAP73	A/I	0.3679	-
1	3547851	3547852	WRAP73	A/I	0.1923	-
1	3548026	3548027	WRAP73	A/I	0.1974	-
1	3548854	3548855	WRAP73	A/I	0.1474	-
1	3548873	3548874	WRAP73	A/I	0.2367	-
1	3549964	3549965	WRAP73	A/I	0.126	-
1	3555342	3555343	WRAP73	A/I	0.158	-
1	3564006	3564007	WRAP73	A/I	0.1132	-
1	3564057	3564058	WRAP73	A/I	0.1633	-
1	3564100	3564101	WRAP73	A/I	0.2118	-
1	3566498	3566499	WRAP73	A/I	0.1605	-
1	3696995	3696996	LRRC47	A/I	0.2588	-
1	3697194	3697195	LRRC47	A/I	0.1326	-
1	3697235	3697236	LRRC47	A/I	0.2095	-
1	3699294	3699295	LRRC47	A/I	0.1767	-
1	3703771	3703772	LRRC47	A/I	0.1028	-
1	3703873	3703874	LRRC47	A/I	0.1183	-
1	3712898	3712899	LRRC47	A/I	0.1383	-
1	3712972	3712973	LRRC47	A/I	0.1195	-
1	3747770	3747771	CEP104	A/I	0.1821	-
1	3753210	3753211	CEP104	A/I	0.2609	-
1	3753931	3753932	CEP104	A/I	0.2167	-
1	3753949	3753950	CEP104	A/I	0.2374	-
1	3773578	3773579	CEP104	A/I	0.2568	-
1	3805790	3805791	C1orf174	A/I	0.2562	-
1	3805829	3805830	C1orf174	A/I	0.2319	-
1	3805834	3805835	C1orf174	A/I	0.2852	-
1	3805953	3805954	C1orf174	A/I	0.1568	-
1	3805955	3805956	C1orf174	A/I	0.2588	-
1	3806126	3806127	C1orf174	A/I	0.2004	-
1	3806134	3806135	C1orf174	A/I	0.2238	-
1	3806136	3806137	C1orf174	A/I	0.2789	-
1	3806303	3806304	C1orf174	A/I	0.2367	-
1	3806419	3806420	C1orf174	A/I	0.1366	-
1	3806447	3806448	C1orf174	A/I	0.1149	-
1	3806495	3806496	C1orf174	A/I	0.1008	-
1	3806585	3806586	C1orf174	A/I	0.1058	-
1	3807206	3807207	C1orf174	A/I	0.1101	-
1	3807249	3807250	C1orf174	A/I	0.1325	-
1	3807319	3807320	C1orf174	A/I	0.1395	-
1	3807344	3807345	C1orf174	A/I	0.1594	-
1	3807351	3807352	C1orf174	A/I	0.1032	-
1	3807438	3807439	C1orf174	A/I	0.298	-
1	3807520	3807521	C1orf174	A/I	0.1374	-
1	6245224	6245225	RPL22	A/I	0.1551	-
1	6245283	6245284	RPL22	A/I	0.1	-
1	6245317	6245318	RPL22	A/I	0.1229	-
1	6245635	6245636	RPL22	A/I	0.1052	-
1	6245840	6245841	RPL22	A/I	0.1998	-
1	6245985	6245986	RPL22	A/I	0.1709	-
1	6246527	6246528	RPL22	A/I	0.137	-
1	6246664	6246665	RPL22	A/I	0.1089	-
1	6246782	6246783	RPL22	A/I	0.1335	-
1	6246849	6246850	RPL22	A/I	0.1389	-
1	6257741	6257742	RPL22	A/I	0.1178	-
1	6258854	6258855	RPL22	A/I	0.2497	-
1	6258873	6258874	RPL22	A/I	0.1445	-
1	6258929	6258930	RPL22	A/I	0.2027	-
1	6259006	6259007	RPL22	A/I	0.2875	-
1	6259381	6259382	RPL22	A/I	0.3445	-
1	6259478	6259479	RPL22	A/I	0.148	-
1	6259480	6259481	RPL22	A/I	0.2191	-
1	6259668	6259669	RPL22	A/I	0.2	-
1	6282294	6282295	ICMT	A/I	0.3205	-
1	6282921	6282922	ICMT	A/I	0.17	-
1	6283080	6283081	ICMT	A/I	0.1485	-
1	6283609	6283610	ICMT	A/I	0.1522	-
1	6283657	6283658	ICMT	A/I	0.1059	-
1	6283942	6283943	ICMT	A/I	0.1477	-
1	6284110	6284111	ICMT	A/I	0.1261	-
1	6284867	6284868	ICMT	A/I	0.1911	-
1	6285277	6285278	ICMT	A/I	0.154	-
1	6292041	6292042	ICMT	A/I	0.1362	-
1	6292095	6292096	ICMT	A/I	0.1963	-
1	6293592	6293593	ICMT	A/I	0.1221	-
1	6324515	6324516	ACOT7	A/I	0.1294	-
1	6341210	6341211	ACOT7	A/I	0.1389	-
1	6354947	6354948	ACOT7	A/I	0.1522	-
1	6453458	6453459	ACOT7	A/I	0.25	-
1	6581547	6581548	NOL9	A/I	0.2381	-
1	6581769	6581770	NOL9	A/I	0.1427	-
1	6582497	6582498	NOL9	A/I	0.4091	-
1	6583035	6583036	NOL9	A/I	0.3009	-
1	6583161	6583162	NOL9	A/I	0.3059	-
1	6584029	6584030	NOL9	A/I	0.1746	-
1	6584037	6584038	NOL9	A/I	0.1711	-
1	6584042	6584043	NOL9	A/I	0.1532	-
1	6584321	6584322	NOL9	A/I	0.1112	-
1	6584448	6584449	NOL9	A/I	0.1723	-
1	6584591	6584592	NOL9	A/I	0.1799	-
1	6584614	6584615	NOL9	A/I	0.1678	-
1	6584645	6584646	NOL9	A/I	0.1867	-
1	6585497	6585498	NOL9	A/I	0.2304	-
1	6585696	6585697	NOL9	A/I	0.1862	-
1	6585702	6585703	NOL9	A/I	0.2074	-
1	6585744	6585745	NOL9	A/I	0.1245	-
1	6585768	6585769	NOL9	A/I	0.2424	-
1	6585784	6585785	NOL9	A/I	0.1575	-
1	6585819	6585820	NOL9	A/I	0.1866	-
1	6585947	6585948	NOL9	A/I	0.2081	-
1	6586787	6586788	NOL9	A/I	0.1065	-
1	6589107	6589108	NOL9	A/I	0.1556	-
1	6589109	6589110	NOL9	A/I	0.2748	-
1	6589159	6589160	NOL9	A/I	0.1597	-
1	6589166	6589167	NOL9	A/I	0.1879	-
1	6589168	6589169	NOL9	A/I	0.2154	-
1	6589171	6589172	NOL9	A/I	0.2868	-
1	6589173	6589174	NOL9	A/I	0.2106	-
1	6589200	6589201	NOL9	A/I	0.1527	-
1	6592094	6592095	NOL9	A/I	0.2018	-
1	6592566	6592567	NOL9	A/I	0.1862	-
1	6592687	6592688	NOL9	A/I	0.1935	-
1	6592707	6592708	NOL9	A/I	0.2057	-
1	6592739	6592740	NOL9	A/I	0.1071	-
1	6605143	6605144	NOL9	A/I	0.2389	-
1	6605153	6605154	NOL9	A/I	0.2126	-
1	6614225	6614226	NOL9	A/I	0.1885	-
1	6614300	6614301	NOL9	A/I	0.1268	-
1	6614324	6614325	NOL9	A/I	0.207	-
1	6614367	6614368	NOL9	A/I	0.1099	-
1	6614498	6614499	NOL9	A/I	0.1781	-
1	6614516	6614517	NOL9	A/I	0.2374	-
1	6640832	6640833	ZBTB48	A/I	0.1439	+
1	6642254	6642255	ZBTB48	A/I	0.2697	+
1	6642276	6642277	ZBTB48	A/I	0.1389	+
1	6642285	6642286	ZBTB48	A/I	0.1217	+
1	6642318	6642319	ZBTB48	A/I	0.1892	+
1	6648850	6648851	ZBTB48	A/I	0.1193	+
1	6649270	6649271	ZBTB48	A/I	0.2576	+
1	6651064	6651065	KLHL21	A/I	0.1356	-
1	6653218	6653219	KLHL21	A/I	0.1069	-
1	6655590	6655591	KLHL21	A/I	0.1276	-
1	6659115	6659116	KLHL21	A/I	0.1717	-
1	6659412	6659413	KLHL21	A/I	0.1667	-
1	6659467	6659468	KLHL21	A/I	0.1193	-
1	6661894	6661895	KLHL21	A/I	0.1255	-
1	6662083	6662084	KLHL21	A/I	0.1993	-
1	6662179	6662180	KLHL21	A/I	0.2852	-
1	6662230	6662231	KLHL21	A/I	0.1071	-
1	6662281	6662282	KLHL21	A/I	0.1372	-
1	6662326	6662327	KLHL21	A/I	0.2067	-
1	6662356	6662357	KLHL21	A/I	0.1845	-
1	6662456	6662457	KLHL21	A/I	0.2251	-
1	6673883	6673884	PHF13	A/I	0.3403	+
1	6673938	6673939	PHF13	A/I	0.2137	+
1	6673958	6673959	PHF13	A/I	0.1501	+
1	6674078	6674079	PHF13	A/I	0.1467	+
1	6674092	6674093	PHF13	A/I	0.1849	+
1	6674126	6674127	PHF13	A/I	0.1748	+
1	6676873	6676874	PHF13	A/I	0.1561	+
1	6680006	6680007	PHF13	A/I	0.3262	+
1	6680033	6680034	PHF13	A/I	0.1413	+
1	6680163	6680164	PHF13	A/I	0.1286	+
1	6680193	6680194	PHF13	A/I	0.1714	+
1	6680198	6680199	PHF13	A/I	0.1805	+
1	6680243	6680244	PHF13	A/I	0.4027	+
1	6680283	6680284	PHF13	A/I	0.1523	+
1	6680352	6680353	PHF13	A/I	0.2361	+
1	6681592	6681593	PHF13	A/I	0.1735	+
1	6681634	6681635	PHF13	A/I	0.1377	+
1	6681655	6681656	PHF13	A/I	0.1445	+
1	6681848	6681849	PHF13	A/I	0.2588	+
1	6681857	6681858	PHF13	A/I	0.4422	+
1	6681861	6681862	PHF13	A/I	0.2041	+
1	6681986	6681987	PHF13	A/I	0.1426	+
1	6682098	6682099	PHF13	A/I	0.2543	+
1	6682111	6682112	PHF13	A/I	0.3857	+
1	6682117	6682118	PHF13	A/I	0.2854	+
1	6682136	6682137	PHF13	A/I	0.281	+
1	6682145	6682146	PHF13	A/I	0.3586	+
1	6682162	6682163	PHF13	A/I	0.1492	+
1	6682184	6682185	PHF13	A/I	0.4629	+
1	6682188	6682189	PHF13	A/I	0.3139	+
1	6682224	6682225	PHF13	A/I	0.2311	+
1	6682290	6682291	PHF13	A/I	0.1441	+
1	6682304	6682305	PHF13	A/I	0.1643	+
1	6682323	6682324	PHF13	A/I	0.2073	+
1	6682393	6682394	PHF13	A/I	0.1945	+
1	6682413	6682414	PHF13	A/I	0.1477	+
1	6682420	6682421	PHF13	A/I	0.1747	+
1	6682456	6682457	PHF13	A/I	0.2011	+
1	6683027	6683028	PHF13	A/I	0.2223	+
1	6683174	6683175	PHF13	A/I	0.1362	+
1	6683252	6683253	PHF13	A/I	0.162	+
1	6683288	6683289	PHF13	A/I	0.1278	+
1	6683413	6683414	PHF13	A/I	0.1831	+
1	6683493	6683494	PHF13	A/I	0.131	+
1	6683503	6683504	PHF13	A/I	0.1751	+
1	6683534	6683535	PHF13	A/I	0.1571	+
1	6683590	6683591	PHF13	A/I	0.1711	+
1	6683620	6683621	PHF13	A/I	0.176	+
1	6683691	6683692	PHF13	A/I	0.2787	+
1	6683824	6683825	PHF13	A/I	0.1866	+
1	6683908	6683909	PHF13	A/I	0.3137	+
1	6685318	6685319	THAP3	A/I	0.2072	+
1	6688622	6688623	THAP3	A/I	0.1686	+
1	6693129	6693130	THAP3	A/I	0.1143	+
1	6693248	6693249	THAP3	A/I	0.158	+
1	6693323	6693324	THAP3	A/I	0.2152	+
1	6694425	6694426	DNAJC11	A/I	0.1166	-
1	6694487	6694488	DNAJC11	A/I	0.2123	-
1	6694800	6694801	DNAJC11	A/I	0.1646	-
1	6694981	6694982	DNAJC11	A/I	0.1166	-
1	6695082	6695083	DNAJC11	A/I	0.4437	-
1	6695485	6695486	DNAJC11	A/I	0.1641	-
1	6695625	6695626	DNAJC11	A/I	0.1786	-
1	6695628	6695629	DNAJC11	A/I	0.1746	-
1	6695631	6695632	DNAJC11	A/I	0.1951	-
1	6695743	6695744	DNAJC11	A/I	0.1425	-
1	6705916	6705917	DNAJC11	A/I	0.2546	-
1	6705956	6705957	DNAJC11	A/I	0.1523	-
1	6714052	6714053	DNAJC11	A/I	0.1274	-
1	6738489	6738490	DNAJC11	A/I	0.3587	-
1	6738509	6738510	DNAJC11	A/I	0.1299	-
1	6741040	6741041	DNAJC11	A/I	0.127	-
1	6741068	6741069	DNAJC11	A/I	0.153	-
1	6880257	6880258	CAMTA1	A/I	0.194	+
1	6880277	6880278	CAMTA1	A/I	0.128	+
1	6880305	6880306	CAMTA1	A/I	0.1513	+
1	6885194	6885195	CAMTA1	A/I	0.2213	+
1	6947726	6947727	CAMTA1	A/I	0.106	+
1	6947870	6947871	CAMTA1	A/I	0.2919	+
1	6947878	6947879	CAMTA1	A/I	0.1382	+
1	6947918	6947919	CAMTA1	A/I	0.2009	+
1	6947932	6947933	CAMTA1	A/I	0.2116	+
1	6947947	6947948	CAMTA1	A/I	0.1568	+
1	6947968	6947969	CAMTA1	A/I	0.1316	+
1	6947971	6947972	CAMTA1	A/I	0.376	+
1	7833505	7833506	VAMP3	A/I	0.1611	+
1	7837322	7837323	VAMP3	A/I	0.1354	+
1	7839721	7839722	VAMP3	A/I	0.1251	+
1	7839776	7839777	VAMP3	A/I	0.1558	+
1	7839785	7839786	VAMP3	A/I	0.1547	+
1	7839926	7839927	VAMP3	A/I	0.1222	+
1	7840004	7840005	VAMP3	A/I	0.1147	+
1	7840130	7840131	VAMP3	A/I	0.151	+
1	7840392	7840393	VAMP3	A/I	0.1181	+
1	7840419	7840420	VAMP3	A/I	0.1061	+
1	7840479	7840480	VAMP3	A/I	0.15	+
1	7840488	7840489	VAMP3	A/I	0.1207	+
1	7840574	7840575	VAMP3	A/I	0.1725	+
1	7840624	7840625	VAMP3	A/I	0.193	+
1	7840684	7840685	VAMP3	A/I	0.126	+
1	7840742	7840743	VAMP3	A/I	0.1355	+
1	7840755	7840756	VAMP3	A/I	0.1333	+
1	7840985	7840986	VAMP3	A/I	0.1249	+
1	7841036	7841037	VAMP3	A/I	0.1611	+
1	7841106	7841107	VAMP3	A/I	0.1674	+
1	7841114	7841115	VAMP3	A/I	0.1555	+
1	7841142	7841143	VAMP3	A/I	0.2125	+
1	7841149	7841150	VAMP3	A/I	0.1941	+
1	7841300	7841301	VAMP3	A/I	0.4404	+
1	7841352	7841353	VAMP3	A/I	0.2103	+
1	8022834	8022835	PARK7	A/I	0.1731	+
1	8037739	8037740	PARK7	A/I	0.1343	+
1	8037752	8037753	PARK7	A/I	0.1111	+
1	8045154	8045155	PARK7	A/I	0.1899	+
1	8071956	8071957	ERRFI1	A/I	0.2896	-
1	8071991	8071992	ERRFI1	A/I	0.3207	-
1	8072116	8072117	ERRFI1	A/I	0.1569	-
1	8072206	8072207	ERRFI1	A/I	0.1496	-
1	8072654	8072655	ERRFI1	A/I	0.1496	-
1	8072772	8072773	ERRFI1	A/I	0.3135	-
1	8073163	8073164	ERRFI1	A/I	0.1725	-
1	8073180	8073181	ERRFI1	A/I	0.1421	-
1	8073298	8073299	ERRFI1	A/I	0.2171	-
1	8073362	8073363	ERRFI1	A/I	0.1924	-
1	8073438	8073439	ERRFI1	A/I	0.1382	-
1	8073467	8073468	ERRFI1	A/I	0.1234	-
1	8073470	8073471	ERRFI1	A/I	0.141	-
1	8073477	8073478	ERRFI1	A/I	0.1504	-
1	8073538	8073539	ERRFI1	A/I	0.1411	-
1	8073585	8073586	ERRFI1	A/I	0.2723	-
1	8073636	8073637	ERRFI1	A/I	0.1326	-
1	8073662	8073663	ERRFI1	A/I	0.1779	-
1	8073664	8073665	ERRFI1	A/I	0.2013	-
1	8073701	8073702	ERRFI1	A/I	0.1314	-
1	8073727	8073728	ERRFI1	A/I	0.1276	-
1	8073742	8073743	ERRFI1	A/I	0.1538	-
1	8073763	8073764	ERRFI1	A/I	0.1219	-
1	8073791	8073792	ERRFI1	A/I	0.1397	-
1	8073851	8073852	ERRFI1	A/I	0.3037	-
1	8073866	8073867	ERRFI1	A/I	0.1371	-
1	8073872	8073873	ERRFI1	A/I	0.2122	-
1	8073886	8073887	ERRFI1	A/I	0.3594	-
1	8074018	8074019	ERRFI1	A/I	0.2034	-
1	8074026	8074027	ERRFI1	A/I	0.2238	-
1	8074032	8074033	ERRFI1	A/I	0.1404	-
1	8074080	8074081	ERRFI1	A/I	0.1834	-
1	8074097	8074098	ERRFI1	A/I	0.1027	-
1	8074099	8074100	ERRFI1	A/I	0.1401	-
1	8074123	8074124	ERRFI1	A/I	0.2105	-
1	8074259	8074260	ERRFI1	A/I	0.2695	-
1	8074265	8074266	ERRFI1	A/I	0.1409	-
1	8074312	8074313	ERRFI1	A/I	0.2218	-
1	8074322	8074323	ERRFI1	A/I	0.1795	-
1	8075374	8075375	ERRFI1	A/I	0.2551	-
1	8075408	8075409	ERRFI1	A/I	0.2923	-
1	8075419	8075420	ERRFI1	A/I	0.1782	-
1	8075430	8075431	ERRFI1	A/I	0.1743	-
1	8075434	8075435	ERRFI1	A/I	0.2088	-
1	8075558	8075559	ERRFI1	A/I	0.1589	-
1	8075594	8075595	ERRFI1	A/I	0.1844	-
1	8075619	8075620	ERRFI1	A/I	0.1881	-
1	8075686	8075687	ERRFI1	A/I	0.2129	-
1	8075708	8075709	ERRFI1	A/I	0.199	-
1	8086275	8086276	ERRFI1	A/I	0.1386	-
1	8416166	8416167	RERE	A/I	0.1619	-
1	8418860	8418861	RERE	A/I	0.2344	-
1	8526066	8526067	RERE	A/I	0.251	-
1	8877244	8877245	RERE	A/I	0.3256	-
1	8921205	8921206	ENO1	A/I	0.2279	-
1	8921259	8921260	ENO1	A/I	0.1563	-
1	8921268	8921269	ENO1	A/I	0.1509	-
1	8921308	8921309	ENO1	A/I	0.1439	-
1	8921419	8921420	ENO1	A/I	0.2549	-
1	8921486	8921487	ENO1	A/I	0.1409	-
1	8925501	8925502	ENO1	A/I	0.1339	-
1	8926435	8926436	ENO1	A/I	0.1222	-
1	8938702	8938703	ENO1	A/I	0.1893	-
1	8938741	8938742	ENO1	A/I	0.1345	-
1	9599597	9599598	SLC25A33	A/I	0.1364	+
1	9599665	9599666	SLC25A33	A/I	0.1295	+
1	9599769	9599770	SLC25A33	A/I	0.1463	+
1	9599780	9599781	SLC25A33	A/I	0.1709	+
1	9613752	9613753	SLC25A33	A/I	0.1037	+
1	9613775	9613776	SLC25A33	A/I	0.128	+
1	9633411	9633412	SLC25A33	A/I	0.1476	+
1	9633422	9633423	SLC25A33	A/I	0.139	+
1	9640043	9640044	SLC25A33	A/I	0.1181	+
1	9640055	9640056	SLC25A33	A/I	0.1665	+
1	9640283	9640284	SLC25A33	A/I	0.1446	+
1	9642395	9642396	SLC25A33	A/I	0.2071	+
1	9642455	9642456	SLC25A33	A/I	0.1366	+
1	9642518	9642519	SLC25A33	A/I	0.1165	+
1	9642588	9642589	SLC25A33	A/I	0.2278	+
1	9642669	9642670	SLC25A33	A/I	0.254	+
1	9642754	9642755	SLC25A33	A/I	0.1676	+
1	9643941	9643942	SLC25A33	A/I	0.2666	+
1	9656928	9656929	TMEM201	A/I	0.143	+
1	9656950	9656951	TMEM201	A/I	0.2431	+
1	9658679	9658680	TMEM201	A/I	0.1079	+
1	9661386	9661387	TMEM201	A/I	0.1682	+
1	9661397	9661398	TMEM201	A/I	0.1906	+
1	9662182	9662183	TMEM201	A/I	0.1072	+
1	9662602	9662603	TMEM201	A/I	0.2	+
1	9662637	9662638	TMEM201	A/I	0.197	+
1	9663921	9663922	TMEM201	A/I	0.4309	+
1	9664645	9664646	TMEM201	A/I	0.2927	+
1	9664694	9664695	TMEM201	A/I	0.225	+
1	9741058	9741059	RP11-558F24.4	A/I	0.1439	-
1	9741151	9741152	RP11-558F24.4	A/I	0.23	-
1	9789308	9789309	CLSTN1	A/I	0.1209	-
1	9789350	9789351	CLSTN1	A/I	0.1309	-
1	9789651	9789652	CLSTN1	A/I	0.107	-
1	9789950	9789951	CLSTN1	A/I	0.1088	-
1	9790584	9790585	CLSTN1	A/I	0.1549	-
1	9795171	9795172	CLSTN1	A/I	0.158	-
1	9795587	9795588	CLSTN1	A/I	0.1777	-
1	9801185	9801186	CLSTN1	A/I	0.1266	-
1	9801275	9801276	CLSTN1	A/I	0.1252	-
1	9803999	9804000	CLSTN1	A/I	0.125	-
1	9811725	9811726	CLSTN1	A/I	0.1293	-
1	9815304	9815305	CLSTN1	A/I	0.1281	-
1	9815306	9815307	CLSTN1	A/I	0.1352	-
1	9833449	9833450	CLSTN1	A/I	0.1813	-
1	9910238	9910239	CTNNBIP1	A/I	0.2941	-
1	9910240	9910241	CTNNBIP1	A/I	0.297	-
1	9989795	9989796	LZIC	A/I	0.2459	-
1	9990022	9990023	LZIC	A/I	0.2924	-
1	9990040	9990041	LZIC	A/I	0.1831	-
1	9990135	9990136	LZIC	A/I	0.1945	-
1	9990300	9990301	LZIC	A/I	0.1201	-
1	9990317	9990318	LZIC	A/I	0.2008	-
1	9990319	9990320	LZIC	A/I	0.3054	-
1	9990345	9990346	LZIC	A/I	0.1513	-
1	9990383	9990384	LZIC	A/I	0.1743	-
1	9990414	9990415	LZIC	A/I	0.2016	-
1	9992912	9992913	LZIC	A/I	0.2295	-
1	9992949	9992950	LZIC	A/I	0.159	-
1	9996629	9996630	LZIC	A/I	0.1472	-
1	10032178	10032179	NMNAT1	A/I	0.1381	+
1	10035714	10035715	NMNAT1	A/I	0.1842	+
1	10035753	10035754	NMNAT1	A/I	0.2426	+
1	10035765	10035766	NMNAT1	A/I	0.2043	+
1	10035783	10035784	NMNAT1	A/I	0.3351	+
1	10035830	10035831	NMNAT1	A/I	0.2286	+
1	10042679	10042680	NMNAT1	A/I	0.24	+
1	10042738	10042739	NMNAT1	A/I	0.1909	+
1	10044453	10044454	NMNAT1	A/I	0.3026	+
1	10093344	10093345	UBE4B	A/I	0.1655	+
1	10093355	10093356	UBE4B	A/I	0.1494	+
1	10093358	10093359	UBE4B	A/I	0.1378	+
1	10093559	10093560	UBE4B	A/I	0.3216	+
1	10093577	10093578	UBE4B	A/I	0.2051	+
1	10093584	10093585	UBE4B	A/I	0.138	+
1	10093599	10093600	UBE4B	A/I	0.1051	+
1	10093641	10093642	UBE4B	A/I	0.1604	+
1	10093716	10093717	UBE4B	A/I	0.2457	+
1	10132261	10132262	UBE4B	A/I	0.2011	+
1	10155622	10155623	UBE4B	A/I	0.1667	+
1	10163046	10163047	UBE4B	A/I	0.2258	+
1	10163048	10163049	UBE4B	A/I	0.2369	+
1	10165574	10165575	UBE4B	A/I	0.245	+
1	10165610	10165611	UBE4B	A/I	0.246	+
1	10165713	10165714	UBE4B	A/I	0.1497	+
1	10165727	10165728	UBE4B	A/I	0.1911	+
1	10165800	10165801	UBE4B	A/I	0.2031	+
1	10177554	10177555	UBE4B	A/I	0.2341	+
1	10177605	10177606	UBE4B	A/I	0.2452	+
1	10179609	10179610	UBE4B	A/I	0.4141	+
1	10179633	10179634	UBE4B	A/I	0.2074	+
1	10179641	10179642	UBE4B	A/I	0.2033	+
1	10182051	10182052	UBE4B	A/I	0.191	+
1	10182075	10182076	UBE4B	A/I	0.1494	+
1	10186853	10186854	UBE4B	A/I	0.1781	+
1	10186920	10186921	UBE4B	A/I	0.1869	+
1	10186924	10186925	UBE4B	A/I	0.2462	+
1	10190630	10190631	UBE4B	A/I	0.2866	+
1	10190775	10190776	UBE4B	A/I	0.1768	+
1	10190791	10190792	UBE4B	A/I	0.2115	+
1	10190811	10190812	UBE4B	A/I	0.1615	+
1	10192493	10192494	UBE4B	A/I	0.3019	+
1	10195128	10195129	UBE4B	A/I	0.2724	+
1	10195148	10195149	UBE4B	A/I	0.2198	+
1	10195150	10195151	UBE4B	A/I	0.1842	+
1	10195174	10195175	UBE4B	A/I	0.1438	+
1	10209325	10209326	UBE4B	A/I	0.2163	+
1	10211403	10211404	UBE4B	A/I	0.1757	+
1	10218472	10218473	UBE4B	A/I	0.3279	+
1	10221224	10221225	UBE4B	A/I	0.155	+
1	10221238	10221239	UBE4B	A/I	0.1911	+
1	10231231	10231232	UBE4B	A/I	0.4466	+
1	10231292	10231293	UBE4B	A/I	0.2052	+
1	10231302	10231303	UBE4B	A/I	0.1246	+
1	10231333	10231334	UBE4B	A/I	0.2344	+
1	10231337	10231338	UBE4B	A/I	0.3222	+
1	10231341	10231342	UBE4B	A/I	0.1733	+
1	10238772	10238773	UBE4B	A/I	0.2094	+
1	10239956	10239957	UBE4B	A/I	0.1139	+
1	10240043	10240044	UBE4B	A/I	0.2194	+
1	10240151	10240152	UBE4B	A/I	0.184	+
1	10240202	10240203	UBE4B	A/I	0.1869	+
1	10240206	10240207	UBE4B	A/I	0.1636	+
1	10240223	10240224	UBE4B	A/I	0.1267	+
1	10240251	10240252	UBE4B	A/I	0.1421	+
1	10240265	10240266	UBE4B	A/I	0.2279	+
1	10240371	10240372	UBE4B	A/I	0.1699	+
1	10240393	10240394	UBE4B	A/I	0.2368	+
1	10292320	10292321	KIF1B	A/I	0.2306	+
1	10292346	10292347	KIF1B	A/I	0.2667	+
1	10342504	10342505	KIF1B	A/I	0.2886	+
1	10342534	10342535	KIF1B	A/I	0.2906	+
1	10356974	10356975	KIF1B	A/I	0.16	+
1	10356995	10356996	KIF1B	A/I	0.1861	+
1	10363709	10363710	KIF1B	A/I	0.3077	+
1	10366353	10366354	KIF1B	A/I	0.3325	+
1	10366381	10366382	KIF1B	A/I	0.3818	+
1	10368227	10368228	KIF1B	A/I	0.1838	+
1	10437838	10437839	KIF1B	A/I	0.2671	+
1	10463129	10463130	PGD	A/I	0.1084	+
1	10471524	10471525	PGD	A/I	0.131	+
1	10471559	10471560	PGD	A/I	0.1706	+
1	10473284	10473285	PGD	A/I	0.1809	+
1	10473291	10473292	PGD	A/I	0.1568	+
1	10477144	10477145	PGD	A/I	0.1378	+
1	10477439	10477440	PGD	A/I	0.202	+
1	10477460	10477461	PGD	A/I	0.1316	+
1	10477474	10477475	PGD	A/I	0.1409	+
1	10477520	10477521	PGD	A/I	0.1315	+
1	10478885	10478886	PGD	A/I	0.1096	+
1	10478942	10478943	PGD	A/I	0.1215	+
1	10479533	10479534	PGD	A/I	0.1384	+
1	10479711	10479712	PGD	A/I	0.1532	+
1	10479746	10479747	PGD	A/I	0.249	+
1	10479795	10479796	PGD	A/I	0.2915	+
1	10479910	10479911	PGD	A/I	0.123	+
1	10479950	10479951	PGD	A/I	0.1476	+
1	10479956	10479957	PGD	A/I	0.1416	+
1	10480146	10480147	PGD	A/I	0.1434	+
1	10480175	10480176	PGD	A/I	0.1713	+
1	10480182	10480183	PGD	A/I	0.1709	+
1	10490965	10490966	APITD1	A/I	0.2679	+
1	10490969	10490970	APITD1	A/I	0.1464	+
1	10491050	10491051	APITD1	A/I	0.3375	+
1	10491140	10491141	APITD1	A/I	0.1953	+
1	10491291	10491292	APITD1	A/I	0.1583	+
1	10493917	10493918	APITD1-CORT	A/I	0.1863	+
1	10502431	10502432	APITD1	A/I	0.1295	+
1	10502453	10502454	APITD1	A/I	0.4668	+
1	10502494	10502495	APITD1-CORT	A/I	0.1698	+
1	10502548	10502549	APITD1	A/I	0.1405	+
1	10517402	10517403	DFFA	A/I	0.1761	-
1	10517900	10517901	DFFA	A/I	0.1225	-
1	10518019	10518020	DFFA	A/I	0.1219	-
1	10518255	10518256	DFFA	A/I	0.1269	-
1	10518302	10518303	DFFA	A/I	0.1033	-
1	10518327	10518328	DFFA	A/I	0.1474	-
1	10519259	10519260	DFFA	A/I	0.1255	-
1	10519665	10519666	DFFA	A/I	0.115	-
1	10521303	10521304	DFFA	A/I	0.1321	-
1	10521403	10521404	DFFA	A/I	0.1177	-
1	10521502	10521503	DFFA	A/I	0.1436	-
1	10521547	10521548	DFFA	A/I	0.1362	-
1	10521752	10521753	DFFA	A/I	0.146	-
1	10522618	10522619	DFFA	A/I	0.2162	-
1	10522982	10522983	DFFA	A/I	0.2148	-
1	10523086	10523087	DFFA	A/I	0.1809	-
1	10523132	10523133	DFFA	A/I	0.1154	-
1	10523165	10523166	DFFA	A/I	0.1607	-
1	10523170	10523171	DFFA	A/I	0.1072	-
1	10523218	10523219	DFFA	A/I	0.144	-
1	10523228	10523229	DFFA	A/I	0.1979	-
1	10527261	10527262	DFFA	A/I	0.2737	-
1	10529284	10529285	DFFA	A/I	0.1453	-
1	10529307	10529308	DFFA	A/I	0.1533	-
1	10529371	10529372	DFFA	A/I	0.1685	-
1	10532435	10532436	DFFA	A/I	0.237	-
1	10532488	10532489	DFFA	A/I	0.1195	-
1	10596294	10596295	PEX14	A/I	0.2273	+
1	10659317	10659318	PEX14	A/I	0.1725	+
1	10683079	10683080	PEX14	A/I	0.1333	+
1	10690294	10690295	PEX14	A/I	0.1429	+
1	10690619	10690620	PEX14	A/I	0.1383	+
1	10690627	10690628	PEX14	A/I	0.1784	+
1	10720568	10720569	CASZ1	A/I	0.3709	-
1	11073794	11073795	TARDBP	A/I	0.2089	+
1	11077029	11077030	TARDBP	A/I	0.1661	+
1	11077055	11077056	TARDBP	A/I	0.1252	+
1	11078885	11078886	TARDBP	A/I	0.1555	+
1	11078921	11078922	TARDBP	A/I	0.1311	+
1	11080512	11080513	TARDBP	A/I	0.1087	+
1	11080538	11080539	TARDBP	A/I	0.1464	+
1	11082579	11082580	TARDBP	A/I	0.1145	+
1	11083208	11083209	TARDBP	A/I	0.1376	+
1	11083218	11083219	TARDBP	A/I	0.1433	+
1	11083432	11083433	TARDBP	A/I	0.126	+
1	11083460	11083461	TARDBP	A/I	0.1269	+
1	11083536	11083537	TARDBP	A/I	0.1471	+
1	11083667	11083668	TARDBP	A/I	0.1287	+
1	11083722	11083723	TARDBP	A/I	0.1101	+
1	11083823	11083824	TARDBP	A/I	0.1426	+
1	11083855	11083856	TARDBP	A/I	0.1405	+
1	11084003	11084004	TARDBP	A/I	0.2297	+
1	11114650	11114651	SRM	A/I	0.1779	-
1	11115904	11115905	SRM	A/I	0.2192	-
1	11126775	11126776	EXOSC10	A/I	0.1502	-
1	11128112	11128113	EXOSC10	A/I	0.1043	-
1	11129657	11129658	EXOSC10	A/I	0.1608	-
1	11129784	11129785	EXOSC10	A/I	0.1449	-
1	11130963	11130964	EXOSC10	A/I	0.2484	-
1	11132148	11132149	EXOSC10	A/I	0.1982	-
1	11132179	11132180	EXOSC10	A/I	0.1376	-
1	11132198	11132199	EXOSC10	A/I	0.2194	-
1	11142845	11142846	EXOSC10	A/I	0.1048	-
1	11147928	11147929	EXOSC10	A/I	0.1566	-
1	11147962	11147963	EXOSC10	A/I	0.1257	-
1	11150679	11150680	EXOSC10	A/I	0.1587	-
1	11151624	11151625	EXOSC10	A/I	0.1341	-
1	11155925	11155926	EXOSC10	A/I	0.126	-
1	11158165	11158166	EXOSC10	A/I	0.1167	-
1	11159872	11159873	EXOSC10	A/I	0.1767	-
1	11166793	11166794	MTOR	A/I	0.2074	-
1	11166941	11166942	MTOR	A/I	0.1027	-
1	11166948	11166949	MTOR	A/I	0.1461	-
1	11166950	11166951	MTOR	A/I	0.1573	-
1	11167109	11167110	MTOR	A/I	0.1927	-
1	11167245	11167246	MTOR	A/I	0.1686	-
1	11167257	11167258	MTOR	A/I	0.1137	-
1	11167301	11167302	MTOR	A/I	0.2145	-
1	11167304	11167305	MTOR	A/I	0.1527	-
1	11167404	11167405	MTOR	A/I	0.1078	-
1	11167423	11167424	MTOR	A/I	0.1517	-
1	11167542	11167543	MTOR	A/I	0.1505	-
1	11168244	11168245	MTOR	A/I	0.2247	-
1	11168246	11168247	MTOR	A/I	0.2778	-
1	11182087	11182088	MTOR	A/I	0.1397	-
1	11182110	11182111	MTOR	A/I	0.1171	-
1	11186685	11186686	MTOR	A/I	0.1502	-
1	11186714	11186715	MTOR	A/I	0.1079	-
1	11186775	11186776	MTOR	A/I	0.1109	-
1	11187103	11187104	MTOR	A/I	0.2123	-
1	11187727	11187728	MTOR	A/I	0.1532	-
1	11188578	11188579	MTOR	A/I	0.1414	-
1	11188603	11188604	MTOR	A/I	0.2479	-
1	11188995	11188996	MTOR	A/I	0.1	-
1	11190668	11190669	MTOR	A/I	0.2416	-
1	11193173	11193174	MTOR	A/I	0.1394	-
1	11193176	11193177	MTOR	A/I	0.2135	-
1	11194453	11194454	MTOR	A/I	0.1312	-
1	11194464	11194465	MTOR	A/I	0.1303	-
1	11194506	11194507	MTOR	A/I	0.1	-
1	11204762	11204763	MTOR	A/I	0.2185	-
1	11204769	11204770	MTOR	A/I	0.134	-
1	11205063	11205064	MTOR	A/I	0.2178	-
1	11206733	11206734	MTOR	A/I	0.1374	-
1	11206779	11206780	MTOR	A/I	0.1678	-
1	11210239	11210240	MTOR	A/I	0.1895	-
1	11217335	11217336	MTOR	A/I	0.1867	-
1	11227523	11227524	MTOR	A/I	0.1683	-
1	11227528	11227529	MTOR	A/I	0.1523	-
1	11227563	11227564	MTOR	A/I	0.1743	-
1	11227566	11227567	MTOR	A/I	0.1337	-
1	11227569	11227570	MTOR	A/I	0.1971	-
1	11259716	11259717	MTOR	A/I	0.1482	-
1	11272911	11272912	MTOR	A/I	0.2261	-
1	11273460	11273461	MTOR	A/I	0.1233	-
1	11288759	11288760	MTOR	A/I	0.1458	-
1	11288791	11288792	MTOR	A/I	0.1525	-
1	11288828	11288829	MTOR	A/I	0.12	-
1	11288865	11288866	MTOR	A/I	0.1736	-
1	11288960	11288961	MTOR	A/I	0.1721	-
1	11300434	11300435	MTOR	A/I	0.1145	-
1	11300480	11300481	MTOR	A/I	0.1179	-
1	11300499	11300500	MTOR	A/I	0.1286	-
1	11300503	11300504	MTOR	A/I	0.1677	-
1	11300577	11300578	MTOR	A/I	0.1663	-
1	11301646	11301647	MTOR	A/I	0.2304	-
1	11303171	11303172	MTOR	A/I	0.2696	-
1	11303207	11303208	MTOR	A/I	0.1497	-
1	11303230	11303231	MTOR	A/I	0.1492	-
1	11303237	11303238	MTOR	A/I	0.1165	-
1	11303341	11303342	MTOR	A/I	0.1667	-
1	11307759	11307760	MTOR	A/I	0.1611	-
1	11308051	11308052	MTOR	A/I	0.1144	-
1	11316052	11316053	MTOR	A/I	0.2065	-
1	11317072	11317073	MTOR	A/I	0.1859	-
1	11318615	11318616	MTOR	A/I	0.1346	-
1	11333421	11333422	UBIAD1	A/I	0.2147	+
1	11333621	11333622	UBIAD1	A/I	0.2258	+
1	11333774	11333775	UBIAD1	A/I	0.1395	+
1	11333898	11333899	UBIAD1	A/I	0.2803	+
1	11334003	11334004	UBIAD1	A/I	0.1847	+
1	11334039	11334040	UBIAD1	A/I	0.1651	+
1	11334074	11334075	UBIAD1	A/I	0.1981	+
1	11334078	11334079	UBIAD1	A/I	0.2078	+
1	11346035	11346036	UBIAD1	A/I	0.2274	+
1	11716106	11716107	FBXO44	A/I	0.1956	+
1	11716113	11716114	FBXO44	A/I	0.127	+
1	11718824	11718825	FBXO44	A/I	0.1778	+
1	11721228	11721229	FBXO44	A/I	0.1137	+
1	11721259	11721260	FBXO44	A/I	0.1135	+
1	11721262	11721263	FBXO44	A/I	0.1323	+
1	11736968	11736969	MAD2L2	A/I	0.1552	-
1	11737624	11737625	MAD2L2	A/I	0.2354	-
1	11740425	11740426	MAD2L2	A/I	0.141	-
1	11740458	11740459	MAD2L2	A/I	0.1259	-
1	11740696	11740697	MAD2L2	A/I	0.1536	-
1	11740860	11740861	MAD2L2	A/I	0.2058	-
1	11807595	11807596	AGTRAP	A/I	0.1573	+
1	11808631	11808632	AGTRAP	A/I	0.1669	+
1	11810229	11810230	AGTRAP	A/I	0.1485	+
1	11983383	11983384	KIAA2013	A/I	0.1084	-
1	11983411	11983412	KIAA2013	A/I	0.1466	-
1	11983479	11983480	KIAA2013	A/I	0.132	-
1	11985956	11985957	KIAA2013	A/I	0.1137	-
1	11986045	11986046	KIAA2013	A/I	0.1137	-
1	11986151	11986152	KIAA2013	A/I	0.2404	-
1	11986280	11986281	KIAA2013	A/I	0.1459	-
1	11994827	11994828	PLOD1	A/I	0.2076	+
1	12008061	12008062	PLOD1	A/I	0.1038	+
1	12008088	12008089	PLOD1	A/I	0.1742	+
1	12008113	12008114	PLOD1	A/I	0.1114	+
1	12010418	12010419	PLOD1	A/I	0.1918	+
1	12014922	12014923	PLOD1	A/I	0.1118	+
1	12017958	12017959	PLOD1	A/I	0.2702	+
1	12020712	12020713	PLOD1	A/I	0.1069	+
1	12020757	12020758	PLOD1	A/I	0.1659	+
1	12024311	12024312	PLOD1	A/I	0.1167	+
1	12024722	12024723	PLOD1	A/I	0.1802	+
1	12024735	12024736	PLOD1	A/I	0.1433	+
1	12024830	12024831	PLOD1	A/I	0.1976	+
1	12024837	12024838	PLOD1	A/I	0.2231	+
1	12025615	12025616	PLOD1	A/I	0.1167	+
1	12026323	12026324	PLOD1	A/I	0.2018	+
1	12030808	12030809	PLOD1	A/I	0.2168	+
1	12033049	12033050	PLOD1	A/I	0.1196	+
1	12034734	12034735	PLOD1	A/I	0.1228	+
1	12034800	12034801	PLOD1	A/I	0.1215	+
1	12034820	12034821	PLOD1	A/I	0.1065	+
1	12035109	12035110	PLOD1	A/I	0.2889	+
1	12035119	12035120	PLOD1	A/I	0.1496	+
1	12035394	12035395	PLOD1	A/I	0.131	+
1	12035453	12035454	PLOD1	A/I	0.1752	+
1	12035468	12035469	PLOD1	A/I	0.2462	+
1	12042059	12042060	MFN2	A/I	0.1157	+
1	12052643	12052644	MFN2	A/I	0.1439	+
1	12058833	12058834	MFN2	A/I	0.1286	+
1	12059141	12059142	MFN2	A/I	0.1147	+
1	12064133	12064134	MFN2	A/I	0.1254	+
1	12064576	12064577	MFN2	A/I	0.1141	+
1	12064606	12064607	MFN2	A/I	0.1505	+
1	12064620	12064621	MFN2	A/I	0.1592	+
1	12067274	12067275	MFN2	A/I	0.1101	+
1	12072551	12072552	MFN2	A/I	0.1911	+
1	12072794	12072795	MFN2	A/I	0.1487	+
1	12072870	12072871	MFN2	A/I	0.1096	+
1	12073353	12073354	MFN2	A/I	0.127	+
1	12073386	12073387	MFN2	A/I	0.1038	+
1	12073427	12073428	MFN2	A/I	0.1964	+
1	12082172	12082173	MIIP	A/I	0.1352	+
1	12082176	12082177	MIIP	A/I	0.1875	+
1	12082178	12082179	MIIP	A/I	0.1438	+
1	12082950	12082951	MIIP	A/I	0.3006	+
1	12089302	12089303	MIIP	A/I	0.2225	+
1	12089827	12089828	MIIP	A/I	0.2118	+
1	12089833	12089834	MIIP	A/I	0.1807	+
1	12090130	12090131	MIIP	A/I	0.1464	+
1	12091367	12091368	MIIP	A/I	0.1844	+
1	12091425	12091426	MIIP	A/I	0.2211	+
1	12091442	12091443	MIIP	A/I	0.1141	+
1	12091783	12091784	MIIP	A/I	0.1427	+
1	12091811	12091812	MIIP	A/I	0.134	+
1	13910464	13910465	PDPN	A/I	0.2993	+
1	13933693	13933694	PDPN	A/I	0.1497	+
1	13933702	13933703	PDPN	A/I	0.2672	+
1	13933704	13933705	PDPN	A/I	0.1245	+
1	13936904	13936905	PDPN	A/I	0.1633	+
1	13936937	13936938	PDPN	A/I	0.1253	+
1	13936963	13936964	PDPN	A/I	0.1108	+
1	13940181	13940182	PDPN	A/I	0.1058	+
1	13940202	13940203	PDPN	A/I	0.1007	+
1	13940822	13940823	PDPN	A/I	0.1119	+
1	13940828	13940829	PDPN	A/I	0.283	+
1	13940902	13940903	PDPN	A/I	0.2151	+
1	13942404	13942405	PDPN	A/I	0.1246	+
1	13942420	13942421	PDPN	A/I	0.131	+
1	13942508	13942509	PDPN	A/I	0.1589	+
1	13942558	13942559	PDPN	A/I	0.1791	+
1	13942629	13942630	PDPN	A/I	0.1973	+
1	13942638	13942639	PDPN	A/I	0.1562	+
1	13942666	13942667	PDPN	A/I	0.1572	+
1	13942686	13942687	PDPN	A/I	0.1621	+
1	13942726	13942727	PDPN	A/I	0.1971	+
1	13942729	13942730	PDPN	A/I	0.1604	+
1	13942731	13942732	PDPN	A/I	0.1478	+
1	13942738	13942739	PDPN	A/I	0.1233	+
1	13942798	13942799	PDPN	A/I	0.2009	+
1	13942836	13942837	PDPN	A/I	0.2162	+
1	13942881	13942882	PDPN	A/I	0.2368	+
1	13942912	13942913	PDPN	A/I	0.192	+
1	13942960	13942961	PDPN	A/I	0.2372	+
1	13942984	13942985	PDPN	A/I	0.187	+
1	13943022	13943023	PDPN	A/I	0.1834	+
1	13943044	13943045	PDPN	A/I	0.2496	+
1	13943174	13943175	PDPN	A/I	0.1464	+
1	13943227	13943228	PDPN	A/I	0.2167	+
1	13943395	13943396	PDPN	A/I	0.2768	+
1	13943541	13943542	PDPN	A/I	0.2223	+
1	13943755	13943756	PDPN	A/I	0.1729	+
1	13943835	13943836	PDPN	A/I	0.1717	+
1	13943874	13943875	PDPN	A/I	0.1891	+
1	13943946	13943947	PDPN	A/I	0.2792	+
1	13944176	13944177	PDPN	A/I	0.1502	+
1	14106431	14106432	PRDM2	A/I	0.1958	+
1	14106483	14106484	PRDM2	A/I	0.1747	+
1	14106699	14106700	PRDM2	A/I	0.2319	+
1	14106735	14106736	PRDM2	A/I	0.2642	+
1	14106988	14106989	PRDM2	A/I	0.1915	+
1	14106992	14106993	PRDM2	A/I	0.3256	+
1	14107229	14107230	PRDM2	A/I	0.2618	+
1	14107532	14107533	PRDM2	A/I	0.2606	+
1	14107583	14107584	PRDM2	A/I	0.2441	+
1	14107748	14107749	PRDM2	A/I	0.3084	+
1	14108253	14108254	PRDM2	A/I	0.2005	+
1	14108402	14108403	PRDM2	A/I	0.2929	+
1	14113181	14113182	PRDM2	A/I	0.3009	+
1	15752463	15752464	EFHD2	A/I	0.1395	+
1	15753663	15753664	EFHD2	A/I	0.1156	+
1	15755193	15755194	EFHD2	A/I	0.1215	+
1	15755215	15755216	EFHD2	A/I	0.1744	+
1	15755218	15755219	EFHD2	A/I	0.2045	+
1	15755323	15755324	EFHD2	A/I	0.1603	+
1	15755334	15755335	EFHD2	A/I	0.1221	+
1	15755370	15755371	EFHD2	A/I	0.1467	+
1	15755424	15755425	EFHD2	A/I	0.1168	+
1	15755786	15755787	EFHD2	A/I	0.344	+
1	15756141	15756142	EFHD2	A/I	0.1381	+
1	15756664	15756665	EFHD2	A/I	0.175	+
1	15756672	15756673	EFHD2	A/I	0.1607	+
1	15819135	15819136	CASP9	A/I	0.3111	-
1	15931183	15931184	CHCHD2P6	A/I	0.2242	+
1	15931322	15931323	CHCHD2P6	A/I	0.4047	+
1	15931370	15931371	CHCHD2P6	A/I	0.1911	+
1	15931377	15931378	CHCHD2P6	A/I	0.2912	+
1	15953199	15953200	DDI2	A/I	0.2917	+
1	15956823	15956824	DDI2	A/I	0.1869	+
1	15956862	15956863	DDI2	A/I	0.1444	+
1	15956971	15956972	DDI2	A/I	0.3373	+
1	15970137	15970138	DDI2	A/I	0.2586	+
1	15976258	15976259	DDI2	A/I	0.4336	+
1	15983135	15983136	DDI2	A/I	0.1909	+
1	15986351	15986352	DDI2	A/I	0.1681	+
1	15986936	15986937	RSC1A1	A/I	0.2062	+
1	15988012	15988013	RSC1A1	A/I	0.3191	+
1	15988118	15988119	RSC1A1	A/I	0.3037	+
1	16043247	16043248	PLEKHM2	A/I	0.2969	+
1	16046256	16046257	PLEKHM2	A/I	0.1608	+
1	16046271	16046272	PLEKHM2	A/I	0.1805	+
1	16046283	16046284	PLEKHM2	A/I	0.1573	+
1	16047863	16047864	PLEKHM2	A/I	0.2159	+
1	16051885	16051886	PLEKHM2	A/I	0.1112	+
1	16051954	16051955	PLEKHM2	A/I	0.101	+
1	16053929	16053930	PLEKHM2	A/I	0.1552	+
1	16053943	16053944	PLEKHM2	A/I	0.1676	+
1	16053960	16053961	PLEKHM2	A/I	0.1644	+
1	16053968	16053969	PLEKHM2	A/I	0.2261	+
1	16053992	16053993	PLEKHM2	A/I	0.17	+
1	16054124	16054125	PLEKHM2	A/I	0.1666	+
1	16055205	16055206	PLEKHM2	A/I	0.2018	+
1	16056325	16056326	PLEKHM2	A/I	0.1746	+
1	16056347	16056348	PLEKHM2	A/I	0.1377	+
1	16057079	16057080	PLEKHM2	A/I	0.1593	+
1	16057098	16057099	PLEKHM2	A/I	0.2218	+
1	16057156	16057157	PLEKHM2	A/I	0.1331	+
1	16059163	16059164	PLEKHM2	A/I	0.1195	+
1	16059218	16059219	PLEKHM2	A/I	0.2289	+
1	16060306	16060307	PLEKHM2	A/I	0.1202	+
1	16060635	16060636	PLEKHM2	A/I	0.1551	+
1	16060913	16060914	PLEKHM2	A/I	0.136	+
1	16060928	16060929	PLEKHM2	A/I	0.203	+
1	16060937	16060938	PLEKHM2	A/I	0.1618	+
1	16060966	16060967	PLEKHM2	A/I	0.1142	+
1	16061019	16061020	PLEKHM2	A/I	0.1852	+
1	16103753	16103754	FBLIM1	A/I	0.1693	+
1	16111178	16111179	FBLIM1	A/I	0.1434	+
1	16111717	16111718	FBLIM1	A/I	0.3542	+
1	16133797	16133798	RP11-169K16.7	A/I	0.3974	-
1	16133869	16133870	RP11-169K16.7	A/I	0.18	-
1	16133957	16133958	RP11-169K16.7	A/I	0.3386	-
1	16133961	16133962	RP11-169K16.7	A/I	0.2172	-
1	16134066	16134067	RP11-169K16.7	A/I	0.1116	-
1	16134151	16134152	RP11-169K16.7	A/I	0.1182	-
1	16161013	16161014	RP11-169K16.9	A/I	0.4773	-
1	16161067	16161068	RP11-169K16.9	A/I	0.5595	-
1	16161118	16161119	RP11-169K16.9	A/I	0.3761	-
1	16174409	16174410	SPEN	A/I	0.1846	+
1	16174635	16174636	SPEN	A/I	0.2151	+
1	16174640	16174641	SPEN	A/I	0.1242	+
1	16199395	16199396	SPEN	A/I	0.1633	+
1	16199403	16199404	SPEN	A/I	0.1464	+
1	16199405	16199406	SPEN	A/I	0.1298	+
1	16203001	16203002	SPEN	A/I	0.2191	+
1	16245440	16245441	SPEN	A/I	0.1703	+
1	16247404	16247405	SPEN	A/I	0.2113	+
1	16256712	16256713	SPEN	A/I	0.1523	+
1	16257834	16257835	SPEN	A/I	0.1201	+
1	16257862	16257863	SPEN	A/I	0.1496	+
1	16258999	16259000	SPEN	A/I	0.1328	+
1	16259303	16259304	SPEN	A/I	0.1264	+
1	16260159	16260160	SPEN	A/I	0.1512	+
1	16260589	16260590	SPEN	A/I	0.1329	+
1	16260766	16260767	SPEN	A/I	0.1406	+
1	16261072	16261073	SPEN	A/I	0.1235	+
1	16261876	16261877	SPEN	A/I	0.1583	+
1	16265308	16265309	SPEN	A/I	0.1663	+
1	16266117	16266118	SPEN	A/I	0.1834	+
1	16266119	16266120	SPEN	A/I	0.1303	+
1	16266121	16266122	SPEN	A/I	0.1431	+
1	16266129	16266130	SPEN	A/I	0.1368	+
1	16268725	16268726	ZBTB17	A/I	0.1479	-
1	16268734	16268735	ZBTB17	A/I	0.1753	-
1	16268738	16268739	ZBTB17	A/I	0.1425	-
1	16274971	16274972	ZBTB17	A/I	0.2899	-
1	16299583	16299584	ZBTB17	A/I	0.375	-
1	16451123	16451124	EPHA2	A/I	0.2637	-
1	16451130	16451131	EPHA2	A/I	0.2354	-
1	16451134	16451135	EPHA2	A/I	0.1926	-
1	16451297	16451298	EPHA2	A/I	0.1736	-
1	16451299	16451300	EPHA2	A/I	0.1356	-
1	16451418	16451419	EPHA2	A/I	0.1247	-
1	16451479	16451480	EPHA2	A/I	0.1801	-
1	16451491	16451492	EPHA2	A/I	0.2947	-
1	16451495	16451496	EPHA2	A/I	0.169	-
1	16451606	16451607	EPHA2	A/I	0.19	-
1	16451612	16451613	EPHA2	A/I	0.2145	-
1	16456004	16456005	EPHA2	A/I	0.1457	-
1	16456061	16456062	EPHA2	A/I	0.1933	-
1	16456064	16456065	EPHA2	A/I	0.136	-
1	16456838	16456839	EPHA2	A/I	0.168	-
1	16456849	16456850	EPHA2	A/I	0.1768	-
1	16456875	16456876	EPHA2	A/I	0.1672	-
1	16458318	16458319	EPHA2	A/I	0.1752	-
1	16458623	16458624	EPHA2	A/I	0.1584	-
1	16458641	16458642	EPHA2	A/I	0.2183	-
1	16458653	16458654	EPHA2	A/I	0.205	-
1	16458679	16458680	EPHA2	A/I	0.2005	-
1	16458697	16458698	EPHA2	A/I	0.2478	-
1	16458716	16458717	EPHA2	A/I	0.1361	-
1	16458906	16458907	EPHA2	A/I	0.2407	-
1	16458933	16458934	EPHA2	A/I	0.195	-
1	16459768	16459769	EPHA2	A/I	0.1056	-
1	16460058	16460059	EPHA2	A/I	0.2095	-
1	16460062	16460063	EPHA2	A/I	0.15	-
1	16461667	16461668	EPHA2	A/I	0.1866	-
1	16462159	16462160	EPHA2	A/I	0.254	-
1	16464374	16464375	EPHA2	A/I	0.2155	-
1	16464393	16464394	EPHA2	A/I	0.2107	-
1	16464428	16464429	EPHA2	A/I	0.1623	-
1	16464461	16464462	EPHA2	A/I	0.1555	-
1	16464505	16464506	EPHA2	A/I	0.2494	-
1	16464556	16464557	EPHA2	A/I	0.1912	-
1	16464574	16464575	EPHA2	A/I	0.1869	-
1	16464903	16464904	EPHA2	A/I	0.1616	-
1	16474898	16474899	EPHA2	A/I	0.1457	-
1	16475105	16475106	EPHA2	A/I	0.4607	-
1	16475277	16475278	EPHA2	A/I	0.2081	-
1	16475330	16475331	EPHA2	A/I	0.2762	-
1	16475349	16475350	EPHA2	A/I	0.3568	-
1	16475389	16475390	EPHA2	A/I	0.3163	-
1	16475409	16475410	EPHA2	A/I	0.1559	-
1	16475415	16475416	EPHA2	A/I	0.342	-
1	16475435	16475436	EPHA2	A/I	0.3662	-
1	16475501	16475502	EPHA2	A/I	0.3384	-
1	16475525	16475526	EPHA2	A/I	0.1594	-
1	16475526	16475527	EPHA2	A/I	0.1547	-
1	16477400	16477401	EPHA2	A/I	0.1396	-
1	16577919	16577920	FBXO42	A/I	0.1769	-
1	16583198	16583199	FBXO42	A/I	0.1825	-
1	16583211	16583212	FBXO42	A/I	0.1965	-
1	16717874	16717875	SZRD1	A/I	0.1583	+
1	16721756	16721757	SZRD1	A/I	0.1363	+
1	16722693	16722694	SZRD1	A/I	0.2775	+
1	16722787	16722788	SZRD1	A/I	0.1522	+
1	16723050	16723051	SZRD1	A/I	0.2002	+
1	16723143	16723144	SZRD1	A/I	0.2193	+
1	16723268	16723269	SZRD1	A/I	0.2097	+
1	16723498	16723499	SZRD1	A/I	0.1915	+
1	16724149	16724150	SZRD1	A/I	0.2334	+
1	16724522	16724523	SZRD1	A/I	0.3604	+
1	16767311	16767312	NECAP2	A/I	0.1069	+
1	16767344	16767345	NECAP2	A/I	0.2029	+
1	16767346	16767347	NECAP2	A/I	0.2184	+
1	16767664	16767665	NECAP2	A/I	0.2721	+
1	16770156	16770157	NECAP2	A/I	0.2248	+
1	16785546	16785547	NECAP2	A/I	0.1154	+
1	16785805	16785806	NECAP2	A/I	0.1608	+
1	16785820	16785821	NECAP2	A/I	0.2735	+
1	16785871	16785872	NECAP2	A/I	0.1429	+
1	16785880	16785881	NECAP2	A/I	0.2042	+
1	16785946	16785947	NECAP2	A/I	0.1482	+
1	16889784	16889785	NBPF1	A/I	0.2175	-
1	16889786	16889787	NBPF1	A/I	0.3365	-
1	16889814	16889815	NBPF1	A/I	0.1205	-
1	16889827	16889828	NBPF1	A/I	0.1794	-
1	16890024	16890025	NBPF1	A/I	0.1875	-
1	16890059	16890060	NBPF1	A/I	0.2095	-
1	16890077	16890078	NBPF1	A/I	0.186	-
1	16890109	16890110	NBPF1	A/I	0.2304	-
1	16890111	16890112	NBPF1	A/I	0.1737	-
1	16890427	16890428	NBPF1	A/I	0.1671	-
1	16892171	16892172	NBPF1	A/I	0.1333	-
1	16892234	16892235	NBPF1	A/I	0.1348	-
1	16895635	16895636	NBPF1	A/I	0.1975	-
1	16902797	16902798	NBPF1	A/I	0.1498	-
1	16902970	16902971	NBPF1	A/I	0.2953	-
1	16907291	16907292	NBPF1	A/I	0.1654	-
1	16907377	16907378	NBPF1	A/I	0.2479	-
1	16907381	16907382	NBPF1	A/I	0.153	-
1	16909051	16909052	NBPF1	A/I	0.4138	-
1	16909223	16909224	NBPF1	A/I	0.1632	-
1	16909245	16909246	NBPF1	A/I	0.1749	-
1	16909247	16909248	NBPF1	A/I	0.1655	-
1	16910165	16910166	NBPF1	A/I	0.1523	-
1	16910176	16910177	NBPF1	A/I	0.1559	-
1	16915356	16915357	NBPF1	A/I	0.3742	-
1	16915528	16915529	NBPF1	A/I	0.2542	-
1	16915550	16915551	NBPF1	A/I	0.1852	-
1	16915552	16915553	NBPF1	A/I	0.2098	-
1	16935249	16935250	NBPF1	A/I	0.1079	-
1	16945100	16945101	CROCCP2	A/I	0.2271	-
1	16953779	16953780	CROCCP2	A/I	0.1827	-
1	17012190	17012191	EIF1AXP1	A/I	0.1804	-
1	17012204	17012205	EIF1AXP1	A/I	0.1831	-
1	17012210	17012211	EIF1AXP1	A/I	0.413	-
1	17012277	17012278	EIF1AXP1	A/I	0.4687	-
1	17012291	17012292	EIF1AXP1	A/I	0.3333	-
1	17012299	17012300	EIF1AXP1	A/I	0.2243	-
1	17012321	17012322	EIF1AXP1	A/I	0.2867	-
1	17012436	17012437	EIF1AXP1	A/I	0.1865	-
1	17012504	17012505	EIF1AXP1	A/I	0.3283	-
1	17012522	17012523	EIF1AXP1	A/I	0.3666	-
1	17301470	17301471	MFAP2	A/I	0.1988	-
1	17301793	17301794	MFAP2	A/I	0.219	-
1	17301814	17301815	MFAP2	A/I	0.1352	-
1	17301822	17301823	MFAP2	A/I	0.1701	-
1	17302164	17302165	MFAP2	A/I	0.1911	-
1	17302181	17302182	MFAP2	A/I	0.1702	-
1	17302188	17302189	MFAP2	A/I	0.1531	-
1	17302206	17302207	MFAP2	A/I	0.1984	-
1	17303626	17303627	MFAP2	A/I	0.1796	-
1	17312552	17312553	ATP13A2	A/I	0.2111	-
1	17312597	17312598	ATP13A2	A/I	0.1769	-
1	17312620	17312621	ATP13A2	A/I	0.2626	-
1	17312690	17312691	ATP13A2	A/I	0.1789	-
1	17312780	17312781	ATP13A2	A/I	0.2616	-
1	17313013	17313014	ATP13A2	A/I	0.2071	-
1	17313361	17313362	ATP13A2	A/I	0.1416	-
1	17313400	17313401	ATP13A2	A/I	0.2068	-
1	17314634	17314635	ATP13A2	A/I	0.2309	-
1	17314636	17314637	ATP13A2	A/I	0.3661	-
1	17314672	17314673	ATP13A2	A/I	0.3312	-
1	17314684	17314685	ATP13A2	A/I	0.1973	-
1	17314706	17314707	ATP13A2	A/I	0.2333	-
1	17314841	17314842	ATP13A2	A/I	0.2589	-
1	17314966	17314967	ATP13A2	A/I	0.1504	-
1	17316194	17316195	ATP13A2	A/I	0.1613	-
1	17316416	17316417	ATP13A2	A/I	0.1396	-
1	17316737	17316738	ATP13A2	A/I	0.1525	-
1	17318273	17318274	ATP13A2	A/I	0.2592	-
1	17318298	17318299	ATP13A2	A/I	0.1734	-
1	17318588	17318589	ATP13A2	A/I	0.1464	-
1	17319022	17319023	ATP13A2	A/I	0.1748	-
1	17320303	17320304	ATP13A2	A/I	0.3117	-
1	17322913	17322914	ATP13A2	A/I	0.1104	-
1	17322915	17322916	ATP13A2	A/I	0.1345	-
1	17322919	17322920	ATP13A2	A/I	0.3075	-
1	17322921	17322922	ATP13A2	A/I	0.2221	-
1	17323552	17323553	ATP13A2	A/I	0.107	-
1	17326506	17326507	ATP13A2	A/I	0.1524	-
1	17326779	17326780	ATP13A2	A/I	0.1824	-
1	17326907	17326908	ATP13A2	A/I	0.1165	-
1	17327012	17327013	ATP13A2	A/I	0.1698	-
1	17327015	17327016	ATP13A2	A/I	0.4184	-
1	17328564	17328565	ATP13A2	A/I	0.1832	-
1	17328586	17328587	ATP13A2	A/I	0.3211	-
1	17330835	17330836	ATP13A2	A/I	0.1468	-
1	17330863	17330864	ATP13A2	A/I	0.2497	-
1	17330865	17330866	ATP13A2	A/I	0.1681	-
1	17330886	17330887	ATP13A2	A/I	0.2911	-
1	17330889	17330890	ATP13A2	A/I	0.2858	-
1	17331888	17331889	ATP13A2	A/I	0.1122	-
1	17332211	17332212	ATP13A2	A/I	0.1648	-
1	17345264	17345265	SDHB	A/I	0.1637	-
1	17345269	17345270	SDHB	A/I	0.1663	-
1	17345278	17345279	SDHB	A/I	0.2319	-
1	17345320	17345321	SDHB	A/I	0.1734	-
1	17345327	17345328	SDHB	A/I	0.1324	-
1	17350558	17350559	SDHB	A/I	0.1056	-
1	17355116	17355117	SDHB	A/I	0.1798	-
1	17733543	17733544	RCC2	A/I	0.1222	-
1	17747299	17747300	RCC2	A/I	0.1187	-
1	19199194	19199195	ALDH4A1	A/I	0.3	-
1	19209795	19209796	ALDH4A1	A/I	0.2913	-
1	19401220	19401221	UBR4	A/I	0.1223	-
1	19414376	19414377	UBR4	A/I	0.1862	-
1	19415303	19415304	UBR4	A/I	0.3097	-
1	19415351	19415352	UBR4	A/I	0.1253	-
1	19423746	19423747	UBR4	A/I	0.1382	-
1	19426101	19426102	UBR4	A/I	0.1794	-
1	19426973	19426974	UBR4	A/I	0.157	-
1	19426975	19426976	UBR4	A/I	0.1352	-
1	19430703	19430704	UBR4	A/I	0.197	-
1	19431117	19431118	UBR4	A/I	0.1053	-
1	19433153	19433154	UBR4	A/I	0.1446	-
1	19433333	19433334	UBR4	A/I	0.1361	-
1	19433422	19433423	UBR4	A/I	0.2569	-
1	19437285	19437286	UBR4	A/I	0.1496	-
1	19439251	19439252	UBR4	A/I	0.1608	-
1	19440545	19440546	UBR4	A/I	0.1167	-
1	19441431	19441432	UBR4	A/I	0.1442	-
1	19443886	19443887	UBR4	A/I	0.1909	-
1	19446161	19446162	UBR4	A/I	0.1068	-
1	19446806	19446807	UBR4	A/I	0.1477	-
1	19449373	19449374	UBR4	A/I	0.1659	-
1	19449395	19449396	UBR4	A/I	0.1305	-
1	19451047	19451048	UBR4	A/I	0.1365	-
1	19451153	19451154	UBR4	A/I	0.1434	-
1	19452992	19452993	UBR4	A/I	0.1116	-
1	19465687	19465688	UBR4	A/I	0.1205	-
1	19470560	19470561	UBR4	A/I	0.1587	-
1	19471323	19471324	UBR4	A/I	0.1381	-
1	19473349	19473350	UBR4	A/I	0.1116	-
1	19473457	19473458	UBR4	A/I	0.1311	-
1	19474490	19474491	UBR4	A/I	0.1042	-
1	19484438	19484439	UBR4	A/I	0.1049	-
1	19487445	19487446	UBR4	A/I	0.1551	-
1	19487505	19487506	UBR4	A/I	0.1075	-
1	19488210	19488211	UBR4	A/I	0.1155	-
1	19491812	19491813	UBR4	A/I	0.1209	-
1	19492150	19492151	UBR4	A/I	0.1259	-
1	19493516	19493517	UBR4	A/I	0.1793	-
1	19493548	19493549	UBR4	A/I	0.1017	-
1	19495939	19495940	UBR4	A/I	0.1809	-
1	19499724	19499725	UBR4	A/I	0.1056	-
1	19499787	19499788	UBR4	A/I	0.1235	-
1	19500041	19500042	UBR4	A/I	0.1255	-
1	19505601	19505602	UBR4	A/I	0.111	-
1	19513081	19513082	UBR4	A/I	0.1128	-
1	19513735	19513736	UBR4	A/I	0.1371	-
1	19518812	19518813	UBR4	A/I	0.1679	-
1	19518864	19518865	UBR4	A/I	0.1291	-
1	19536606	19536607	UBR4	A/I	0.1721	-
1	19536671	19536672	UBR4	A/I	0.2083	-
1	19536682	19536683	UBR4	A/I	0.1077	-
1	19545129	19545130	EMC1	A/I	0.1476	-
1	19545594	19545595	EMC1	A/I	0.106	-
1	19545631	19545632	EMC1	A/I	0.3558	-
1	19545674	19545675	EMC1	A/I	0.1635	-
1	19545734	19545735	EMC1	A/I	0.3582	-
1	19545736	19545737	EMC1	A/I	0.1589	-
1	19545797	19545798	EMC1	A/I	0.1957	-
1	19545813	19545814	EMC1	A/I	0.1441	-
1	19545840	19545841	EMC1	A/I	0.1281	-
1	19545843	19545844	EMC1	A/I	0.1884	-
1	19545886	19545887	EMC1	A/I	0.1399	-
1	19546129	19546130	EMC1	A/I	0.1375	-
1	19546152	19546153	EMC1	A/I	0.1	-
1	19546158	19546159	EMC1	A/I	0.1258	-
1	19546179	19546180	EMC1	A/I	0.2139	-
1	19549252	19549253	EMC1	A/I	0.1341	-
1	19549272	19549273	EMC1	A/I	0.2172	-
1	19549288	19549289	EMC1	A/I	0.2225	-
1	19549297	19549298	EMC1	A/I	0.1049	-
1	19550010	19550011	EMC1	A/I	0.1903	-
1	19557438	19557439	EMC1	A/I	0.127	-
1	19557758	19557759	EMC1	A/I	0.2601	-
1	19557769	19557770	EMC1	A/I	0.1434	-
1	19557893	19557894	EMC1	A/I	0.1337	-
1	19559167	19559168	EMC1	A/I	0.2259	-
1	19559188	19559189	EMC1	A/I	0.1404	-
1	19559216	19559217	EMC1	A/I	0.1316	-
1	19559220	19559221	EMC1	A/I	0.169	-
1	19559512	19559513	EMC1	A/I	0.1667	-
1	19559574	19559575	EMC1	A/I	0.1072	-
1	19559584	19559585	EMC1	A/I	0.127	-
1	19561688	19561689	EMC1	A/I	0.1135	-
1	19563640	19563641	EMC1	A/I	0.2565	-
1	19564524	19564525	EMC1	A/I	0.1127	-
1	19564589	19564590	EMC1	A/I	0.1444	-
1	19566430	19566431	EMC1	A/I	0.1431	-
1	19566452	19566453	EMC1	A/I	0.1689	-
1	19566467	19566468	EMC1	A/I	0.2578	-
1	19567538	19567539	EMC1	A/I	0.1491	-
1	19567609	19567610	EMC1	A/I	0.2604	-
1	19568899	19568900	EMC1	A/I	0.1503	-
1	19568922	19568923	EMC1	A/I	0.2005	-
1	19570108	19570109	EMC1	A/I	0.1269	-
1	19571451	19571452	EMC1	A/I	0.1786	-
1	19571512	19571513	EMC1	A/I	0.1734	-
1	19578191	19578192	MRTO4	A/I	0.4006	+
1	19578218	19578219	MRTO4	A/I	0.1092	+
1	19583619	19583620	MRTO4	A/I	0.1272	+
1	19584335	19584336	MRTO4	A/I	0.3567	+
1	19584372	19584373	MRTO4	A/I	0.1562	+
1	19585187	19585188	MRTO4	A/I	0.134	+
1	19585293	19585294	MRTO4	A/I	0.123	+
1	19585415	19585416	MRTO4	A/I	0.1548	+
1	19585544	19585545	MRTO4	A/I	0.3497	+
1	19585553	19585554	MRTO4	A/I	0.1619	+
1	19585908	19585909	MRTO4	A/I	0.1861	+
1	19585917	19585918	MRTO4	A/I	0.1681	+
1	19585928	19585929	MRTO4	A/I	0.1375	+
1	19586101	19586102	MRTO4	A/I	0.1416	+
1	19586205	19586206	MRTO4	A/I	0.1822	+
1	19586228	19586229	MRTO4	A/I	0.2599	+
1	19586351	19586352	MRTO4	A/I	0.1576	+
1	19586574	19586575	MRTO4	A/I	0.2589	+
1	19586603	19586604	MRTO4	A/I	0.2039	+
1	19630485	19630486	AKR7A2	A/I	0.2556	-
1	19630557	19630558	AKR7A2	A/I	0.2464	-
1	19630559	19630560	AKR7A2	A/I	0.3845	-
1	19630596	19630597	AKR7A2	A/I	0.1713	-
1	19630743	19630744	AKR7A2	A/I	0.1168	-
1	19630768	19630769	AKR7A2	A/I	0.1482	-
1	19630808	19630809	AKR7A2	A/I	0.1288	-
1	19632530	19632531	AKR7A2	A/I	0.4413	-
1	19632578	19632579	AKR7A2	A/I	0.2454	-
1	19632587	19632588	AKR7A2	A/I	0.2218	-
1	19633573	19633574	AKR7A2	A/I	0.3249	-
1	19633827	19633828	AKR7A2	A/I	0.168	-
1	19633866	19633867	AKR7A2	A/I	0.1579	-
1	19633896	19633897	AKR7A2	A/I	0.2902	-
1	19634655	19634656	AKR7A2	A/I	0.3473	-
1	19634695	19634696	AKR7A2	A/I	0.1686	-
1	19635008	19635009	AKR7A2	A/I	0.1525	-
1	19635012	19635013	AKR7A2	A/I	0.1235	-
1	19635069	19635070	AKR7A2	A/I	0.1099	-
1	19638388	19638389	AKR7A2	A/I	0.4236	-
1	19655087	19655088	PQLC2	A/I	0.1682	+
1	19665669	19665670	CAPZB	A/I	0.1265	-
1	19665679	19665680	CAPZB	A/I	0.153	-
1	19665724	19665725	CAPZB	A/I	0.1147	-
1	19665799	19665800	CAPZB	A/I	0.1047	-
1	19683924	19683925	CAPZB	A/I	0.161	-
1	19684054	19684055	CAPZB	A/I	0.2286	-
1	19934678	19934679	RPS14P3	A/I	0.5524	+
1	19934687	19934688	RPS14P3	A/I	0.3058	+
1	19934703	19934704	RPS14P3	A/I	0.2399	+
1	19934724	19934725	RPS14P3	A/I	0.1668	+
1	19934829	19934830	RPS14P3	A/I	0.2718	+
1	19934877	19934878	RPS14P3	A/I	0.55	+
1	19934916	19934917	RPS14P3	A/I	0.4435	+
1	19934976	19934977	RPS14P3	A/I	0.3677	+
1	19952941	19952942	MINOS1-NBL1	A/I	0.1253	+
1	19952990	19952991	MINOS1	A/I	0.1948	+
1	19953005	19953006	MINOS1	A/I	0.1139	+
1	19981567	19981568	MINOS1-NBL1	A/I	0.1315	+
1	19984002	19984003	MINOS1-NBL1	A/I	0.1746	+
1	19984504	19984505	MINOS1-NBL1	A/I	0.1188	+
1	19984535	19984536	MINOS1-NBL1	A/I	0.1298	+
1	20237676	20237677	OTUD3	A/I	0.1646	+
1	20238237	20238238	OTUD3	A/I	0.3682	+
1	20238323	20238324	OTUD3	A/I	0.3905	+
1	20238759	20238760	OTUD3	A/I	0.1964	+
1	20826105	20826106	MUL1	A/I	0.389	-
1	20826197	20826198	MUL1	A/I	0.1249	-
1	20826240	20826241	MUL1	A/I	0.1212	-
1	20826880	20826881	MUL1	A/I	0.1285	-
1	20827087	20827088	MUL1	A/I	0.1647	-
1	20827187	20827188	MUL1	A/I	0.1082	-
1	20827192	20827193	MUL1	A/I	0.2259	-
1	20827624	20827625	MUL1	A/I	0.1397	-
1	20827653	20827654	MUL1	A/I	0.1192	-
1	20827655	20827656	MUL1	A/I	0.1388	-
1	20827723	20827724	MUL1	A/I	0.1352	-
1	20827872	20827873	MUL1	A/I	0.1244	-
1	20827899	20827900	MUL1	A/I	0.2218	-
1	20834480	20834481	MUL1	A/I	0.1177	-
1	20964343	20964344	PINK1	A/I	0.145	+
1	20964458	20964459	PINK1	A/I	0.1494	+
1	20966414	20966415	PINK1	A/I	0.1091	+
1	20966481	20966482	PINK1	A/I	0.17	+
1	20971157	20971158	PINK1	A/I	0.1372	+
1	20976772	20976773	PINK1-AS	A/I	0.1936	-
1	20977009	20977010	PINK1	A/I	0.1195	+
1	20978328	20978329	DDOST	A/I	0.1042	-
1	20978446	20978447	DDOST	A/I	0.1279	-
1	20978515	20978516	DDOST	A/I	0.1199	-
1	20978520	20978521	DDOST	A/I	0.1235	-
1	20978581	20978582	DDOST	A/I	0.1775	-
1	20978629	20978630	DDOST	A/I	0.1858	-
1	20978702	20978703	DDOST	A/I	0.1451	-
1	20978704	20978705	DDOST	A/I	0.1073	-
1	20978864	20978865	DDOST	A/I	0.2341	-
1	20978897	20978898	DDOST	A/I	0.1253	-
1	20978899	20978900	DDOST	A/I	0.2348	-
1	20978956	20978957	DDOST	A/I	0.1085	-
1	20978989	20978990	DDOST	A/I	0.2512	-
1	20979163	20979164	DDOST	A/I	0.4431	-
1	20979434	20979435	DDOST	A/I	0.1813	-
1	20980157	20980158	DDOST	A/I	0.2706	-
1	20980264	20980265	DDOST	A/I	0.1261	-
1	20980839	20980840	DDOST	A/I	0.2096	-
1	20980842	20980843	DDOST	A/I	0.1056	-
1	20980862	20980863	DDOST	A/I	0.1443	-
1	20981137	20981138	DDOST	A/I	0.3076	-
1	20982017	20982018	DDOST	A/I	0.2271	-
1	20987408	20987409	DDOST	A/I	0.1402	-
1	20987895	20987896	DDOST	A/I	0.25	-
1	20987908	20987909	DDOST	A/I	0.1686	-
1	21070599	21070600	HP1BP3	A/I	0.1521	-
1	21070601	21070602	HP1BP3	A/I	0.13	-
1	21076325	21076326	HP1BP3	A/I	0.1691	-
1	21091988	21091989	HP1BP3	A/I	0.1507	-
1	21094153	21094154	HP1BP3	A/I	0.1669	-
1	21097474	21097475	HP1BP3	A/I	0.1651	-
1	21106391	21106392	HP1BP3	A/I	0.1356	-
1	21106843	21106844	HP1BP3	A/I	0.1335	-
1	21106876	21106877	HP1BP3	A/I	0.1309	-
1	21106878	21106879	HP1BP3	A/I	0.138	-
1	21106920	21106921	HP1BP3	A/I	0.2338	-
1	21106939	21106940	HP1BP3	A/I	0.1753	-
1	21106963	21106964	HP1BP3	A/I	0.2119	-
1	21113022	21113023	HP1BP3	A/I	0.3303	-
1	21137341	21137342	EIF4G3	A/I	0.3197	-
1	21144016	21144017	EIF4G3	A/I	0.3042	-
1	21144018	21144019	EIF4G3	A/I	0.1782	-
1	21151631	21151632	EIF4G3	A/I	0.2727	-
1	21180081	21180082	EIF4G3	A/I	0.2006	-
1	21180141	21180142	EIF4G3	A/I	0.2928	-
1	21221973	21221974	EIF4G3	A/I	0.265	-
1	21226207	21226208	EIF4G3	A/I	0.3214	-
1	21268274	21268275	EIF4G3	A/I	0.1752	-
1	21502683	21502684	EIF4G3	A/I	0.1469	-
1	21502685	21502686	EIF4G3	A/I	0.1594	-
1	21503215	21503216	EIF4G3	A/I	0.1489	-
1	21503216	21503217	EIF4G3	A/I	0.107	-
1	21503228	21503229	EIF4G3	A/I	0.1027	-
1	21503254	21503255	EIF4G3	A/I	0.1213	-
1	21544422	21544423	ECE1	A/I	0.1785	-
1	21544865	21544866	ECE1	A/I	0.1633	-
1	21545601	21545602	ECE1	A/I	0.1143	-
1	21546448	21546449	ECE1	A/I	0.1342	-
1	21546466	21546467	ECE1	A/I	0.173	-
1	21554498	21554499	ECE1	A/I	0.2379	-
1	21810454	21810455	NBPF3	A/I	0.2765	+
1	21903887	21903888	ALPL	A/I	0.3302	+
1	22005816	22005817	USP48	A/I	0.2082	-
1	22005823	22005824	USP48	A/I	0.2674	-
1	22005840	22005841	USP48	A/I	0.1534	-
1	22033031	22033032	USP48	A/I	0.1945	-
1	22063080	22063081	USP48	A/I	0.131	-
1	22084226	22084227	USP48	A/I	0.1534	-
1	22357031	22357032	LINC00339	A/I	0.2341	+
1	22404945	22404946	CDC42	A/I	0.1462	+
1	22404983	22404984	CDC42	A/I	0.1253	+
1	22405016	22405017	CDC42	A/I	0.3836	+
1	22408280	22408281	CDC42	A/I	0.3034	+
1	22418682	22418683	CDC42	A/I	0.1394	+
1	22418748	22418749	CDC42	A/I	0.1135	+
1	22419394	22419395	CDC42	A/I	0.1817	+
1	22832585	22832586	ZBTB40	A/I	0.2344	+
1	22835067	22835068	ZBTB40	A/I	0.2087	+
1	22835186	22835187	ZBTB40	A/I	0.1863	+
1	22835623	22835624	ZBTB40	A/I	0.1925	+
1	22838218	22838219	ZBTB40	A/I	0.3154	+
1	22838408	22838409	ZBTB40	A/I	0.2413	+
1	22843813	22843814	ZBTB40	A/I	0.2353	+
1	22846649	22846650	ZBTB40	A/I	0.1629	+
1	22852994	22852995	ZBTB40	A/I	0.3538	+
1	22853140	22853141	ZBTB40	A/I	0.3315	+
1	22853285	22853286	ZBTB40	A/I	0.2429	+
1	22853313	22853314	ZBTB40	A/I	0.2173	+
1	22853378	22853379	ZBTB40	A/I	0.2059	+
1	22853626	22853627	ZBTB40	A/I	0.225	+
1	22853871	22853872	ZBTB40	A/I	0.2191	+
1	22854103	22854104	ZBTB40	A/I	0.2518	+
1	22854178	22854179	ZBTB40	A/I	0.1603	+
1	22854184	22854185	ZBTB40	A/I	0.1548	+
1	22854232	22854233	ZBTB40	A/I	0.2291	+
1	22854272	22854273	ZBTB40	A/I	0.3023	+
1	22854472	22854473	ZBTB40	A/I	0.1455	+
1	22854773	22854774	ZBTB40	A/I	0.2163	+
1	22890173	22890174	EPHA8	A/I	0.3523	+
1	22902859	22902860	EPHA8	A/I	0.3014	+
1	22915470	22915471	EPHA8	A/I	0.2293	+
1	22915673	22915674	EPHA8	A/I	0.4186	+
1	23346167	23346168	KDM1A	A/I	0.1745	+
1	23346394	23346395	KDM1A	A/I	0.1167	+
1	23357013	23357014	KDM1A	A/I	0.3592	+
1	23376900	23376901	KDM1A	A/I	0.152	+
1	23376998	23376999	KDM1A	A/I	0.1438	+
1	23377001	23377002	KDM1A	A/I	0.1953	+
1	23380301	23380302	KDM1A	A/I	0.15	+
1	23381594	23381595	KDM1A	A/I	0.1505	+
1	23385599	23385600	KDM1A	A/I	0.255	+
1	23385603	23385604	KDM1A	A/I	0.1548	+
1	23395070	23395071	KDM1A	A/I	0.1378	+
1	23395088	23395089	KDM1A	A/I	0.1268	+
1	23395130	23395131	KDM1A	A/I	0.1123	+
1	23395604	23395605	KDM1A	A/I	0.1119	+
1	23398630	23398631	KDM1A	A/I	0.1258	+
1	23398639	23398640	KDM1A	A/I	0.1347	+
1	23399881	23399882	KDM1A	A/I	0.1218	+
1	23399885	23399886	KDM1A	A/I	0.1666	+
1	23403755	23403756	KDM1A	A/I	0.3112	+
1	23403758	23403759	KDM1A	A/I	0.1528	+
1	23403791	23403792	KDM1A	A/I	0.2374	+
1	23403819	23403820	KDM1A	A/I	0.2816	+
1	23405581	23405582	KDM1A	A/I	0.1774	+
1	23405664	23405665	KDM1A	A/I	0.1802	+
1	23406154	23406155	KDM1A	A/I	0.1968	+
1	23407945	23407946	KDM1A	A/I	0.2405	+
1	23407966	23407967	KDM1A	A/I	0.2324	+
1	23408059	23408060	KDM1A	A/I	0.1512	+
1	23408767	23408768	KDM1A	A/I	0.3221	+
1	23408773	23408774	KDM1A	A/I	0.1301	+
1	23408818	23408819	KDM1A	A/I	0.1605	+
1	23408826	23408827	KDM1A	A/I	0.1478	+
1	23409823	23409824	KDM1A	A/I	0.1043	+
1	23409851	23409852	KDM1A	A/I	0.1098	+
1	23409860	23409861	KDM1A	A/I	0.1168	+
1	23409866	23409867	KDM1A	A/I	0.1129	+
1	23409906	23409907	KDM1A	A/I	0.3686	+
1	23409927	23409928	KDM1A	A/I	0.4156	+
1	23409974	23409975	KDM1A	A/I	0.2379	+
1	23410052	23410053	KDM1A	A/I	0.3962	+
1	23410074	23410075	KDM1A	A/I	0.2893	+
1	23410104	23410105	KDM1A	A/I	0.3087	+
1	23412304	23412305	LUZP1	A/I	0.4773	-
1	23412329	23412330	LUZP1	A/I	0.3205	-
1	23412332	23412333	LUZP1	A/I	0.2673	-
1	23412382	23412383	LUZP1	A/I	0.374	-
1	23412385	23412386	LUZP1	A/I	0.3524	-
1	23412619	23412620	LUZP1	A/I	0.2638	-
1	23415420	23415421	LUZP1	A/I	0.3312	-
1	23415438	23415439	LUZP1	A/I	0.2952	-
1	23636471	23636472	HNRNPR	A/I	0.1819	-
1	23636493	23636494	HNRNPR	A/I	0.1233	-
1	23636969	23636970	HNRNPR	A/I	0.129	-
1	23636996	23636997	HNRNPR	A/I	0.204	-
1	23637115	23637116	HNRNPR	A/I	0.1522	-
1	23650100	23650101	HNRNPR	A/I	0.1275	-
1	23660041	23660042	HNRNPR	A/I	0.3588	-
1	23664336	23664337	HNRNPR	A/I	0.178	-
1	23667354	23667355	HNRNPR	A/I	0.2843	-
1	23667382	23667383	HNRNPR	A/I	0.1829	-
1	23667399	23667400	HNRNPR	A/I	0.212	-
1	23667405	23667406	HNRNPR	A/I	0.1779	-
1	23667412	23667413	HNRNPR	A/I	0.1483	-
1	23667415	23667416	HNRNPR	A/I	0.16	-
1	23667424	23667425	HNRNPR	A/I	0.1241	-
1	23667440	23667441	HNRNPR	A/I	0.247	-
1	23667479	23667480	HNRNPR	A/I	0.1594	-
1	23667506	23667507	HNRNPR	A/I	0.2437	-
1	23670767	23670768	HNRNPR	A/I	0.2601	-
1	23686699	23686700	ZNF436	A/I	0.4166	-
1	23686702	23686703	ZNF436	A/I	0.3144	-
1	23687824	23687825	ZNF436	A/I	0.2916	-
1	23687896	23687897	ZNF436	A/I	0.3413	-
1	23688987	23688988	ZNF436	A/I	0.3053	-
1	23689083	23689084	ZNF436	A/I	0.3961	-
1	23695850	23695851	C1orf213	A/I	0.3835	+
1	23695852	23695853	C1orf213	A/I	0.3431	+
1	23695899	23695900	C1orf213	A/I	0.3151	+
1	23696046	23696047	C1orf213	A/I	0.4615	+
1	23884519	23884520	ID3	A/I	0.14	-
1	23884537	23884538	ID3	A/I	0.1227	-
1	23884539	23884540	ID3	A/I	0.1151	-
1	23884540	23884541	ID3	A/I	0.2045	-
1	23884600	23884601	ID3	A/I	0.1072	-
1	23884616	23884617	ID3	A/I	0.15	-
1	23884779	23884780	ID3	A/I	0.1393	-
1	23885707	23885708	ID3	A/I	0.1055	-
1	24018446	24018447	RPL11	A/I	0.2078	+
1	24019016	24019017	RPL11	A/I	0.3246	+
1	24020350	24020351	RPL11	A/I	0.2132	+
1	24021166	24021167	RPL11	A/I	0.1142	+
1	24021236	24021237	RPL11	A/I	0.124	+
1	24021240	24021241	RPL11	A/I	0.1895	+
1	24021289	24021290	RPL11	A/I	0.3177	+
1	24021335	24021336	RPL11	A/I	0.2435	+
1	24021342	24021343	RPL11	A/I	0.2278	+
1	24021375	24021376	RPL11	A/I	0.1086	+
1	24021385	24021386	RPL11	A/I	0.2536	+
1	24021430	24021431	RPL11	A/I	0.1411	+
1	24021439	24021440	RPL11	A/I	0.1284	+
1	24021512	24021513	RPL11	A/I	0.1675	+
1	24021530	24021531	RPL11	A/I	0.2532	+
1	24021592	24021593	RPL11	A/I	0.173	+
1	24021659	24021660	RPL11	A/I	0.2031	+
1	24021661	24021662	RPL11	A/I	0.2272	+
1	24021708	24021709	RPL11	A/I	0.1841	+
1	24021713	24021714	RPL11	A/I	0.2598	+
1	24021732	24021733	RPL11	A/I	0.3502	+
1	24021789	24021790	RPL11	A/I	0.142	+
1	24021835	24021836	RPL11	A/I	0.1437	+
1	24021838	24021839	RPL11	A/I	0.1046	+
1	24021849	24021850	RPL11	A/I	0.2296	+
1	24022411	24022412	RPL11	A/I	0.1247	+
1	24022557	24022558	RPL11	A/I	0.1288	+
1	24022861	24022862	RPL11	A/I	0.1855	+
1	24075520	24075521	TCEB3	A/I	0.2019	+
1	24075549	24075550	TCEB3	A/I	0.2439	+
1	24075551	24075552	TCEB3	A/I	0.1375	+
1	24075554	24075555	TCEB3	A/I	0.2471	+
1	24076354	24076355	TCEB3	A/I	0.2299	+
1	24076371	24076372	TCEB3	A/I	0.129	+
1	24077402	24077403	TCEB3	A/I	0.178	+
1	24077429	24077430	TCEB3	A/I	0.2348	+
1	24077465	24077466	TCEB3	A/I	0.1249	+
1	24077477	24077478	TCEB3	A/I	0.3015	+
1	24077644	24077645	TCEB3	A/I	0.3772	+
1	24077663	24077664	TCEB3	A/I	0.2514	+
1	24077675	24077676	TCEB3	A/I	0.1696	+
1	24077714	24077715	TCEB3	A/I	0.12	+
1	24077740	24077741	TCEB3	A/I	0.1247	+
1	24077780	24077781	TCEB3	A/I	0.1154	+
1	24077821	24077822	TCEB3	A/I	0.1181	+
1	24077828	24077829	TCEB3	A/I	0.1988	+
1	24077830	24077831	TCEB3	A/I	0.145	+
1	24077896	24077897	TCEB3	A/I	0.1523	+
1	24077898	24077899	TCEB3	A/I	0.1595	+
1	24077956	24077957	TCEB3	A/I	0.1404	+
1	24077980	24077981	TCEB3	A/I	0.2234	+
1	24078112	24078113	TCEB3	A/I	0.1112	+
1	24078118	24078119	TCEB3	A/I	0.1242	+
1	24078177	24078178	TCEB3	A/I	0.2075	+
1	24078193	24078194	TCEB3	A/I	0.204	+
1	24078238	24078239	TCEB3	A/I	0.2356	+
1	24078262	24078263	TCEB3	A/I	0.141	+
1	24078323	24078324	TCEB3	A/I	0.131	+
1	24078394	24078395	TCEB3	A/I	0.2152	+
1	24078403	24078404	TCEB3	A/I	0.2366	+
1	24078418	24078419	TCEB3	A/I	0.1267	+
1	24078954	24078955	TCEB3	A/I	0.3559	+
1	24080627	24080628	TCEB3	A/I	0.2424	+
1	24080661	24080662	TCEB3	A/I	0.1689	+
1	24080682	24080683	TCEB3	A/I	0.1214	+
1	24080690	24080691	TCEB3	A/I	0.1948	+
1	24080729	24080730	TCEB3	A/I	0.1533	+
1	24080934	24080935	TCEB3	A/I	0.196	+
1	24082337	24082338	TCEB3	A/I	0.1193	+
1	24082469	24082470	TCEB3	A/I	0.1484	+
1	24083575	24083576	TCEB3	A/I	0.1261	+
1	24086039	24086040	TCEB3	A/I	0.1187	+
1	24086061	24086062	TCEB3	A/I	0.422	+
1	24086106	24086107	TCEB3	A/I	0.35	+
1	24086252	24086253	TCEB3	A/I	0.1377	+
1	24087083	24087084	TCEB3	A/I	0.2572	+
1	24087426	24087427	TCEB3	A/I	0.1618	+
1	24087665	24087666	TCEB3	A/I	0.183	+
1	24087707	24087708	TCEB3	A/I	0.1523	+
1	24087725	24087726	TCEB3	A/I	0.1667	+
1	24104956	24104957	PITHD1	A/I	0.1631	+
1	24106389	24106390	PITHD1	A/I	0.1598	+
1	24112844	24112845	PITHD1	A/I	0.2404	+
1	24112868	24112869	PITHD1	A/I	0.1579	+
1	24112884	24112885	PITHD1	A/I	0.2664	+
1	24112886	24112887	PITHD1	A/I	0.1808	+
1	24113774	24113775	PITHD1	A/I	0.3218	+
1	24113857	24113858	PITHD1	A/I	0.1907	+
1	24113911	24113912	PITHD1	A/I	0.256	+
1	24114149	24114150	PITHD1	A/I	0.1226	+
1	24114556	24114557	PITHD1	A/I	0.1176	+
1	24114606	24114607	PITHD1	A/I	0.1192	+
1	24114653	24114654	PITHD1	A/I	0.1443	+
1	24114675	24114676	PITHD1	A/I	0.181	+
1	24114691	24114692	PITHD1	A/I	0.1624	+
1	24119181	24119182	LYPLA2	A/I	0.2048	+
1	24119217	24119218	LYPLA2	A/I	0.1091	+
1	24119241	24119242	LYPLA2	A/I	0.1444	+
1	24119500	24119501	LYPLA2	A/I	0.1855	+
1	24119508	24119509	LYPLA2	A/I	0.2467	+
1	24119690	24119691	LYPLA2	A/I	0.3046	+
1	24119692	24119693	LYPLA2	A/I	0.1119	+
1	24120732	24120733	LYPLA2	A/I	0.1996	+
1	24120798	24120799	LYPLA2	A/I	0.1626	+
1	24120948	24120949	LYPLA2	A/I	0.2886	+
1	24120987	24120988	LYPLA2	A/I	0.2928	+
1	24121224	24121225	LYPLA2	A/I	0.1032	+
1	24121255	24121256	LYPLA2	A/I	0.1347	+
1	24121440	24121441	LYPLA2	A/I	0.1832	+
1	24121474	24121475	LYPLA2	A/I	0.1442	+
1	24121477	24121478	LYPLA2	A/I	0.1574	+
1	24121529	24121530	LYPLA2	A/I	0.1591	+
1	24121541	24121542	LYPLA2	A/I	0.1425	+
1	24121635	24121636	LYPLA2	A/I	0.216	+
1	24122271	24122272	GALE	A/I	0.2424	-
1	24122330	24122331	GALE	A/I	0.1451	-
1	24122449	24122450	GALE	A/I	0.1694	-
1	24123216	24123217	GALE	A/I	0.1503	-
1	24123553	24123554	GALE	A/I	0.1873	-
1	24124188	24124189	GALE	A/I	0.1623	-
1	24124242	24124243	GALE	A/I	0.2922	-
1	24124305	24124306	GALE	A/I	0.1427	-
1	24128477	24128478	HMGCL	A/I	0.165	-
1	24128652	24128653	HMGCL	A/I	0.1275	-
1	24128711	24128712	HMGCL	A/I	0.1605	-
1	24128960	24128961	HMGCL	A/I	0.1511	-
1	24128966	24128967	HMGCL	A/I	0.1487	-
1	24129014	24129015	HMGCL	A/I	0.1458	-
1	24130917	24130918	HMGCL	A/I	0.1466	-
1	24134625	24134626	HMGCL	A/I	0.1411	-
1	24134676	24134677	HMGCL	A/I	0.1181	-
1	24134734	24134735	HMGCL	A/I	0.1315	-
1	24144004	24144005	HMGCL	A/I	0.151	-
1	24144006	24144007	HMGCL	A/I	0.1445	-
1	24144037	24144038	HMGCL	A/I	0.2201	-
1	24147056	24147057	HMGCL	A/I	0.1865	-
1	24171805	24171806	FUCA1	A/I	0.3668	-
1	24172006	24172007	FUCA1	A/I	0.205	-
1	24172568	24172569	FUCA1	A/I	0.1845	-
1	24172636	24172637	FUCA1	A/I	0.1909	-
1	24186339	24186340	FUCA1	A/I	0.2916	-
1	24186343	24186344	FUCA1	A/I	0.3091	-
1	24194445	24194446	FUCA1	A/I	0.2758	-
1	24194510	24194511	FUCA1	A/I	0.184	-
1	24286424	24286425	PNRC2	A/I	0.1321	+
1	24287420	24287421	PNRC2	A/I	0.1729	+
1	24287548	24287549	PNRC2	A/I	0.1333	+
1	24287555	24287556	PNRC2	A/I	0.1628	+
1	24288094	24288095	PNRC2	A/I	0.1325	+
1	24288951	24288952	PNRC2	A/I	0.1298	+
1	24289010	24289011	PNRC2	A/I	0.1317	+
1	24289040	24289041	PNRC2	A/I	0.1968	+
1	24289555	24289556	PNRC2	A/I	0.1318	+
1	24289631	24289632	PNRC2	A/I	0.2539	+
1	24289646	24289647	PNRC2	A/I	0.2727	+
1	24289685	24289686	PNRC2	A/I	0.1907	+
1	24289828	24289829	PNRC2	A/I	0.2046	+
1	24289840	24289841	PNRC2	A/I	0.1235	+
1	24289844	24289845	PNRC2	A/I	0.1965	+
1	24291816	24291817	SRSF10	A/I	0.2208	-
1	24291900	24291901	SRSF10	A/I	0.3	-
1	24292994	24292995	SRSF10	A/I	0.3203	-
1	24293041	24293042	SRSF10	A/I	0.1377	-
1	24293211	24293212	SRSF10	A/I	0.1315	-
1	24293272	24293273	SRSF10	A/I	0.1531	-
1	24293384	24293385	SRSF10	A/I	0.1232	-
1	24293484	24293485	SRSF10	A/I	0.1293	-
1	24293504	24293505	SRSF10	A/I	0.1255	-
1	24293523	24293524	SRSF10	A/I	0.2617	-
1	24293668	24293669	SRSF10	A/I	0.1373	-
1	24293772	24293773	SRSF10	A/I	0.1237	-
1	24293856	24293857	SRSF10	A/I	0.1226	-
1	24293884	24293885	SRSF10	A/I	0.1427	-
1	24293912	24293913	SRSF10	A/I	0.1468	-
1	24293914	24293915	SRSF10	A/I	0.1276	-
1	24294024	24294025	SRSF10	A/I	0.1613	-
1	24296223	24296224	SRSF10	A/I	0.2301	-
1	24296392	24296393	SRSF10	A/I	0.1233	-
1	24296543	24296544	SRSF10	A/I	0.1735	-
1	24296616	24296617	SRSF10	A/I	0.1678	-
1	24296974	24296975	SRSF10	A/I	0.221	-
1	24297023	24297024	SRSF10	A/I	0.2581	-
1	24297051	24297052	SRSF10	A/I	0.1899	-
1	24297480	24297481	SRSF10	A/I	0.1098	-
1	24297588	24297589	SRSF10	A/I	0.1353	-
1	24297599	24297600	SRSF10	A/I	0.135	-
1	24297752	24297753	SRSF10	A/I	0.1	-
1	24298343	24298344	SRSF10	A/I	0.1454	-
1	24301531	24301532	SRSF10	A/I	0.1591	-
1	24302958	24302959	SRSF10	A/I	0.2113	-
1	24303299	24303300	SRSF10	A/I	0.1711	-
1	24304408	24304409	SRSF10	A/I	0.1165	-
1	24304491	24304492	SRSF10	A/I	0.1545	-
1	24304503	24304504	SRSF10	A/I	0.2892	-
1	24304505	24304506	SRSF10	A/I	0.1655	-
1	24304524	24304525	SRSF10	A/I	0.2743	-
1	24304556	24304557	SRSF10	A/I	0.2731	-
1	24304560	24304561	SRSF10	A/I	0.1652	-
1	24304747	24304748	SRSF10	A/I	0.3574	-
1	24304755	24304756	SRSF10	A/I	0.1158	-
1	24306755	24306756	SRSF10	A/I	0.1028	-
1	24306792	24306793	SRSF10	A/I	0.2336	-
1	24306840	24306841	SRSF10	A/I	0.3479	-
1	24687409	24687410	STPG1	A/I	0.1283	-
1	24706225	24706226	STPG1	A/I	0.2679	-
1	24706243	24706244	STPG1	A/I	0.3705	-
1	24706263	24706264	STPG1	A/I	0.3115	-
1	24782753	24782754	NIPAL3	A/I	0.2583	+
1	24785459	24785460	NIPAL3	A/I	0.2052	+
1	24796076	24796077	NIPAL3	A/I	0.2916	+
1	24859664	24859665	RCAN3	A/I	0.45	+
1	24972495	24972496	SRRM1	A/I	0.3594	+
1	24972514	24972515	SRRM1	A/I	0.16	+
1	24972524	24972525	SRRM1	A/I	0.2396	+
1	24973174	24973175	SRRM1	A/I	0.2868	+
1	24973189	24973190	SRRM1	A/I	0.2659	+
1	24973204	24973205	SRRM1	A/I	0.1299	+
1	24973213	24973214	SRRM1	A/I	0.2525	+
1	24975371	24975372	SRRM1	A/I	0.1864	+
[truncated: 144,463 more rows]
