# Supplementary material for: Transcriptome-wide identification of 5-methylcytosine by deaminase and reader protein-assisted sequencing
Source: eLife. 2025 Apr 8;13:RP98166. doi: 10.7554/eLife.98166 (PMC11978299; doi:10.7554/eLife.98166)
Supplement: Supplementary file 3. — (a) DRAM-edited genes. (b) Overlapped genes with Yang et al. (c) Overlapped genes with Zhang et al. [file elife-98166-supp3.xlsx]

## Sheet: DRAM-edited genes
Supplementary file 3a. DRAM-edited genes
Gene Symbol	Ensembl ID
A1BG	ENSG00000121410
AAAS	ENSG00000094914
AACS	ENSG00000081760
AAGAB	ENSG00000103591
AAK1	ENSG00000115977
AAMDC	ENSG00000087884
AAMP	ENSG00000127837
AAR2	ENSG00000131043
AARS	ENSG00000090861
AARS2	ENSG00000124608
AARSD1	ENSG00000266967
AASDH	ENSG00000157426
AASDHPPT	ENSG00000149313
AATF	ENSG00000108270
AB019441.29	ENSG00000225200
ABC7-42389800N19.1	ENSG00000226210
ABC7-43041300I9.1	ENSG00000271153
ABCA2	ENSG00000107331
ABCA3	ENSG00000167972
ABCA7	ENSG00000064687
ABCB1	ENSG00000085563
ABCB10	ENSG00000135776
ABCB6	ENSG00000115657
ABCB7	ENSG00000131269
ABCB8	ENSG00000197150
ABCB9	ENSG00000150967
ABCC1	ENSG00000103222
ABCC4	ENSG00000125257
ABCC5	ENSG00000114770
ABCD3	ENSG00000117528
ABCD4	ENSG00000119688
ABCE1	ENSG00000164163
ABCF1	ENSG00000204574
ABCF2	ENSG00000033050
ABCF3	ENSG00000161204
ABHD10	ENSG00000144827
ABHD11	ENSG00000106077
ABHD12	ENSG00000100997
ABHD13	ENSG00000139826
ABHD14A	ENSG00000248487
ABHD14A-ACY1	ENSG00000114786
ABHD14B	ENSG00000114779
ABHD16A	ENSG00000204427
ABHD17A	ENSG00000129968
ABHD17B	ENSG00000107362
ABHD17C	ENSG00000136379
ABHD2	ENSG00000140526
ABHD3	ENSG00000158201
ABHD4	ENSG00000100439
ABHD5	ENSG00000011198
ABHD6	ENSG00000163686
ABHD8	ENSG00000127220
ABI1	ENSG00000136754
ABI2	ENSG00000138443
ABL1	ENSG00000097007
ABL2	ENSG00000143322
ABLIM1	ENSG00000099204
ABR	ENSG00000159842
ABRACL	ENSG00000146386
ABT1	ENSG00000146109
AC002056.3	ENSG00000213683
AC002075.4	ENSG00000237729
AC002310.13	ENSG00000260869
AC002398.9	ENSG00000188223
AC003002.4	ENSG00000268133
AC003002.6	ENSG00000269533
AC003005.4	ENSG00000268107
AC003006.7	ENSG00000269026
AC004057.1	ENSG00000196656
AC004074.3	ENSG00000230311
AC004076.7	ENSG00000268533
AC004381.6	ENSG00000005189
AC004453.8	ENSG00000146677
AC004463.6	ENSG00000260924
AC004797.1	ENSG00000229944
AC004878.3	ENSG00000198632
AC004967.7	ENSG00000243554
AC004980.7	ENSG00000205485
AC005076.5	ENSG00000224046
AC005562.1	ENSG00000214719
AC005822.1	ENSG00000235554
AC005884.1	ENSG00000227694
AC006486.1	ENSG00000204957
AC006486.9	ENSG00000268643
AC006538.4	ENSG00000267001
AC007040.11	ENSG00000258881
AC007229.3	ENSG00000267544
AC007318.5	ENSG00000172974
AC007956.1	ENSG00000214670
AC007969.5	ENSG00000233762
AC008132.12	ENSG00000234764
AC008440.5	ENSG00000232220
AC009245.3	ENSG00000230383
AC009403.2	ENSG00000216895
AC009404.2	ENSG00000236255
AC010468.1	ENSG00000214784
AC010547.9	ENSG00000261611
AC010642.1	ENSG00000267216
AC010894.3	ENSG00000226853
AC011330.5	ENSG00000249839
AC012146.7	ENSG00000234327
AC012360.2	ENSG00000268809
AC013283.1	ENSG00000221625
AC013394.2	ENSG00000272888
AC016292.3	ENSG00000108958
AC016708.2	ENSG00000230076
AC016734.2	ENSG00000228305
AC016739.2	ENSG00000218175
AC018738.2	ENSG00000237039
AC022431.1	ENSG00000226221
AC024560.3	ENSG00000214135
AC024592.12	ENSG00000267740
AC026271.5	ENSG00000174977
AC027307.3	ENSG00000268798
AC027612.6	ENSG00000143429
AC027763.2	ENSG00000215067
AC073072.7	ENSG00000234513
AC074117.10	ENSG00000234072
AC079250.1	ENSG00000230979
AC083899.3	ENSG00000204745
AC084018.1	ENSG00000212694
AC091729.9	ENSG00000229043
AC092299.8	ENSG00000272098
AC093106.7	ENSG00000213261
AC093323.3	ENSG00000170846
AC093616.4	ENSG00000234231
AC093642.5	ENSG00000220804
AC093838.4	ENSG00000152117
AC098973.2	ENSG00000225548
AC107983.4	ENSG00000227077
AC115618.1	ENSG00000204620
AC118138.2	ENSG00000230195
AC125232.1	ENSG00000231259
AC132192.1	ENSG00000268403
AC138031.1	ENSG00000213285
AC138035.2	ENSG00000238035
AC138783.12	ENSG00000189011
AC141586.5	ENSG00000215154
AC144530.1	ENSG00000234742
AC156455.1	ENSG00000256546
ACAA1	ENSG00000060971
ACAA2	ENSG00000167315
ACACA	ENSG00000132142
ACACB	ENSG00000076555
ACAD10	ENSG00000111271
ACAD11	ENSG00000240303
ACAD8	ENSG00000151498
ACAD9	ENSG00000177646
ACADM	ENSG00000117054
ACADS	ENSG00000122971
ACADSB	ENSG00000196177
ACADVL	ENSG00000072778
ACAP2	ENSG00000114331
ACAP3	ENSG00000131584
ACAT1	ENSG00000075239
ACAT2	ENSG00000120437
ACBD3	ENSG00000182827
ACBD5	ENSG00000107897
ACBD6	ENSG00000135847
ACD	ENSG00000102977
ACER3	ENSG00000078124
ACIN1	ENSG00000100813
ACLY	ENSG00000131473
ACN9	ENSG00000196636
ACO1	ENSG00000122729
ACO2	ENSG00000100412
ACOT1	ENSG00000184227
ACOT13	ENSG00000112304
ACOT2	ENSG00000119673
ACOT7	ENSG00000097021
ACOT8	ENSG00000101473
ACOT9	ENSG00000123130
ACOX1	ENSG00000161533
ACOX3	ENSG00000087008
ACP1	ENSG00000143727
ACP2	ENSG00000134575
ACP6	ENSG00000162836
ACPL2	ENSG00000155893
ACRC	ENSG00000147174
ACSF2	ENSG00000167107
ACSF3	ENSG00000176715
ACSL1	ENSG00000151726
ACSL3	ENSG00000123983
ACSL4	ENSG00000068366
ACSS1	ENSG00000154930
ACSS2	ENSG00000131069
ACTA1	ENSG00000143632
ACTB	ENSG00000075624
ACTG1	ENSG00000184009
ACTL6A	ENSG00000136518
ACTN1	ENSG00000072110
ACTN2	ENSG00000077522
ACTN4	ENSG00000130402
ACTR10	ENSG00000131966
ACTR1A	ENSG00000138107
ACTR1B	ENSG00000115073
ACTR2	ENSG00000138071
ACTR3	ENSG00000115091
ACTR3B	ENSG00000133627
ACTR5	ENSG00000101442
ACTR6	ENSG00000075089
ACTR8	ENSG00000113812
ACVR1	ENSG00000115170
ACVR1B	ENSG00000135503
ACVR2A	ENSG00000121989
ACVR2B	ENSG00000114739
ACY1	ENSG00000243989
ACYP1	ENSG00000119640
ACYP2	ENSG00000170634
AD000090.2	ENSG00000236144
ADA	ENSG00000196839
ADAL	ENSG00000168803
ADAM10	ENSG00000137845
ADAM11	ENSG00000073670
ADAM15	ENSG00000143537
ADAM17	ENSG00000151694
ADAM9	ENSG00000168615
ADAMTS1	ENSG00000154734
ADAMTS13	ENSG00000160323
ADAP1	ENSG00000105963
ADAR	ENSG00000160710
ADARB1	ENSG00000197381
ADAT1	ENSG00000065457
ADAT2	ENSG00000189007
ADAT3	ENSG00000213638
ADC	ENSG00000142920
ADCK1	ENSG00000063761
ADCK2	ENSG00000133597
ADCK3	ENSG00000163050
ADCK4	ENSG00000123815
ADCY1	ENSG00000164742
ADCY3	ENSG00000138031
ADCY6	ENSG00000174233
ADCY9	ENSG00000162104
ADD1	ENSG00000087274
ADD2	ENSG00000075340
ADD3	ENSG00000148700
ADH5	ENSG00000197894
ADI1	ENSG00000182551
ADIPOR1	ENSG00000159346
ADIPOR2	ENSG00000006831
ADK	ENSG00000156110
ADM	ENSG00000148926
ADM5	ENSG00000224420
ADNP	ENSG00000101126
ADNP2	ENSG00000101544
ADO	ENSG00000181915
ADORA2A	ENSG00000128271
ADORA2B	ENSG00000170425
ADPGK	ENSG00000159322
ADPRHL2	ENSG00000116863
ADPRM	ENSG00000170222
ADRA2C	ENSG00000184160
ADRBK1	ENSG00000173020
ADRBK2	ENSG00000100077
ADRM1	ENSG00000130706
ADSL	ENSG00000239900
ADSS	ENSG00000035687
AEBP2	ENSG00000139154
AEN	ENSG00000181026
AES	ENSG00000104964
AF196779.12	ENSG00000250232
AFAP1	ENSG00000196526
AFAP1L1	ENSG00000157510
AFF1	ENSG00000172493
AFF4	ENSG00000072364
AFG3L1P	ENSG00000223959
AFG3L2	ENSG00000141385
AFMID	ENSG00000183077
AFTPH	ENSG00000119844
AGA	ENSG00000038002
AGAP1	ENSG00000157985
AGAP10	ENSG00000204172
AGAP2-AS1	ENSG00000255737
AGAP3	ENSG00000133612
AGAP4	ENSG00000188234
AGAP5	ENSG00000172650
AGAP6	ENSG00000204149
AGAP7	ENSG00000204169
AGAP8	ENSG00000174194
AGAP9	ENSG00000198035
AGBL3	ENSG00000146856
AGBL5	ENSG00000084693
AGFG1	ENSG00000173744
AGGF1	ENSG00000164252
AGK	ENSG00000006530
AGL	ENSG00000162688
AGO1	ENSG00000092847
AGO2	ENSG00000123908
AGO3	ENSG00000126070
AGO4	ENSG00000134698
AGPAT1	ENSG00000204310
AGPAT2	ENSG00000169692
AGPAT3	ENSG00000160216
AGPAT4	ENSG00000026652
AGPAT5	ENSG00000155189
AGPAT6	ENSG00000158669
AGPAT9	ENSG00000138678
AGPS	ENSG00000018510
AGRN	ENSG00000188157
AGTPBP1	ENSG00000135049
AGTRAP	ENSG00000177674
AHCTF1	ENSG00000153207
AHCY	ENSG00000101444
AHCYL1	ENSG00000168710
AHCYL2	ENSG00000158467
AHDC1	ENSG00000126705
AHI1	ENSG00000135541
AHNAK	ENSG00000124942
AHRR	ENSG00000063438
AHSA1	ENSG00000100591
AHSA2	ENSG00000173209
AHSP	ENSG00000169877
AIDA	ENSG00000186063
AIF1L	ENSG00000126878
AIFM1	ENSG00000156709
AIG1	ENSG00000146416
AIMP1	ENSG00000164022
AIMP2	ENSG00000106305
AIP	ENSG00000110711
AJ271736.10	ENSG00000270726
AJUBA	ENSG00000129474
AK1	ENSG00000106992
AK2	ENSG00000004455
AK3	ENSG00000147853
AK4	ENSG00000162433
AKAP1	ENSG00000121057
AKAP10	ENSG00000108599
AKAP11	ENSG00000023516
AKAP12	ENSG00000131016
AKAP13	ENSG00000170776
AKAP17A	ENSG00000197976
AKAP8	ENSG00000105127
AKAP8L	ENSG00000011243
AKAP9	ENSG00000127914
AKIP1	ENSG00000166452
AKIRIN1	ENSG00000174574
AKIRIN2	ENSG00000135334
AKNA	ENSG00000106948
AKR1A1	ENSG00000117448
AKR1B1	ENSG00000085662
AKR7A2	ENSG00000053371
AKT1	ENSG00000142208
AKT1S1	ENSG00000204673
AKT2	ENSG00000105221
AKT3	ENSG00000117020
AKTIP	ENSG00000166971
AL021546.6	ENSG00000111780
AL161915.1	ENSG00000212670
AL589743.1	ENSG00000225210
AL592284.1	ENSG00000231360
AL627309.1	ENSG00000237683
AL672183.2	ENSG00000233084
ALAD	ENSG00000148218
ALAS1	ENSG00000023330
ALCAM	ENSG00000170017
ALDH16A1	ENSG00000161618
ALDH18A1	ENSG00000059573
ALDH1A2	ENSG00000128918
ALDH1B1	ENSG00000137124
ALDH1L2	ENSG00000136010
ALDH2	ENSG00000111275
ALDH3A2	ENSG00000072210
ALDH4A1	ENSG00000159423
ALDH5A1	ENSG00000112294
ALDH6A1	ENSG00000119711
ALDH7A1	ENSG00000164904
ALDH9A1	ENSG00000143149
ALDOA	ENSG00000149925
ALDOC	ENSG00000109107
ALG1	ENSG00000033011
ALG11	ENSG00000253710
ALG12	ENSG00000182858
ALG13	ENSG00000101901
ALG14	ENSG00000172339
ALG2	ENSG00000119523
ALG3	ENSG00000214160
ALG5	ENSG00000120697
ALG6	ENSG00000088035
ALG8	ENSG00000159063
ALG9	ENSG00000086848
ALKBH1	ENSG00000100601
ALKBH2	ENSG00000189046
ALKBH3	ENSG00000166199
ALKBH4	ENSG00000160993
ALKBH5	ENSG00000091542
ALKBH6	ENSG00000239382
ALKBH7	ENSG00000125652
ALKBH8	ENSG00000137760
ALMS1	ENSG00000116127
ALPL	ENSG00000162551
ALS2	ENSG00000003393
ALYREF	ENSG00000183684
AMBRA1	ENSG00000110497
AMD1	ENSG00000123505
AMFR	ENSG00000159461
AMH	ENSG00000104899
AMIGO3	ENSG00000176020
AMMECR1	ENSG00000101935
AMMECR1L	ENSG00000144233
AMOT	ENSG00000126016
AMOTL1	ENSG00000166025
AMOTL2	ENSG00000114019
AMPD2	ENSG00000116337
AMY2B	ENSG00000240038
AMZ2	ENSG00000196704
AMZ2P1	ENSG00000214174
ANAPC1	ENSG00000153107
ANAPC10	ENSG00000164162
ANAPC11	ENSG00000141552
ANAPC13	ENSG00000129055
ANAPC15	ENSG00000110200
ANAPC16	ENSG00000166295
ANAPC2	ENSG00000176248
ANAPC4	ENSG00000053900
ANAPC5	ENSG00000089053
ANAPC7	ENSG00000196510
ANGEL1	ENSG00000013523
ANGEL2	ENSG00000174606
ANKFY1	ENSG00000185722
ANKH	ENSG00000154122
ANKHD1	ENSG00000131503
ANKIB1	ENSG00000001629
ANKLE2	ENSG00000176915
ANKMY2	ENSG00000106524
ANKRA2	ENSG00000164331
ANKRD10	ENSG00000088448
ANKRD11	ENSG00000167522
ANKRD13A	ENSG00000076513
ANKRD13B	ENSG00000198720
ANKRD13C	ENSG00000118454
ANKRD13D	ENSG00000172932
ANKRD17	ENSG00000132466
ANKRD18A	ENSG00000180071
ANKRD19P	ENSG00000187984
ANKRD27	ENSG00000105186
ANKRD28	ENSG00000206560
ANKRD32	ENSG00000133302
ANKRD36	ENSG00000135976
ANKRD36B	ENSG00000196912
ANKRD39	ENSG00000213337
ANKRD40	ENSG00000154945
ANKRD42	ENSG00000137494
ANKRD46	ENSG00000186106
ANKRD49	ENSG00000168876
ANKRD52	ENSG00000139645
ANKRD54	ENSG00000100124
ANKRD6	ENSG00000135299
ANKRD9	ENSG00000156381
ANKS1A	ENSG00000064999
ANKS3	ENSG00000168096
ANKS6	ENSG00000165138
ANKZF1	ENSG00000163516
ANLN	ENSG00000011426
ANO10	ENSG00000160746
ANO6	ENSG00000177119
ANP32A	ENSG00000140350
ANP32B	ENSG00000136938
ANP32E	ENSG00000143401
ANTXR1	ENSG00000169604
ANXA11	ENSG00000122359
ANXA2	ENSG00000182718
ANXA2P2	ENSG00000231991
ANXA4	ENSG00000196975
ANXA5	ENSG00000164111
ANXA6	ENSG00000197043
ANXA7	ENSG00000138279
AOC2	ENSG00000131480
AOC3	ENSG00000131471
AP000251.3	ENSG00000237594
AP000275.65	ENSG00000265590
AP000350.10	ENSG00000251357
AP000356.1	ENSG00000240906
AP000525.9	ENSG00000206195
AP000580.1	ENSG00000219529
AP000936.1	ENSG00000234268
AP001412.1	ENSG00000272948
AP006216.11	ENSG00000231611
AP006222.2	ENSG00000228463
AP1AR	ENSG00000138660
AP1B1	ENSG00000100280
AP1G1	ENSG00000166747
AP1G2	ENSG00000213983
AP1M1	ENSG00000072958
AP1S1	ENSG00000106367
AP1S2	ENSG00000182287
AP2A1	ENSG00000196961
AP2A2	ENSG00000183020
AP2B1	ENSG00000006125
AP2M1	ENSG00000161203
AP2S1	ENSG00000042753
AP3B1	ENSG00000132842
AP3D1	ENSG00000065000
AP3M1	ENSG00000185009
AP3M2	ENSG00000070718
AP3S1	ENSG00000177879
AP3S2	ENSG00000157823
AP4B1	ENSG00000134262
AP4E1	ENSG00000081014
AP4M1	ENSG00000221838
AP5B1	ENSG00000254470
AP5M1	ENSG00000053770
AP5S1	ENSG00000125843
AP5Z1	ENSG00000242802
APAF1	ENSG00000120868
APBA2	ENSG00000034053
APBA3	ENSG00000011132
APBB1	ENSG00000166313
APBB2	ENSG00000163697
APBB3	ENSG00000113108
APC	ENSG00000134982
APEH	ENSG00000164062
APEX1	ENSG00000100823
APEX2	ENSG00000169188
APH1A	ENSG00000117362
API5	ENSG00000166181
APIP	ENSG00000149089
APITD1	ENSG00000175279
APITD1-CORT	ENSG00000251503
APLP1	ENSG00000105290
APLP2	ENSG00000084234
APMAP	ENSG00000101474
APOA1BP	ENSG00000163382
APOBEC3B	ENSG00000179750
APOBEC3C	ENSG00000244509
APOBEC3D	ENSG00000243811
APOC1	ENSG00000130208
APOE	ENSG00000130203
APOL2	ENSG00000128335
APOLD1	ENSG00000178878
APOO	ENSG00000184831
APOOL	ENSG00000155008
APOPT1	ENSG00000256053
APP	ENSG00000142192
APPBP2	ENSG00000062725
APPL1	ENSG00000157500
APPL2	ENSG00000136044
APRT	ENSG00000198931
APTX	ENSG00000137074
AQP3	ENSG00000165272
AQR	ENSG00000021776
ARAF	ENSG00000078061
ARAP1	ENSG00000186635
ARCN1	ENSG00000095139
AREL1	ENSG00000119682
ARF1	ENSG00000143761
ARF3	ENSG00000134287
ARF4	ENSG00000168374
ARF5	ENSG00000004059
ARF6	ENSG00000165527
ARFGAP1	ENSG00000101199
ARFGAP2	ENSG00000149182
ARFGAP3	ENSG00000242247
ARFGEF1	ENSG00000066777
ARFGEF2	ENSG00000124198
ARFIP1	ENSG00000164144
ARFIP2	ENSG00000132254
ARG2	ENSG00000081181
ARGLU1	ENSG00000134884
ARHGAP1	ENSG00000175220
ARHGAP10	ENSG00000071205
ARHGAP11A	ENSG00000198826
ARHGAP17	ENSG00000140750
ARHGAP19	ENSG00000213390
ARHGAP19-SLIT1	ENSG00000269891
ARHGAP21	ENSG00000107863
ARHGAP29	ENSG00000137962
ARHGAP32	ENSG00000134909
ARHGAP33	ENSG00000004777
ARHGAP35	ENSG00000160007
ARHGAP44	ENSG00000006740
ARHGAP5	ENSG00000100852
ARHGAP8	ENSG00000241484
ARHGDIA	ENSG00000141522
ARHGDIG	ENSG00000242173
ARHGEF1	ENSG00000076928
ARHGEF10	ENSG00000104728
ARHGEF10L	ENSG00000074964
ARHGEF11	ENSG00000132694
ARHGEF12	ENSG00000196914
ARHGEF18	ENSG00000104880
ARHGEF2	ENSG00000116584
ARHGEF25	ENSG00000240771
ARHGEF3	ENSG00000163947
ARHGEF39	ENSG00000137135
ARHGEF7	ENSG00000102606
ARHGEF9	ENSG00000131089
ARID1A	ENSG00000117713
ARID1B	ENSG00000049618
ARID2	ENSG00000189079
ARID3A	ENSG00000116017
ARID3B	ENSG00000179361
ARID4A	ENSG00000032219
ARID4B	ENSG00000054267
ARID5A	ENSG00000196843
ARID5B	ENSG00000150347
ARIH1	ENSG00000166233
ARIH2	ENSG00000177479
ARL1	ENSG00000120805
ARL13B	ENSG00000169379
ARL14EP	ENSG00000152219
ARL16	ENSG00000214087
ARL17A	ENSG00000185829
ARL17B	ENSG00000228696
ARL2	ENSG00000213465
ARL2BP	ENSG00000102931
ARL3	ENSG00000138175
ARL4A	ENSG00000122644
ARL4C	ENSG00000188042
ARL4D	ENSG00000175906
ARL5A	ENSG00000162980
ARL5B	ENSG00000165997
ARL6	ENSG00000113966
ARL6IP1	ENSG00000170540
ARL6IP4	ENSG00000182196
ARL6IP5	ENSG00000144746
ARL6IP6	ENSG00000177917
ARL8A	ENSG00000143862
ARL8B	ENSG00000134108
ARL9	ENSG00000196503
ARMC1	ENSG00000104442
ARMC10	ENSG00000170632
ARMC5	ENSG00000140691
ARMC6	ENSG00000105676
ARMC7	ENSG00000125449
ARMC8	ENSG00000114098
ARMC9	ENSG00000135931
ARMCX3	ENSG00000102401
ARMCX5	ENSG00000125962
ARMCX6	ENSG00000198960
ARNT	ENSG00000143437
ARNT2	ENSG00000172379
ARNTL	ENSG00000133794
ARNTL2	ENSG00000029153
ARPC1A	ENSG00000241685
ARPC1B	ENSG00000130429
ARPC2	ENSG00000163466
ARPC3	ENSG00000111229
ARPC4	ENSG00000241553
ARPC4-TTLL3	ENSG00000250151
ARPC5	ENSG00000162704
ARPC5L	ENSG00000136950
ARPP19	ENSG00000128989
ARRB2	ENSG00000141480
ARRDC1	ENSG00000197070
ARRDC2	ENSG00000105643
ARRDC3	ENSG00000113369
ARRDC4	ENSG00000140450
ARV1	ENSG00000173409
ARVCF	ENSG00000099889
AS3MT	ENSG00000214435
ASAH1	ENSG00000104763
ASAP1	ENSG00000153317
ASAP2	ENSG00000151693
ASB1	ENSG00000065802
ASB13	ENSG00000196372
ASB3	ENSG00000270898
ASB6	ENSG00000148331
ASB7	ENSG00000183475
ASB8	ENSG00000177981
ASCC1	ENSG00000138303
ASCC2	ENSG00000100325
ASCC3	ENSG00000112249
ASF1A	ENSG00000111875
ASF1B	ENSG00000105011
ASH1L	ENSG00000116539
ASH2L	ENSG00000129691
ASIC1	ENSG00000110881
ASL	ENSG00000126522
ASMTL	ENSG00000169093
ASNA1	ENSG00000198356
ASNS	ENSG00000070669
ASNSD1	ENSG00000138381
ASNSP1	ENSG00000248498
ASPH	ENSG00000198363
ASPHD2	ENSG00000128203
ASPM	ENSG00000066279
ASPSCR1	ENSG00000169696
ASRGL1	ENSG00000162174
ASS1	ENSG00000130707
ASTE1	ENSG00000034533
ASUN	ENSG00000064102
ASXL1	ENSG00000171456
ASXL2	ENSG00000143970
ATAD1	ENSG00000138138
ATAD2	ENSG00000156802
ATAD3A	ENSG00000197785
ATAD3B	ENSG00000160072
ATAD3C	ENSG00000215915
ATAD5	ENSG00000176208
ATAT1	ENSG00000137343
ATE1	ENSG00000107669
ATF1	ENSG00000123268
ATF2	ENSG00000115966
ATF3	ENSG00000162772
ATF4	ENSG00000128272
ATF4P3	ENSG00000228218
ATF5	ENSG00000169136
ATF6	ENSG00000118217
ATF6B	ENSG00000213676
ATF7	ENSG00000170653
ATF7IP	ENSG00000171681
ATF7IP2	ENSG00000166669
ATG12	ENSG00000145782
ATG13	ENSG00000175224
ATG14	ENSG00000126775
ATG16L1	ENSG00000085978
ATG2A	ENSG00000110046
ATG2B	ENSG00000066739
ATG3	ENSG00000144848
ATG4A	ENSG00000101844
ATG4B	ENSG00000168397
ATG4C	ENSG00000125703
ATG4D	ENSG00000130734
ATG5	ENSG00000057663
ATG7	ENSG00000197548
ATG9A	ENSG00000198925
ATIC	ENSG00000138363
ATL2	ENSG00000119787
ATL3	ENSG00000184743
ATM	ENSG00000149311
ATMIN	ENSG00000166454
ATN1	ENSG00000111676
ATOX1	ENSG00000177556
ATP11A	ENSG00000068650
ATP11B	ENSG00000058063
ATP11C	ENSG00000101974
ATP13A1	ENSG00000105726
ATP13A2	ENSG00000159363
ATP13A3	ENSG00000133657
ATP1A1	ENSG00000163399
ATP1A3	ENSG00000105409
ATP1B1	ENSG00000143153
ATP1B3	ENSG00000069849
ATP2A2	ENSG00000174437
ATP2B1	ENSG00000070961
ATP2B4	ENSG00000058668
ATP2C1	ENSG00000017260
ATP5A1	ENSG00000152234
ATP5B	ENSG00000110955
ATP5C1	ENSG00000165629
ATP5D	ENSG00000099624
ATP5E	ENSG00000124172
ATP5F1	ENSG00000116459
ATP5G1	ENSG00000159199
ATP5G2	ENSG00000135390
ATP5G3	ENSG00000154518
ATP5H	ENSG00000167863
ATP5I	ENSG00000169020
ATP5J	ENSG00000154723
ATP5J2	ENSG00000241468
ATP5J2-PTCD1	ENSG00000248919
ATP5L	ENSG00000167283
ATP5O	ENSG00000241837
ATP5SL	ENSG00000105341
ATP6AP1	ENSG00000071553
ATP6AP2	ENSG00000182220
ATP6C	ENSG00000259784
ATP6V0A1	ENSG00000033627
ATP6V0A2	ENSG00000185344
ATP6V0B	ENSG00000117410
ATP6V0C	ENSG00000185883
ATP6V0D1	ENSG00000159720
ATP6V0E1	ENSG00000113732
ATP6V0E2	ENSG00000171130
ATP6V1A	ENSG00000114573
ATP6V1B2	ENSG00000147416
ATP6V1C1	ENSG00000155097
ATP6V1D	ENSG00000100554
ATP6V1E1	ENSG00000131100
ATP6V1E2	ENSG00000250565
ATP6V1F	ENSG00000128524
ATP6V1G1	ENSG00000136888
ATP6V1G2-DDX39B	ENSG00000254870
ATP6V1H	ENSG00000047249
ATP7B	ENSG00000123191
ATP8B2	ENSG00000143515
ATP9A	ENSG00000054793
ATP9B	ENSG00000166377
ATPAF1	ENSG00000123472
ATPAF2	ENSG00000171953
ATPIF1	ENSG00000130770
ATR	ENSG00000175054
ATRAID	ENSG00000138085
ATRIP	ENSG00000164053
ATRN	ENSG00000088812
ATRX	ENSG00000085224
ATXN10	ENSG00000130638
ATXN1L	ENSG00000224470
ATXN2	ENSG00000204842
ATXN2L	ENSG00000168488
ATXN3	ENSG00000066427
ATXN7	ENSG00000163635
ATXN7L2	ENSG00000162650
ATXN7L3	ENSG00000087152
ATXN7L3B	ENSG00000253719
AUNIP	ENSG00000127423
AUP1	ENSG00000115307
AURKA	ENSG00000087586
AURKAIP1	ENSG00000175756
AURKB	ENSG00000178999
AUTS2	ENSG00000158321
AVEN	ENSG00000169857
AVL9	ENSG00000105778
AVPI1	ENSG00000119986
AXIN1	ENSG00000103126
AXIN2	ENSG00000168646
AZI1	ENSG00000141577
AZI2	ENSG00000163512
AZIN1	ENSG00000155096
B2M	ENSG00000166710
B3GALNT2	ENSG00000162885
B3GALT6	ENSG00000176022
B3GALTL	ENSG00000187676
B3GAT3	ENSG00000149541
B3GNT1	ENSG00000174684
B3GNT2	ENSG00000170340
B4GALNT1	ENSG00000135454
B4GALNT3	ENSG00000139044
B4GALNT4	ENSG00000182272
B4GALT1	ENSG00000086062
B4GALT2	ENSG00000117411
B4GALT3	ENSG00000158850
B4GALT4	ENSG00000121578
B4GALT5	ENSG00000158470
B4GALT7	ENSG00000027847
B9D1	ENSG00000108641
B9D2	ENSG00000123810
BAAT	ENSG00000136881
BABAM1	ENSG00000105393
BACE1	ENSG00000186318
BACE2	ENSG00000182240
BACH1	ENSG00000156273
BAD	ENSG00000002330
BAG1	ENSG00000107262
BAG2	ENSG00000112208
BAG3	ENSG00000151929
BAG4	ENSG00000156735
BAG5	ENSG00000166170
BAG6	ENSG00000204463
BAHD1	ENSG00000140320
BAI1	ENSG00000181790
BAI2	ENSG00000121753
BAIAP2	ENSG00000175866
BAIAP2L1	ENSG00000006453
BAK1	ENSG00000030110
BAK1P1	ENSG00000175730
BAMBI	ENSG00000095739
BANF1	ENSG00000175334
BANP	ENSG00000172530
BAP1	ENSG00000163930
BARD1	ENSG00000138376
BARX1	ENSG00000131668
BARX2	ENSG00000043039
BATF3	ENSG00000123685
BAX	ENSG00000087088
BAZ1A	ENSG00000198604
BAZ1B	ENSG00000009954
BAZ2A	ENSG00000076108
BBC3	ENSG00000105327
BBIP1	ENSG00000214413
BBS10	ENSG00000179941
BBS2	ENSG00000125124
BBS4	ENSG00000140463
BBS7	ENSG00000138686
BBS9	ENSG00000122507
BBX	ENSG00000114439
BCAM	ENSG00000187244
BCAP29	ENSG00000075790
BCAP31	ENSG00000185825
BCAR1	ENSG00000050820
BCAS2	ENSG00000116752
BCAS3	ENSG00000141376
BCAS4	ENSG00000124243
BCAT1	ENSG00000060982
BCAT2	ENSG00000105552
BCCIP	ENSG00000107949
BCDIN3D	ENSG00000186666
BCKDK	ENSG00000103507
BCL10	ENSG00000142867
BCL11A	ENSG00000119866
BCL2L1	ENSG00000171552
BCL2L11	ENSG00000153094
BCL2L12	ENSG00000126453
BCL2L13	ENSG00000099968
BCL2L2	ENSG00000129473
BCL2L2-PABPN1	ENSG00000258643
BCL6B	ENSG00000161940
BCL7A	ENSG00000110987
BCL7B	ENSG00000106635
BCL7C	ENSG00000099385
BCL9	ENSG00000116128
BCLAF1	ENSG00000029363
BCOR	ENSG00000183337
BCORL1	ENSG00000085185
BCR	ENSG00000186716
BCRP2	ENSG00000169668
BCS1L	ENSG00000074582
BCYRN1	ENSG00000236824
BDH2	ENSG00000164039
BDP1	ENSG00000145734
BECN1	ENSG00000126581
BEND3	ENSG00000178409
BEND7	ENSG00000165626
BET1	ENSG00000105829
BET1L	ENSG00000177951
BEX1	ENSG00000133169
BEX2	ENSG00000133134
BEX4	ENSG00000102409
BEX5	ENSG00000184515
BFAR	ENSG00000103429
BFSP1	ENSG00000125864
BHLHB9	ENSG00000198908
BHLHE40	ENSG00000134107
BICD1	ENSG00000151746
BICD2	ENSG00000185963
BID	ENSG00000015475
BIN1	ENSG00000136717
BIN3	ENSG00000147439
BIRC2	ENSG00000110330
BIRC5	ENSG00000089685
BIRC6	ENSG00000115760
BIVM	ENSG00000134897
BLCAP	ENSG00000166619
BLM	ENSG00000197299
BLMH	ENSG00000108578
BLOC1S2	ENSG00000196072
BLOC1S3	ENSG00000189114
BLOC1S4	ENSG00000186222
BLOC1S5	ENSG00000188428
BLOC1S5-TXNDC5	ENSG00000259040
BLOC1S6	ENSG00000104164
BLVRA	ENSG00000106605
BLVRB	ENSG00000090013
BLZF1	ENSG00000117475
BMI1	ENSG00000168283
BMP1	ENSG00000168487
BMP2	ENSG00000125845
BMP2K	ENSG00000138756
BMP4	ENSG00000125378
BMP7	ENSG00000101144
BMP8B	ENSG00000116985
BMPR1A	ENSG00000107779
BMPR2	ENSG00000204217
BMS1	ENSG00000165733
BMS1P1	ENSG00000204177
BMS1P10	ENSG00000237238
BMS1P20	ENSG00000236850
BMS1P5	ENSG00000204164
BMS1P6	ENSG00000251070
BMS1P7	ENSG00000243899
BNIP1	ENSG00000113734
BNIP2	ENSG00000140299
BNIP3	ENSG00000176171
BNIP3L	ENSG00000104765
BOC	ENSG00000144857
BOD1	ENSG00000145919
BOD1L1	ENSG00000038219
BOLA1	ENSG00000178096
BOLA2	ENSG00000183336
BOLA2B	ENSG00000169627
BOLA3	ENSG00000163170
BOP1	ENSG00000170727
BORA	ENSG00000136122
BPGM	ENSG00000172331
BPHL	ENSG00000137274
BPNT1	ENSG00000162813
BPTF	ENSG00000171634
BRAF	ENSG00000157764
BRAP	ENSG00000089234
BRAT1	ENSG00000106009
BRCA1	ENSG00000012048
BRCA2	ENSG00000139618
BRCC3	ENSG00000185515
BRD1	ENSG00000100425
BRD2	ENSG00000204256
BRD3	ENSG00000169925
BRD4	ENSG00000141867
BRD7	ENSG00000166164
BRD8	ENSG00000112983
BRD9	ENSG00000028310
BRE	ENSG00000158019
BRF1	ENSG00000185024
BRF2	ENSG00000104221
BRI3	ENSG00000164713
BRI3BP	ENSG00000184992
BRIP1	ENSG00000136492
BRIX1	ENSG00000113460
BRK1	ENSG00000254999
BRMS1	ENSG00000174744
BRMS1L	ENSG00000100916
BROX	ENSG00000162819
BRPF1	ENSG00000156983
BRPF3	ENSG00000096070
BRSK1	ENSG00000160469
BRSK2	ENSG00000174672
BRWD1	ENSG00000185658
BRWD3	ENSG00000165288
BSCL2	ENSG00000168000
BSDC1	ENSG00000160058
BSG	ENSG00000172270
BSN	ENSG00000164061
BST2	ENSG00000130303
BTAF1	ENSG00000095564
BTBD1	ENSG00000064726
BTBD10	ENSG00000148925
BTBD2	ENSG00000133243
BTBD3	ENSG00000132640
BTBD6	ENSG00000184887
BTBD7	ENSG00000011114
BTD	ENSG00000169814
BTF3	ENSG00000145741
BTF3L4	ENSG00000134717
BTF3L4P2	ENSG00000213189
BTG1	ENSG00000133639
BTG2	ENSG00000159388
BTG3	ENSG00000154640
BTN2A1	ENSG00000112763
BTN2A2	ENSG00000124508
BTN2A3P	ENSG00000124549
BTN3A1	ENSG00000026950
BTN3A2	ENSG00000186470
BTN3A3	ENSG00000111801
BTRC	ENSG00000166167
BUB1	ENSG00000169679
BUB1B	ENSG00000156970
BUB3	ENSG00000154473
BUD13	ENSG00000137656
BUD31	ENSG00000106245
BVES	ENSG00000112276
BX936347.1	ENSG00000197180
BYSL	ENSG00000112578
BZW1	ENSG00000082153
BZW1P2	ENSG00000198406
BZW2	ENSG00000136261
C10orf118	ENSG00000165813
C10orf2	ENSG00000107815
C10orf32	ENSG00000166275
C10orf32-ASMT	ENSG00000270316
C10orf35	ENSG00000171224
C10orf76	ENSG00000120029
C10orf88	ENSG00000119965
C11orf1	ENSG00000137720
C11orf24	ENSG00000171067
C11orf30	ENSG00000158636
C11orf31	ENSG00000211450
C11orf48	ENSG00000162194
C11orf49	ENSG00000149179
C11orf54	ENSG00000182919
C11orf57	ENSG00000150776
C11orf58	ENSG00000110696
C11orf63	ENSG00000109944
C11orf68	ENSG00000175573
C11orf71	ENSG00000180425
C11orf73	ENSG00000149196
C11orf74	ENSG00000166352
C11orf82	ENSG00000165490
C11orf83	ENSG00000204922
C11orf84	ENSG00000168005
C11orf95	ENSG00000188070
C12orf10	ENSG00000139637
C12orf23	ENSG00000151135
C12orf29	ENSG00000133641
C12orf4	ENSG00000047621
C12orf43	ENSG00000157895
C12orf44	ENSG00000123395
C12orf45	ENSG00000151131
C12orf49	ENSG00000111412
C12orf5	ENSG00000078237
C12orf57	ENSG00000111678
C12orf65	ENSG00000130921
C12orf66	ENSG00000174206
C12orf73	ENSG00000204954
C12orf75	ENSG00000235162
C12orf76	ENSG00000174456
C14orf1	ENSG00000133935
C14orf119	ENSG00000179933
C14orf142	ENSG00000170270
C14orf166	ENSG00000087302
C14orf2	ENSG00000156411
C14orf37	ENSG00000139971
C14orf79	ENSG00000140104
C14orf93	ENSG00000100802
C15orf27	ENSG00000169758
C15orf38	ENSG00000242498
C15orf38-AP3S2	ENSG00000250021
C15orf39	ENSG00000167173
C15orf40	ENSG00000169609
C15orf41	ENSG00000186073
C15orf57	ENSG00000128891
C15orf61	ENSG00000189227
C16orf13	ENSG00000130731
C16orf52	ENSG00000185716
C16orf58	ENSG00000140688
C16orf59	ENSG00000162062
C16orf62	ENSG00000103544
C16orf70	ENSG00000125149
C16orf72	ENSG00000182831
C16orf80	ENSG00000070761
C16orf87	ENSG00000155330
C16orf91	ENSG00000174109
C16orf93	ENSG00000196118
C17orf49	ENSG00000258315
C17orf51	ENSG00000212719
C17orf53	ENSG00000125319
C17orf58	ENSG00000186665
C17orf61-PLSCR3	ENSG00000262481
C17orf62	ENSG00000178927
C17orf67	ENSG00000214226
C17orf70	ENSG00000185504
C17orf75	ENSG00000108666
C17orf80	ENSG00000141219
C17orf85	ENSG00000074356
C17orf89	ENSG00000224877
C17orf96	ENSG00000179294
C17orf97	ENSG00000187624
C18orf21	ENSG00000141428
C18orf25	ENSG00000152242
C18orf8	ENSG00000141452
C19orf10	ENSG00000074842
C19orf12	ENSG00000131943
C19orf24	ENSG00000228300
C19orf25	ENSG00000119559
C19orf26	ENSG00000099625
C19orf38	ENSG00000214212
C19orf40	ENSG00000131944
C19orf43	ENSG00000123144
C19orf44	ENSG00000105072
C19orf47	ENSG00000160392
C19orf48	ENSG00000167747
C19orf52	ENSG00000142444
C19orf53	ENSG00000104979
C19orf54	ENSG00000188493
C19orf55	ENSG00000167595
C19orf60	ENSG00000006015
C19orf68	ENSG00000185453
C19orf70	ENSG00000174917
C19orf83	ENSG00000267757
C1D	ENSG00000197223
C1GALT1	ENSG00000106392
C1GALT1C1	ENSG00000171155
C1orf109	ENSG00000116922
C1orf112	ENSG00000000460
C1orf115	ENSG00000162817
C1orf122	ENSG00000197982
C1orf123	ENSG00000162384
C1orf131	ENSG00000143633
C1orf159	ENSG00000131591
C1orf162	ENSG00000143110
C1orf174	ENSG00000198912
C1orf198	ENSG00000119280
C1orf21	ENSG00000116667
C1orf213	ENSG00000249087
C1orf216	ENSG00000142686
C1orf233	ENSG00000228594
C1orf27	ENSG00000157181
C1orf35	ENSG00000143793
C1orf43	ENSG00000143612
C1orf50	ENSG00000164008
C1orf52	ENSG00000162642
C1orf53	ENSG00000203724
C1orf54	ENSG00000118292
C1orf63	ENSG00000117616
C1orf74	ENSG00000162757
C1orf85	ENSG00000198715
C1orf86	ENSG00000162585
C1QBP	ENSG00000108561
C1QL1	ENSG00000131094
C1S	ENSG00000182326
C20orf196	ENSG00000171984
C20orf24	ENSG00000101084
C20orf27	ENSG00000101220
C20orf96	ENSG00000196476
C21orf119	ENSG00000256073
C21orf2	ENSG00000160226
C21orf33	ENSG00000160221
C21orf59	ENSG00000159079
C21orf91	ENSG00000154642
C22orf39	ENSG00000242259
C2CD2L	ENSG00000172375
C2CD3	ENSG00000168014
C2CD5	ENSG00000111731
C2orf15	ENSG00000241962
C2orf42	ENSG00000115998
C2orf43	ENSG00000118961
C2orf44	ENSG00000163026
C2orf47	ENSG00000162972
C2orf49	ENSG00000135974
C2orf68	ENSG00000168887
C2orf69	ENSG00000178074
C2orf74	ENSG00000237651
C2orf76	ENSG00000186132
C3	ENSG00000125730
C3orf14	ENSG00000114405
C3orf17	ENSG00000163608
C3orf38	ENSG00000179021
C3orf52	ENSG00000114529
C3orf58	ENSG00000181744
C3orf62	ENSG00000188315
C4A	ENSG00000244731
C4B	ENSG00000224389
C4orf21	ENSG00000138658
C4orf27	ENSG00000056050
C4orf3	ENSG00000164096
C4orf32	ENSG00000174749
C4orf33	ENSG00000151470
C4orf46	ENSG00000205208
C5orf15	ENSG00000113583
C5orf22	ENSG00000082213
C5orf24	ENSG00000181904
C5orf30	ENSG00000181751
C5orf34	ENSG00000172244
C5orf42	ENSG00000197603
C5orf45	ENSG00000161010
C5orf51	ENSG00000205765
C5orf63	ENSG00000164241
C6orf106	ENSG00000196821
C6orf120	ENSG00000185127
C6orf136	ENSG00000204564
C6orf203	ENSG00000130349
C6orf211	ENSG00000146476
C6orf226	ENSG00000221821
C6orf47	ENSG00000204439
C6orf48	ENSG00000204387
C6orf52	ENSG00000137434
C6orf57	ENSG00000154079
C6orf62	ENSG00000112308
C6orf89	ENSG00000198663
C7orf26	ENSG00000146576
C7orf49	ENSG00000122783
C7orf50	ENSG00000146540
C7orf55	ENSG00000164898
C7orf55-LUC7L2	ENSG00000146963
C7orf60	ENSG00000164603
C7orf61	ENSG00000185955
C7orf73	ENSG00000243317
C8orf33	ENSG00000182307
C8orf44	ENSG00000213865
C8orf44-SGK3	ENSG00000270024
C8orf59	ENSG00000176731
C8orf76	ENSG00000189376
C8orf82	ENSG00000213563
C8orf88	ENSG00000253250
C9orf114	ENSG00000198917
C9orf116	ENSG00000160345
C9orf129	ENSG00000204352
C9orf142	ENSG00000148362
C9orf156	ENSG00000136932
C9orf16	ENSG00000171159
C9orf3	ENSG00000148120
C9orf37	ENSG00000203993
C9orf40	ENSG00000135045
C9orf41	ENSG00000156017
C9orf64	ENSG00000165118
C9orf69	ENSG00000238227
C9orf72	ENSG00000147894
C9orf78	ENSG00000136819
C9orf85	ENSG00000155621
C9orf89	ENSG00000165233
C9orf9	ENSG00000165698
C9orf91	ENSG00000157693
CA11	ENSG00000063180
CA12	ENSG00000074410
CA2	ENSG00000104267
CA5B	ENSG00000169239
CA5BP1	ENSG00000186312
CA8	ENSG00000178538
CAAP1	ENSG00000120159
CAB39	ENSG00000135932
CABIN1	ENSG00000099991
CABLES1	ENSG00000134508
CABLES2	ENSG00000149679
CABYR	ENSG00000154040
CACHD1	ENSG00000158966
CACNA1H	ENSG00000196557
CACNA2D2	ENSG00000007402
CACNB3	ENSG00000167535
CACTIN	ENSG00000105298
CACUL1	ENSG00000151893
CACYBP	ENSG00000116161
CACYBPP2	ENSG00000177855
CAD	ENSG00000084774
CADM1	ENSG00000182985
CADM4	ENSG00000105767
CALCB	ENSG00000175868
CALCOCO1	ENSG00000012822
CALCOCO2	ENSG00000136436
CALD1	ENSG00000122786
CALM1	ENSG00000198668
CALM2	ENSG00000143933
CALM3	ENSG00000160014
CALML4	ENSG00000129007
CALR	ENSG00000179218
CALU	ENSG00000128595
CAMK1	ENSG00000134072
CAMK2D	ENSG00000145349
CAMK2G	ENSG00000148660
CAMK2N1	ENSG00000162545
CAMKK1	ENSG00000004660
CAMKK2	ENSG00000110931
CAMKMT	ENSG00000143919
CAMLG	ENSG00000164615
CAMSAP1	ENSG00000130559
CAMSAP2	ENSG00000118200
CAMSAP3	ENSG00000076826
CAMTA1	ENSG00000171735
CAMTA2	ENSG00000108509
CAND1	ENSG00000111530
CAND2	ENSG00000144712
CANT1	ENSG00000171302
CANX	ENSG00000127022
CAP1	ENSG00000131236
CAP2	ENSG00000112186
CAPG	ENSG00000042493
CAPN1	ENSG00000014216
CAPN10	ENSG00000142330
CAPN15	ENSG00000103326
CAPN2	ENSG00000162909
CAPN7	ENSG00000131375
CAPNS1	ENSG00000126247
CAPRIN1	ENSG00000135387
CAPRIN2	ENSG00000110888
CAPZA1	ENSG00000116489
CAPZA2	ENSG00000198898
CAPZB	ENSG00000077549
CARD8	ENSG00000105483
CARHSP1	ENSG00000153048
CARKD	ENSG00000213995
CARM1	ENSG00000142453
CARS	ENSG00000110619
CARS2	ENSG00000134905
CASC3	ENSG00000108349
CASC4	ENSG00000166734
CASC5	ENSG00000137812
CASC7	ENSG00000259758
CASK	ENSG00000147044
CASKIN1	ENSG00000167971
CASKIN2	ENSG00000177303
CASP10	ENSG00000003400
CASP2	ENSG00000106144
CASP3	ENSG00000164305
CASP6	ENSG00000138794
CASP7	ENSG00000165806
CASP8	ENSG00000064012
CASP8AP2	ENSG00000118412
CASP9	ENSG00000132906
CASS4	ENSG00000087589
CAST	ENSG00000153113
CASZ1	ENSG00000130940
CAT	ENSG00000121691
CATSPER2	ENSG00000166762
CAV2	ENSG00000105971
CAV3	ENSG00000182533
CBFA2T2	ENSG00000078699
CBFB	ENSG00000067955
CBL	ENSG00000110395
CBLL1	ENSG00000105879
CBLN1	ENSG00000102924
CBR1	ENSG00000159228
CBR4	ENSG00000145439
CBS	ENSG00000160200
CBWD1	ENSG00000172785
CBWD2	ENSG00000136682
CBWD3	ENSG00000196873
CBWD5	ENSG00000147996
CBWD6	ENSG00000204790
CBWD7	ENSG00000215126
CBX1	ENSG00000108468
CBX2	ENSG00000173894
CBX3	ENSG00000122565
CBX4	ENSG00000141582
CBX5	ENSG00000094916
CBX6	ENSG00000183741
CBX8	ENSG00000141570
CBY1	ENSG00000100211
CC2D1A	ENSG00000132024
CC2D1B	ENSG00000154222
CCAR1	ENSG00000060339
CCAR2	ENSG00000158941
CCBL1	ENSG00000171097
CCBL2	ENSG00000137944
CCDC101	ENSG00000176476
CCDC102A	ENSG00000135736
CCDC104	ENSG00000163001
CCDC106	ENSG00000173581
CCDC107	ENSG00000159884
CCDC109B	ENSG00000005059
CCDC112	ENSG00000164221
CCDC113	ENSG00000103021
CCDC115	ENSG00000136710
CCDC117	ENSG00000159873
CCDC12	ENSG00000160799
CCDC121	ENSG00000176714
CCDC124	ENSG00000007080
CCDC125	ENSG00000183323
CCDC127	ENSG00000164366
CCDC130	ENSG00000104957
CCDC132	ENSG00000004766
CCDC134	ENSG00000100147
CCDC137	ENSG00000185298
CCDC138	ENSG00000163006
CCDC14	ENSG00000175455
CCDC142	ENSG00000135637
CCDC150	ENSG00000144395
CCDC157	ENSG00000187860
CCDC163P	ENSG00000236624
CCDC167	ENSG00000198937
CCDC174	ENSG00000154781
CCDC180	ENSG00000197816
CCDC181	ENSG00000117477
CCDC22	ENSG00000101997
CCDC23	ENSG00000177868
CCDC25	ENSG00000147419
CCDC28A	ENSG00000024862
CCDC28B	ENSG00000160050
CCDC3	ENSG00000151468
CCDC34	ENSG00000109881
CCDC41	ENSG00000173588
CCDC43	ENSG00000180329
CCDC47	ENSG00000108588
CCDC50	ENSG00000152492
CCDC51	ENSG00000164051
CCDC53	ENSG00000120860
CCDC57	ENSG00000176155
CCDC58	ENSG00000160124
CCDC59	ENSG00000133773
CCDC6	ENSG00000108091
CCDC64B	ENSG00000162069
CCDC66	ENSG00000180376
CCDC71	ENSG00000177352
CCDC71L	ENSG00000253276
CCDC74A	ENSG00000163040
CCDC74B	ENSG00000152076
CCDC77	ENSG00000120647
CCDC82	ENSG00000149231
CCDC84	ENSG00000186166
CCDC85B	ENSG00000175602
CCDC85C	ENSG00000205476
CCDC86	ENSG00000110104
CCDC88A	ENSG00000115355
CCDC88C	ENSG00000015133
CCDC9	ENSG00000105321
CCDC90B	ENSG00000137500
CCDC92	ENSG00000119242
CCDC93	ENSG00000125633
CCDC94	ENSG00000105248
CCDC97	ENSG00000142039
CCHCR1	ENSG00000204536
CCM2	ENSG00000136280
CCNA2	ENSG00000145386
CCNB1	ENSG00000134057
CCNB1IP1	ENSG00000100814
CCNB2	ENSG00000157456
CCNC	ENSG00000112237
CCND1	ENSG00000110092
CCND2	ENSG00000118971
CCND3	ENSG00000112576
CCNDBP1	ENSG00000166946
CCNE1	ENSG00000105173
CCNE2	ENSG00000175305
CCNF	ENSG00000162063
CCNG1	ENSG00000113328
CCNG2	ENSG00000138764
CCNH	ENSG00000134480
CCNI	ENSG00000118816
CCNJ	ENSG00000107443
CCNK	ENSG00000090061
CCNL1	ENSG00000163660
CCNL2	ENSG00000221978
CCNT1	ENSG00000129315
CCNT2	ENSG00000082258
CCNY	ENSG00000108100
CCNYL1	ENSG00000163249
CCP110	ENSG00000103540
CCRN4L	ENSG00000151014
CCS	ENSG00000173992
CCSAP	ENSG00000154429
CCSER2	ENSG00000107771
CCT2	ENSG00000166226
CCT3	ENSG00000163468
CCT4	ENSG00000115484
CCT5	ENSG00000150753
CCT6A	ENSG00000146731
CCT6P1	ENSG00000228409
CCT6P3	ENSG00000234585
CCT7	ENSG00000135624
CCT8	ENSG00000156261
CCZ1	ENSG00000122674
CCZ1B	ENSG00000146574
CD14	ENSG00000170458
CD151	ENSG00000177697
CD164	ENSG00000135535
CD276	ENSG00000103855
CD2AP	ENSG00000198087
CD2BP2	ENSG00000169217
CD320	ENSG00000167775
CD3EAP	ENSG00000117877
CD40	ENSG00000101017
CD46	ENSG00000117335
CD47	ENSG00000196776
CD55	ENSG00000196352
CD58	ENSG00000116815
CD59	ENSG00000085063
CD63	ENSG00000135404
CD70	ENSG00000125726
CD81	ENSG00000110651
CD83	ENSG00000112149
CD9	ENSG00000010278
CD97	ENSG00000123146
CD99	ENSG00000002586
CD99L2	ENSG00000102181
CDA	ENSG00000158825
CDADC1	ENSG00000102543
CDAN1	ENSG00000140326
CDC123	ENSG00000151465
CDC14A	ENSG00000079335
CDC14B	ENSG00000081377
CDC16	ENSG00000130177
CDC20	ENSG00000117399
CDC23	ENSG00000094880
CDC25A	ENSG00000164045
CDC25B	ENSG00000101224
CDC25C	ENSG00000158402
CDC26	ENSG00000176386
CDC27	ENSG00000004897
CDC34	ENSG00000099804
CDC37	ENSG00000105401
CDC37L1	ENSG00000106993
CDC40	ENSG00000168438
CDC42	ENSG00000070831
CDC42BPA	ENSG00000143776
CDC42BPB	ENSG00000198752
CDC42EP1	ENSG00000128283
CDC42EP2	ENSG00000149798
CDC42EP4	ENSG00000179604
CDC42P6	ENSG00000237350
CDC42SE1	ENSG00000197622
CDC42SE2	ENSG00000158985
CDC45	ENSG00000093009
CDC5L	ENSG00000096401
CDC6	ENSG00000094804
CDC7	ENSG00000097046
CDC73	ENSG00000134371
CDCA2	ENSG00000184661
CDCA3	ENSG00000111665
CDCA4	ENSG00000170779
CDCA5	ENSG00000146670
CDCA7	ENSG00000144354
CDCA7L	ENSG00000164649
CDCA8	ENSG00000134690
CDH2	ENSG00000170558
CDH23	ENSG00000107736
CDH24	ENSG00000139880
CDIP1	ENSG00000089486
CDIPT	ENSG00000103502
CDK1	ENSG00000170312
CDK10	ENSG00000185324
CDK11A	ENSG00000008128
CDK11B	ENSG00000248333
CDK12	ENSG00000167258
CDK13	ENSG00000065883
CDK14	ENSG00000058091
CDK16	ENSG00000102225
CDK17	ENSG00000059758
CDK18	ENSG00000117266
CDK19	ENSG00000155111
CDK2	ENSG00000123374
CDK20	ENSG00000156345
CDK2AP1	ENSG00000111328
CDK2AP2	ENSG00000167797
CDK4	ENSG00000135446
CDK5	ENSG00000164885
CDK5R1	ENSG00000176749
CDK5RAP1	ENSG00000101391
CDK5RAP2	ENSG00000136861
CDK5RAP3	ENSG00000108465
CDK6	ENSG00000105810
CDK7	ENSG00000134058
CDK8	ENSG00000132964
CDK9	ENSG00000136807
CDKAL1	ENSG00000145996
CDKL3	ENSG00000006837
CDKN1A	ENSG00000124762
CDKN1B	ENSG00000111276
CDKN2A	ENSG00000147889
CDKN2AIP	ENSG00000168564
CDKN2AIPNL	ENSG00000237190
CDKN2C	ENSG00000123080
CDKN2D	ENSG00000129355
CDKN3	ENSG00000100526
CDON	ENSG00000064309
CDR2	ENSG00000140743
CDR2L	ENSG00000109089
CDRT4	ENSG00000239704
CDS1	ENSG00000163624
CDS2	ENSG00000101290
CDT1	ENSG00000167513
CDV3	ENSG00000091527
CDX2	ENSG00000165556
CDYL	ENSG00000153046
CEBPA	ENSG00000245848
CEBPB	ENSG00000172216
CEBPG	ENSG00000153879
CEBPZ	ENSG00000115816
CEBPZ-AS1	ENSG00000218739
CECR2	ENSG00000099954
CECR5	ENSG00000069998
CEL	ENSG00000170835
CELF1	ENSG00000149187
CELF6	ENSG00000273025
CELP	ENSG00000170827
CELSR2	ENSG00000143126
CELSR3	ENSG00000008300
CENPA	ENSG00000115163
CENPB	ENSG00000125817
CENPBD1	ENSG00000177946
CENPBD1P1	ENSG00000213753
CENPC	ENSG00000145241
CENPE	ENSG00000138778
CENPF	ENSG00000117724
CENPH	ENSG00000153044
CENPI	ENSG00000102384
CENPJ	ENSG00000151849
CENPK	ENSG00000123219
CENPL	ENSG00000120334
CENPM	ENSG00000100162
CENPN	ENSG00000166451
CENPO	ENSG00000138092
CENPP	ENSG00000188312
CENPQ	ENSG00000031691
CENPT	ENSG00000102901
CENPU	ENSG00000151725
CENPV	ENSG00000166582
CENPW	ENSG00000203760
CEP104	ENSG00000116198
CEP120	ENSG00000168944
CEP135	ENSG00000174799
CEP152	ENSG00000103995
CEP164	ENSG00000110274
CEP170	ENSG00000143702
CEP170B	ENSG00000099814
CEP170P1	ENSG00000154608
CEP192	ENSG00000101639
CEP250	ENSG00000126001
CEP290	ENSG00000198707
CEP350	ENSG00000135837
CEP41	ENSG00000106477
CEP44	ENSG00000164118
CEP55	ENSG00000138180
CEP57	ENSG00000166037
CEP57L1	ENSG00000183137
CEP63	ENSG00000182923
CEP68	ENSG00000011523
CEP70	ENSG00000114107
CEP72	ENSG00000112877
CEP76	ENSG00000101624
CEP78	ENSG00000148019
CEP85	ENSG00000130695
CEP85L	ENSG00000111860
CEP89	ENSG00000121289
CEP95	ENSG00000258890
CEP97	ENSG00000182504
CEPT1	ENSG00000134255
CERCAM	ENSG00000167123
CERK	ENSG00000100422
CERS1	ENSG00000223802
CERS2	ENSG00000143418
CERS4	ENSG00000090661
CERS5	ENSG00000139624
CERS6	ENSG00000172292
CES2	ENSG00000172831
CETN2	ENSG00000147400
CETN3	ENSG00000153140
CFD	ENSG00000197766
CFDP1	ENSG00000153774
CFL1	ENSG00000172757
CFL2	ENSG00000165410
CGA	ENSG00000135346
CGGBP1	ENSG00000163320
CGRRF1	ENSG00000100532
CHAC2	ENSG00000143942
CHAF1A	ENSG00000167670
CHAF1B	ENSG00000159259
CHAMP1	ENSG00000198824
CHCHD1	ENSG00000172586
CHCHD10	ENSG00000250479
CHCHD2	ENSG00000106153
CHCHD2P6	ENSG00000235084
CHCHD3	ENSG00000106554
CHCHD4	ENSG00000163528
CHCHD5	ENSG00000125611
CHCHD6	ENSG00000159685
CHCHD7	ENSG00000170791
CHD1	ENSG00000153922
CHD1L	ENSG00000131778
CHD2	ENSG00000173575
CHD3	ENSG00000170004
CHD4	ENSG00000111642
CHD6	ENSG00000124177
CHD7	ENSG00000171316
CHD8	ENSG00000100888
CHD9	ENSG00000177200
CHEK1	ENSG00000149554
CHEK2	ENSG00000183765
CHERP	ENSG00000085872
CHFR	ENSG00000072609
CHIC1	ENSG00000204116
CHIC2	ENSG00000109220
CHID1	ENSG00000177830
CHKA	ENSG00000110721
CHKB	ENSG00000100288
CHKB-CPT1B	ENSG00000254413
CHM	ENSG00000188419
CHML	ENSG00000203668
CHMP1A	ENSG00000131165
CHMP1B	ENSG00000255112
CHMP2A	ENSG00000130724
CHMP2B	ENSG00000083937
CHMP3	ENSG00000115561
CHMP4A	ENSG00000254505
CHMP4B	ENSG00000101421
CHMP4C	ENSG00000164695
CHMP5	ENSG00000086065
CHMP6	ENSG00000176108
CHMP7	ENSG00000147457
CHN1	ENSG00000128656
CHORDC1	ENSG00000110172
CHP1	ENSG00000187446
CHPF	ENSG00000123989
CHPF2	ENSG00000033100
CHPT1	ENSG00000111666
CHRAC1	ENSG00000104472
CHRFAM7A	ENSG00000166664
CHRM3	ENSG00000133019
CHRNA5	ENSG00000169684
CHRNA7	ENSG00000175344
CHST10	ENSG00000115526
CHST11	ENSG00000171310
CHST12	ENSG00000136213
CHST3	ENSG00000122863
CHST7	ENSG00000147119
CHST8	ENSG00000124302
CHSY1	ENSG00000131873
CHTF18	ENSG00000127586
CHTF8	ENSG00000168802
CHTOP	ENSG00000160679
CHUK	ENSG00000213341
CHURC1	ENSG00000258289
CHURC1-FNTB	ENSG00000125954
CIAO1	ENSG00000144021
CIAPIN1	ENSG00000005194
CIB1	ENSG00000185043
CIB2	ENSG00000136425
CIC	ENSG00000079432
CIDECP	ENSG00000186162
CILP2	ENSG00000160161
CINP	ENSG00000100865
CIPC	ENSG00000198894
CIR1	ENSG00000138433
CIRBP	ENSG00000099622
CIRH1A	ENSG00000141076
CISD1	ENSG00000122873
CISD2	ENSG00000145354
CISD3	ENSG00000230055
CIT	ENSG00000122966
CITED1	ENSG00000125931
CITED2	ENSG00000164442
CIZ1	ENSG00000148337
CKAP2	ENSG00000136108
CKAP2L	ENSG00000169607
CKAP4	ENSG00000136026
CKAP5	ENSG00000175216
CKB	ENSG00000166165
CKLF	ENSG00000217555
CKLF-CMTM1	ENSG00000254788
CKMT1A	ENSG00000223572
CKMT1B	ENSG00000237289
CKS1B	ENSG00000173207
CKS2	ENSG00000123975
CLASP1	ENSG00000074054
CLASP2	ENSG00000163539
CLASRP	ENSG00000104859
CLCC1	ENSG00000121940
CLCN3	ENSG00000109572
CLCN6	ENSG00000011021
CLCN7	ENSG00000103249
CLDN12	ENSG00000157224
CLDND1	ENSG00000080822
CLEC11A	ENSG00000105472
CLEC16A	ENSG00000038532
CLGN	ENSG00000153132
CLIC1	ENSG00000213719
CLIC4	ENSG00000169504
CLINT1	ENSG00000113282
CLIP1	ENSG00000130779
CLIP2	ENSG00000106665
CLK1	ENSG00000013441
CLK2	ENSG00000176444
CLK3	ENSG00000179335
CLK4	ENSG00000113240
CLN3	ENSG00000261832
CLN5	ENSG00000102805
CLN6	ENSG00000128973
CLN8	ENSG00000182372
CLNS1A	ENSG00000074201
CLOCK	ENSG00000134852
CLP1	ENSG00000172409
CLPB	ENSG00000162129
CLPP	ENSG00000125656
CLPTM1	ENSG00000104853
CLPTM1L	ENSG00000049656
CLPX	ENSG00000166855
CLSPN	ENSG00000092853
CLSTN1	ENSG00000171603
CLSTN3	ENSG00000139182
CLTA	ENSG00000122705
CLTB	ENSG00000175416
CLTC	ENSG00000141367
CLTCL1	ENSG00000070371
CLU	ENSG00000120885
CLUAP1	ENSG00000103351
CLUH	ENSG00000132361
CLUHP3	ENSG00000131797
CLYBL	ENSG00000125246
CMAS	ENSG00000111726
CMBL	ENSG00000164237
CMC1	ENSG00000187118
CMC2	ENSG00000103121
CMC4	ENSG00000182712
CMIP	ENSG00000153815
CMPK1	ENSG00000162368
CMSS1	ENSG00000184220
CMTM3	ENSG00000140931
CMTM4	ENSG00000183723
CMTM6	ENSG00000091317
CMTM7	ENSG00000153551
CMTM8	ENSG00000170293
CMTR1	ENSG00000137200
CMTR2	ENSG00000180917
CNBP	ENSG00000169714
CNDP2	ENSG00000133313
CNEP1R1	ENSG00000205423
CNIH1	ENSG00000100528
CNIH4	ENSG00000143771
CNKSR3	ENSG00000153721
CNN2	ENSG00000064666
CNN3	ENSG00000117519
CNNM2	ENSG00000148842
CNNM3	ENSG00000168763
CNNM4	ENSG00000158158
CNOT1	ENSG00000125107
CNOT10	ENSG00000182973
CNOT11	ENSG00000158435
CNOT2	ENSG00000111596
CNOT3	ENSG00000088038
CNOT4	ENSG00000080802
CNOT6	ENSG00000113300
CNOT6L	ENSG00000138767
CNOT7	ENSG00000198791
CNOT8	ENSG00000155508
CNP	ENSG00000173786
CNPPD1	ENSG00000115649
CNPY3	ENSG00000137161
CNST	ENSG00000162852
CNTFR	ENSG00000122756
CNTRL	ENSG00000119397
CNTROB	ENSG00000170037
COA1	ENSG00000106603
COA3	ENSG00000183978
COA4	ENSG00000181924
COA5	ENSG00000183513
COA6	ENSG00000168275
COA7	ENSG00000162377
COASY	ENSG00000068120
COCH	ENSG00000100473
COG1	ENSG00000166685
COG2	ENSG00000135775
COG3	ENSG00000136152
COG4	ENSG00000103051
COG5	ENSG00000164597
COG6	ENSG00000133103
COG7	ENSG00000168434
COG8	ENSG00000213380
COIL	ENSG00000121058
COL18A1	ENSG00000182871
COL4A1	ENSG00000187498
COL4A2	ENSG00000134871
COL4A3BP	ENSG00000113163
COL4A5	ENSG00000188153
COL6A1	ENSG00000142156
COL6A2	ENSG00000142173
COLEC12	ENSG00000158270
COLGALT1	ENSG00000130309
COMMD1	ENSG00000173163
COMMD10	ENSG00000145781
COMMD2	ENSG00000114744
COMMD3	ENSG00000148444
COMMD3-BMI1	ENSG00000269897
COMMD4	ENSG00000140365
COMMD5	ENSG00000170619
COMMD6	ENSG00000188243
COMMD7	ENSG00000149600
COMMD8	ENSG00000169019
COMMD9	ENSG00000110442
COMT	ENSG00000093010
COMTD1	ENSG00000165644
COPA	ENSG00000122218
COPB1	ENSG00000129083
COPB2	ENSG00000184432
COPE	ENSG00000105669
COPG1	ENSG00000181789
COPG2	ENSG00000158623
COPRS	ENSG00000172301
COPS2	ENSG00000166200
COPS3	ENSG00000141030
COPS4	ENSG00000138663
COPS5	ENSG00000121022
COPS6	ENSG00000168090
COPS7A	ENSG00000111652
COPS7B	ENSG00000144524
COPS8	ENSG00000198612
COPZ1	ENSG00000111481
COQ10A	ENSG00000135469
COQ10B	ENSG00000115520
COQ2	ENSG00000173085
COQ3	ENSG00000132423
COQ4	ENSG00000167113
COQ5	ENSG00000110871
COQ6	ENSG00000119723
COQ7	ENSG00000167186
COQ9	ENSG00000088682
CORO1B	ENSG00000172725
CORO1C	ENSG00000110880
CORO2A	ENSG00000106789
CORO7	ENSG00000262246
CORO7-PAM16	ENSG00000103426
COTL1	ENSG00000103187
COX10	ENSG00000006695
COX11	ENSG00000166260
COX14	ENSG00000178449
COX15	ENSG00000014919
COX16	ENSG00000133983
COX17	ENSG00000138495
COX18	ENSG00000163626
COX19	ENSG00000240230
COX20	ENSG00000203667
COX4I1	ENSG00000131143
COX5A	ENSG00000178741
COX5B	ENSG00000135940
COX6A1	ENSG00000111775
COX6A1P2	ENSG00000226976
COX6B1	ENSG00000126267
COX6C	ENSG00000164919
COX7A2	ENSG00000112695
COX7A2L	ENSG00000115944
COX7B	ENSG00000131174
COX7C	ENSG00000127184
CPD	ENSG00000108582
CPE	ENSG00000109472
CPEB1	ENSG00000214575
CPEB4	ENSG00000113742
CPLX1	ENSG00000168993
CPNE1	ENSG00000214078
CPNE2	ENSG00000140848
CPNE3	ENSG00000085719
CPNE7	ENSG00000178773
CPOX	ENSG00000080819
CPPED1	ENSG00000103381
CPSF1	ENSG00000071894
CPSF2	ENSG00000165934
CPSF3	ENSG00000119203
CPSF3L	ENSG00000127054
CPSF4	ENSG00000160917
CPSF6	ENSG00000111605
CPSF7	ENSG00000149532
CPT1A	ENSG00000110090
CPT1B	ENSG00000205560
CPT1C	ENSG00000169169
CPT2	ENSG00000157184
CPVL	ENSG00000106066
CRABP2	ENSG00000143320
CRADD	ENSG00000169372
CRAMP1L	ENSG00000007545
CRAT	ENSG00000095321
CRBN	ENSG00000113851
CRCP	ENSG00000241258
CREB1	ENSG00000118260
CREB3	ENSG00000107175
CREB3L2	ENSG00000182158
CREB3L4	ENSG00000143578
CREB5	ENSG00000146592
CREBBP	ENSG00000005339
CREBL2	ENSG00000111269
CREBRF	ENSG00000164463
CREBZF	ENSG00000137504
CREG1	ENSG00000143162
CRELD1	ENSG00000163703
CRELD2	ENSG00000184164
[truncated: 8,837 more rows]

## Sheet: Overlapped genes with Yang
Supplementary file 3b. Overlapped genes with Yang et al.
Gene Symbol	Ensembl ID
AAAS	ENSG00000094914
AAR2	ENSG00000131043
AARS	ENSG00000090861
AATF	ENSG00000108270
ABHD14A	ENSG00000248487
ABHD14B	ENSG00000114779
ABHD17A	ENSG00000129968
ABHD3	ENSG00000158201
AC002075.4	ENSG00000237729
AC004453.8	ENSG00000146677
AC005884.1	ENSG00000227694
AC007318.5	ENSG00000172974
AC007969.5	ENSG00000233762
AC009245.3	ENSG00000230383
AC016734.2	ENSG00000228305
AC016739.2	ENSG00000218175
AC084018.1	ENSG00000212694
ACACB	ENSG00000076555
ACAD10	ENSG00000111271
ACAP3	ENSG00000131584
ACLY	ENSG00000131473
ACOT1	ENSG00000184227
ACOT2	ENSG00000119673
ACOT8	ENSG00000101473
ACTB	ENSG00000075624
ACTG1	ENSG00000184009
ACTN4	ENSG00000130402
ACTR10	ENSG00000131966
ACTR2	ENSG00000138071
ACVR2A	ENSG00000121989
ADAM15	ENSG00000143537
ADAR	ENSG00000160710
ADCK4	ENSG00000123815
ADCY9	ENSG00000162104
ADNP	ENSG00000101126
ADRM1	ENSG00000130706
AES	ENSG00000104964
AGAP1	ENSG00000157985
AGAP3	ENSG00000133612
AGPS	ENSG00000018510
AGRN	ENSG00000188157
AHDC1	ENSG00000126705
AHNAK	ENSG00000124942
AHRR	ENSG00000063438
AHSA2	ENSG00000173209
AIG1	ENSG00000146416
AIP	ENSG00000110711
AJUBA	ENSG00000129474
AKAP12	ENSG00000131016
AKAP8	ENSG00000105127
AKIRIN1	ENSG00000174574
AKNA	ENSG00000106948
AKR7A2	ENSG00000053371
AKT2	ENSG00000105221
ALDH16A1	ENSG00000161618
ALDH18A1	ENSG00000059573
ALDH5A1	ENSG00000112294
ALDOA	ENSG00000149925
ALG1	ENSG00000033011
ALG3	ENSG00000214160
ALYREF	ENSG00000183684
AMBRA1	ENSG00000110497
AMFR	ENSG00000159461
AMH	ENSG00000104899
ANAPC5	ENSG00000089053
ANKH	ENSG00000154122
ANKHD1	ENSG00000131503
ANKRD10	ENSG00000088448
ANKRD11	ENSG00000167522
ANKRD17	ENSG00000132466
ANKRD9	ENSG00000156381
ANO6	ENSG00000177119
ANXA2	ENSG00000182718
ANXA5	ENSG00000164111
AP2A2	ENSG00000183020
AP2M1	ENSG00000161203
AP2S1	ENSG00000042753
AP3D1	ENSG00000065000
AP5B1	ENSG00000254470
AP5Z1	ENSG00000242802
APAF1	ENSG00000120868
APEH	ENSG00000164062
APLP1	ENSG00000105290
APLP2	ENSG00000084234
APRT	ENSG00000198931
ARAF	ENSG00000078061
ARAP1	ENSG00000186635
ARF1	ENSG00000143761
ARHGAP11A	ENSG00000198826
ARHGAP33	ENSG00000004777
ARHGDIA	ENSG00000141522
ARHGEF11	ENSG00000132694
ARHGEF12	ENSG00000196914
ARID1A	ENSG00000117713
ARID1B	ENSG00000049618
ARL4D	ENSG00000175906
ARPC1A	ENSG00000241685
ARPC1B	ENSG00000130429
ARPC5L	ENSG00000136950
ARRB2	ENSG00000141480
ASAP2	ENSG00000151693
ASB6	ENSG00000148331
ASNA1	ENSG00000198356
ASS1	ENSG00000130707
ATAD2	ENSG00000156802
ATAT1	ENSG00000137343
ATF4	ENSG00000128272
ATG13	ENSG00000175224
ATG14	ENSG00000126775
ATG2A	ENSG00000110046
ATG4D	ENSG00000130734
ATMIN	ENSG00000166454
ATN1	ENSG00000111676
ATP13A2	ENSG00000159363
ATP1B3	ENSG00000069849
ATP5B	ENSG00000110955
ATP5D	ENSG00000099624
ATP5E	ENSG00000124172
ATP5J2-PTCD1	ENSG00000248919
ATP5SL	ENSG00000105341
ATP6AP2	ENSG00000182220
ATP6V0B	ENSG00000117410
ATP6V0C	ENSG00000185883
ATP6V0E1	ENSG00000113732
ATP6V1G2-DDX39B	ENSG00000254870
ATXN2L	ENSG00000168488
AUP1	ENSG00000115307
AVPI1	ENSG00000119986
B3GALNT2	ENSG00000162885
B4GALT3	ENSG00000158850
BAG6	ENSG00000204463
BAI1	ENSG00000181790
BAP1	ENSG00000163930
BAX	ENSG00000087088
BBS4	ENSG00000140463
BCAP31	ENSG00000185825
BCAR1	ENSG00000050820
BCL7C	ENSG00000099385
BCOR	ENSG00000183337
BFAR	ENSG00000103429
BMP1	ENSG00000168487
BMP2	ENSG00000125845
BMP8B	ENSG00000116985
BMS1	ENSG00000165733
BNIP3	ENSG00000176171
BRAT1	ENSG00000106009
BRCA1	ENSG00000012048
BRD2	ENSG00000204256
BRD4	ENSG00000141867
BRI3BP	ENSG00000184992
BRSK2	ENSG00000174672
BTBD2	ENSG00000133243
BUB3	ENSG00000154473
C10orf76	ENSG00000120029
C11orf73	ENSG00000149196
C11orf84	ENSG00000168005
C11orf95	ENSG00000188070
C12orf10	ENSG00000139637
C12orf65	ENSG00000130921
C15orf38-AP3S2	ENSG00000250021
C17orf89	ENSG00000224877
C17orf96	ENSG00000179294
C19orf26	ENSG00000099625
C19orf48	ENSG00000167747
C19orf70	ENSG00000174917
C1QL1	ENSG00000131094
C1orf122	ENSG00000197982
C1orf85	ENSG00000198715
C4A	ENSG00000244731
C6orf136	ENSG00000204564
C6orf62	ENSG00000112308
C7orf55-LUC7L2	ENSG00000146963
C9orf142	ENSG00000148362
C9orf78	ENSG00000136819
CABIN1	ENSG00000099991
CABLES1	ENSG00000134508
CALR	ENSG00000179218
CALU	ENSG00000128595
CAMK2N1	ENSG00000162545
CAMKK2	ENSG00000110931
CAMSAP1	ENSG00000130559
CAMTA1	ENSG00000171735
CAPN7	ENSG00000131375
CAPZB	ENSG00000077549
CARM1	ENSG00000142453
CASKIN2	ENSG00000177303
CBWD1	ENSG00000172785
CC2D1B	ENSG00000154222
CCDC130	ENSG00000104957
CCDC51	ENSG00000164051
CCND1	ENSG00000110092
CCNL2	ENSG00000221978
CCNY	ENSG00000108100
CCT3	ENSG00000163468
CCT5	ENSG00000150753
CCT6A	ENSG00000146731
CD151	ENSG00000177697
CD55	ENSG00000196352
CD9	ENSG00000010278
CDC42EP1	ENSG00000128283
CDC42EP2	ENSG00000149798
CDC42EP4	ENSG00000179604
CDH2	ENSG00000170558
CDH23	ENSG00000107736
CDIP1	ENSG00000089486
CDIPT	ENSG00000103502
CDK1	ENSG00000170312
CDK12	ENSG00000167258
CDK13	ENSG00000065883
CDK5RAP3	ENSG00000108465
CDKN2A	ENSG00000147889
CDT1	ENSG00000167513
CDV3	ENSG00000091527
CEBPB	ENSG00000172216
CECR5	ENSG00000069998
CELSR3	ENSG00000008300
CENPB	ENSG00000125817
CENPV	ENSG00000166582
CEP104	ENSG00000116198
CEP170B	ENSG00000099814
CEP350	ENSG00000135837
CERCAM	ENSG00000167123
CERK	ENSG00000100422
CFD	ENSG00000197766
CFL1	ENSG00000172757
CHCHD10	ENSG00000250479
CHCHD3	ENSG00000106554
CHD3	ENSG00000170004
CHP1	ENSG00000187446
CHPF	ENSG00000123989
CHST3	ENSG00000122863
CHTOP	ENSG00000160679
CIC	ENSG00000079432
CINP	ENSG00000100865
CITED2	ENSG00000164442
CKAP5	ENSG00000175216
CKB	ENSG00000166165
CKS1B	ENSG00000173207
CLCN7	ENSG00000103249
CLIC1	ENSG00000213719
CLK2	ENSG00000176444
CLPP	ENSG00000125656
CLPTM1	ENSG00000104853
CLTA	ENSG00000122705
CLTC	ENSG00000141367
CLU	ENSG00000120885
CLUH	ENSG00000132361
CNBP	ENSG00000169714
CNN2	ENSG00000064666
CNNM3	ENSG00000168763
CNOT1	ENSG00000125107
CNOT3	ENSG00000088038
CNTROB	ENSG00000170037
COA4	ENSG00000181924
COG8	ENSG00000213380
COL18A1	ENSG00000182871
COL4A1	ENSG00000187498
COL4A2	ENSG00000134871
COL4A5	ENSG00000188153
COLGALT1	ENSG00000130309
COMMD4	ENSG00000140365
COPS5	ENSG00000121022
COPS6	ENSG00000168090
COPS7A	ENSG00000111652
COQ10A	ENSG00000135469
COQ6	ENSG00000119723
COTL1	ENSG00000103187
COX4I1	ENSG00000131143
COX5B	ENSG00000135940
COX6A1P2	ENSG00000226976
COX6B1	ENSG00000126267
CPE	ENSG00000109472
CPSF1	ENSG00000071894
CPSF4	ENSG00000160917
CPT1A	ENSG00000110090
CRAMP1L	ENSG00000007545
CREB3L2	ENSG00000182158
CREBBP	ENSG00000005339
CREG1	ENSG00000143162
CRKL	ENSG00000099942
CRTAP	ENSG00000170275
CRTC3	ENSG00000140577
CRY1	ENSG00000008405
CS	ENSG00000062485
CSNK1D	ENSG00000141551
CSNK1E	ENSG00000213923
CSNK1G2	ENSG00000133275
CTBP1	ENSG00000159692
CTC-459F4.3	ENSG00000267575
CTC-575D19.1	ENSG00000233913
CTD-2192J16.15	ENSG00000178464
CTD-2270N23.1	ENSG00000213862
CTD-2545G14.7	ENSG00000262526
CTD-3035D6.1	ENSG00000213315
CTD-3232M19.2	ENSG00000204771
CTDSP2	ENSG00000175215
CTNNB1	ENSG00000168036
CTNNBL1	ENSG00000132792
CTSB	ENSG00000164733
CTSD	ENSG00000117984
CTU2	ENSG00000174177
CUEDC1	ENSG00000180891
CUL9	ENSG00000112659
CUX1	ENSG00000257923
CXorf56	ENSG00000018610
CYB561	ENSG00000008283
CYHR1	ENSG00000187954
CYLD	ENSG00000083799
CYR61	ENSG00000142871
CYTH1	ENSG00000108669
DAGLA	ENSG00000134780
DAK	ENSG00000149476
DBF4B	ENSG00000161692
DBI	ENSG00000155368
DBNL	ENSG00000136279
DCAF10	ENSG00000122741
DCAF12	ENSG00000198876
DCBLD1	ENSG00000164465
DCTN1	ENSG00000204843
DCXR	ENSG00000169738
DDA1	ENSG00000130311
DDB1	ENSG00000167986
DDOST	ENSG00000244038
DDR1	ENSG00000204580
DDX1	ENSG00000079785
DDX17	ENSG00000100201
DDX19A	ENSG00000168872
DDX20	ENSG00000064703
DDX39A	ENSG00000123136
DDX3X	ENSG00000215301
DDX46	ENSG00000145833
DDX52	ENSG00000141141
DDX56	ENSG00000136271
DDX59	ENSG00000118197
DEAF1	ENSG00000177030
DENND4B	ENSG00000198837
DESI1	ENSG00000100418
DGKD	ENSG00000077044
DGKZ	ENSG00000149091
DHCR24	ENSG00000116133
DHFR	ENSG00000228716
DHRS3	ENSG00000162496
DHTKD1	ENSG00000181192
DHX16	ENSG00000204560
DHX30	ENSG00000132153
DHX33	ENSG00000005100
DHX8	ENSG00000067596
DLAT	ENSG00000150768
DLD	ENSG00000091140
DLST	ENSG00000119689
DMD	ENSG00000198947
DNA2	ENSG00000138346
DNAH14	ENSG00000185842
DNAJC10	ENSG00000077232
DNAJC14	ENSG00000135392
DNAJC21	ENSG00000168724
DNAJC30	ENSG00000176410
DNAJC7	ENSG00000168259
DNM2	ENSG00000079805
DNMT3B	ENSG00000088305
DOHH	ENSG00000129932
DOLK	ENSG00000175283
DPP9	ENSG00000142002
DTX2	ENSG00000091073
DUSP5	ENSG00000138166
DUSP9	ENSG00000130829
DVL1	ENSG00000107404
DYM	ENSG00000141627
DYNC1H1	ENSG00000197102
E2F3	ENSG00000112242
E2F4	ENSG00000205250
E2F5	ENSG00000133740
E2F8	ENSG00000129173
ECE1	ENSG00000117298
ECH1	ENSG00000104823
ECHS1	ENSG00000127884
ECI1	ENSG00000167969
ECI2	ENSG00000198721
EED	ENSG00000074266
EEF1A1P11	ENSG00000228502
EEF1A1P13	ENSG00000250182
EEF1A1P19	ENSG00000249855
EEF1A1P6	ENSG00000233476
EEF1A2	ENSG00000101210
EEF1B2	ENSG00000114942
EEF1D	ENSG00000104529
EEF1G	ENSG00000254772
EFNB1	ENSG00000090776
EFR3A	ENSG00000132294
EGLN1	ENSG00000135766
EHBP1L1	ENSG00000173442
EHD4	ENSG00000103966
EHMT1	ENSG00000181090
EI24	ENSG00000149547
EIF1	ENSG00000173812
EIF2AK1	ENSG00000086232
EIF2AK4	ENSG00000128829
EIF2B5	ENSG00000145191
EIF2S2	ENSG00000125977
EIF2S3	ENSG00000130741
EIF3B	ENSG00000106263
EIF3C	ENSG00000184110
EIF3CL	ENSG00000205609
EIF3FP3	ENSG00000233426
EIF3L	ENSG00000100129
EIF3M	ENSG00000149100
EIF4A1	ENSG00000161960
EIF4A1P10	ENSG00000229132
EIF4BP7	ENSG00000225031
EIF4G2	ENSG00000110321
EIF5A	ENSG00000132507
ELAC2	ENSG00000006744
ELK1	ENSG00000126767
ELOVL1	ENSG00000066322
EMC1	ENSG00000127463
EML3	ENSG00000149499
ENO1	ENSG00000074800
ENTPD4	ENSG00000197217
EP400	ENSG00000183495
EPAS1	ENSG00000116016
EPB41L4A-AS1	ENSG00000224032
EPB41L4B	ENSG00000095203
EPHB4	ENSG00000196411
EPN2	ENSG00000072134
EPPK1	ENSG00000227184
EPRS	ENSG00000136628
EPT1	ENSG00000138018
ERCC2	ENSG00000104884
ERGIC1	ENSG00000113719
ERGIC3	ENSG00000125991
ERH	ENSG00000100632
ESPL1	ENSG00000135476
ESYT2	ENSG00000117868
ETF1	ENSG00000120705
ETHE1	ENSG00000105755
ETS2	ENSG00000157557
EWSR1	ENSG00000182944
EXO1	ENSG00000174371
EXOC3	ENSG00000180104
EXOC6	ENSG00000138190
EXOC7	ENSG00000182473
EXTL3	ENSG00000012232
EYA3	ENSG00000158161
EYA4	ENSG00000112319
EZR	ENSG00000092820
F11R	ENSG00000158769
FADS1	ENSG00000149485
FADS2	ENSG00000134824
FADS3	ENSG00000221968
FAF1	ENSG00000185104
FAF2	ENSG00000113194
FAHD1	ENSG00000180185
FAM107B	ENSG00000065809
FAM120AOS	ENSG00000188938
FAM122B	ENSG00000156504
FAM129B	ENSG00000136830
FAM132B	ENSG00000178752
FAM136A	ENSG00000035141
FAM162A	ENSG00000114023
FAM168B	ENSG00000152102
FAM20B	ENSG00000116199
FAM217B	ENSG00000196227
FAM3A	ENSG00000071889
FAM45A	ENSG00000119979
FAM60A	ENSG00000139146
FAM65A	ENSG00000039523
FANCD2	ENSG00000144554
FANCI	ENSG00000140525
FARP1	ENSG00000152767
FARP2	ENSG00000006607
FASN	ENSG00000169710
FASTK	ENSG00000164896
FAU	ENSG00000149806
FBLN1	ENSG00000077942
FBN2	ENSG00000138829
FBXL14	ENSG00000171823
FBXL18	ENSG00000155034
FBXL6	ENSG00000182325
FBXO22	ENSG00000167196
FBXW5	ENSG00000159069
FBXW9	ENSG00000132004
FERMT2	ENSG00000073712
FGD1	ENSG00000102302
FGFR4	ENSG00000160867
FGFRL1	ENSG00000127418
FIBP	ENSG00000172500
FIG4	ENSG00000112367
FKBP10	ENSG00000141756
FLAD1	ENSG00000160688
FLCN	ENSG00000154803
FLII	ENSG00000177731
FLJ00104	ENSG00000205047
FLNA	ENSG00000196924
FLNB	ENSG00000136068
FLOT1	ENSG00000137312
FOCAD	ENSG00000188352
FOXK1	ENSG00000164916
FOXO1	ENSG00000150907
FOXRED2	ENSG00000100350
FSTL3	ENSG00000070404
FTH1P10	ENSG00000223361
FTL	ENSG00000087086
FUOM	ENSG00000148803
FURIN	ENSG00000140564
G6PD	ENSG00000160211
GAA	ENSG00000171298
GABARAPL1	ENSG00000139112
GALE	ENSG00000117308
GALM	ENSG00000143891
GALNS	ENSG00000141012
GANAB	ENSG00000089597
GAPDH	ENSG00000111640
GAPDHP1	ENSG00000228232
GARS	ENSG00000106105
GATA4	ENSG00000136574
GATA6	ENSG00000141448
GBAP1	ENSG00000160766
GBF1	ENSG00000107862
GCDH	ENSG00000105607
GCN1L1	ENSG00000089154
GDF1	ENSG00000130283
GEMIN5	ENSG00000082516
GGT7	ENSG00000131067
GHITM	ENSG00000165678
GID8	ENSG00000101193
GIGYF1	ENSG00000146830
GIPC1	ENSG00000123159
GJC1	ENSG00000182963
GLB1	ENSG00000170266
GLCCI1	ENSG00000106415
GMPS	ENSG00000163655
GNAI1	ENSG00000127955
GNAS	ENSG00000087460
GNB2L1	ENSG00000204628
GNB5	ENSG00000069966
GNE	ENSG00000159921
GNPAT	ENSG00000116906
GOLPH3	ENSG00000113384
GORASP1	ENSG00000114745
GORASP2	ENSG00000115806
GOT2	ENSG00000125166
GPAA1	ENSG00000197858
GPATCH1	ENSG00000076650
GPC1	ENSG00000063660
GPCPD1	ENSG00000125772
GPI	ENSG00000105220
GPR108	ENSG00000125734
GPR137	ENSG00000173264
GPX1	ENSG00000233276
GPX4	ENSG00000167468
GRB2	ENSG00000177885
GRIN2D	ENSG00000105464
GRK6	ENSG00000198055
GRN	ENSG00000030582
GSK3A	ENSG00000105723
GSTCD	ENSG00000138780
GSTM3	ENSG00000134202
GSTZ1	ENSG00000100577
GTF2I	ENSG00000077809
GTF2IRD1	ENSG00000006704
GTPBP1	ENSG00000100226
GTPBP6	ENSG00000178605
GTSE1	ENSG00000075218
GUSB	ENSG00000169919
GYPC	ENSG00000136732
H1F0	ENSG00000189060
H2AFY	ENSG00000113648
H3F3AP4	ENSG00000235655
H3F3B	ENSG00000132475
HACE1	ENSG00000085382
HADHB	ENSG00000138029
HARS	ENSG00000170445
HCFC1	ENSG00000172534
HCN2	ENSG00000099822
HDAC2	ENSG00000196591
HDDC3	ENSG00000184508
HDGF	ENSG00000143321
HDLBP	ENSG00000115677
HEATR6	ENSG00000068097
HECTD1	ENSG00000092148
HECTD4	ENSG00000173064
HEXB	ENSG00000049860
HINT1	ENSG00000169567
HINT2	ENSG00000137133
HIST1H1C	ENSG00000187837
HIST1H2BO	ENSG00000196331
HIST2H2AA4	ENSG00000203812
HK2	ENSG00000159399
HMG20B	ENSG00000064961
HMGA1	ENSG00000137309
HMGN2	ENSG00000198830
HN1L	ENSG00000206053
HNRNPA0	ENSG00000177733
HNRNPA1	ENSG00000135486
HNRNPA1L2	ENSG00000139675
HNRNPC	ENSG00000092199
HNRNPD	ENSG00000138668
HNRNPF	ENSG00000169813
HNRNPH1	ENSG00000169045
HNRNPK	ENSG00000165119
HNRNPM	ENSG00000099783
HNRNPUL1	ENSG00000105323
HOTAIRM1	ENSG00000233429
HOXC9	ENSG00000180806
HPRT1	ENSG00000165704
HSD17B14	ENSG00000087076
HSF1	ENSG00000185122
HSP90AB1	ENSG00000096384
HSP90B1	ENSG00000166598
HSPA5	ENSG00000044574
HSPB1	ENSG00000106211
HUWE1	ENSG00000086758
HYI	ENSG00000178922
HYOU1	ENSG00000149428
IARS	ENSG00000196305
IARS2	ENSG00000067704
ICK	ENSG00000112144
ID1	ENSG00000125968
IDH1	ENSG00000138413
IDS	ENSG00000010404
IER5L	ENSG00000188483
IFITM1	ENSG00000185885
IFRD2	ENSG00000214706
IGF1R	ENSG00000140443
IGF2R	ENSG00000197081
IL6ST	ENSG00000134352
IMPDH1	ENSG00000106348
IMPDH2	ENSG00000178035
INADL	ENSG00000132849
INF2	ENSG00000203485
INO80	ENSG00000128908
INO80E	ENSG00000169592
INPP4A	ENSG00000040933
INPPL1	ENSG00000165458
INSIG1	ENSG00000186480
INTS1	ENSG00000164880
INTS3	ENSG00000143624
IP6K1	ENSG00000176095
IPO5	ENSG00000065150
IQGAP3	ENSG00000183856
IQSEC1	ENSG00000144711
IRAK1	ENSG00000184216
IRF2BP2	ENSG00000168264
IRF2BPL	ENSG00000119669
ISCA1	ENSG00000135070
ISG15	ENSG00000187608
ITGB1	ENSG00000150093
ITGB1BP1	ENSG00000119185
ITM2B	ENSG00000136156
ITPR3	ENSG00000096433
JAG2	ENSG00000184916
JARID2	ENSG00000008083
JOSD1	ENSG00000100221
JTB	ENSG00000143543
JUNB	ENSG00000171223
JUND	ENSG00000130522
KANK2	ENSG00000197256
KAT8	ENSG00000103510
KATNB1	ENSG00000140854
KBTBD2	ENSG00000170852
KCTD1	ENSG00000134504
KCTD15	ENSG00000153885
KCTD2	ENSG00000180901
KCTD3	ENSG00000136636
KDELR1	ENSG00000105438
KDM2A	ENSG00000173120
KHSRP	ENSG00000088247
KIAA0319L	ENSG00000142687
KIAA1191	ENSG00000122203
KIAA1522	ENSG00000162522
KIAA1598	ENSG00000187164
KIF1B	ENSG00000054523
KIF26A	ENSG00000066735
KIF2C	ENSG00000142945
KIF5B	ENSG00000170759
KLC2	ENSG00000174996
KLC3	ENSG00000104892
KLF5	ENSG00000102554
KLHDC2	ENSG00000165516
KLHL12	ENSG00000117153
KLHL25	ENSG00000183655
KLHL29	ENSG00000119771
KPNB1	ENSG00000108424
KRT18	ENSG00000111057
KRT8	ENSG00000170421
KTN1	ENSG00000126777
KXD1	ENSG00000105700
LAMA5	ENSG00000130702
LAMB1	ENSG00000091136
LAMC1	ENSG00000135862
LAMTOR1	ENSG00000149357
LARP1	ENSG00000155506
LARP4B	ENSG00000107929
LARS2	ENSG00000011376
LASP1	ENSG00000002834
LDHB	ENSG00000111716
LEMD2	ENSG00000161904
LEPRE1	ENSG00000117385
LETM1	ENSG00000168924
LGALS3BP	ENSG00000108679
LGR4	ENSG00000205213
LHPP	ENSG00000107902
LIFR	ENSG00000113594
LIMK2	ENSG00000182541
LINC00657	ENSG00000260032
LLGL1	ENSG00000131899
LLGL2	ENSG00000073350
LMAN1	ENSG00000074695
LMAN2	ENSG00000169223
LMNA	ENSG00000160789
LMO4	ENSG00000143013
LONP1	ENSG00000196365
LONP2	ENSG00000102910
LOXL2	ENSG00000134013
LRFN4	ENSG00000173621
LRP1	ENSG00000123384
LRP11	ENSG00000120256
LRP4	ENSG00000134569
LRP5	ENSG00000162337
LRP8	ENSG00000157193
LRPPRC	ENSG00000138095
LRRC42	ENSG00000116212
LRRC58	ENSG00000163428
LRSAM1	ENSG00000148356
LSM14A	ENSG00000257103
LSM4	ENSG00000130520
LTBP3	ENSG00000168056
LTBP4	ENSG00000090006
LY6E	ENSG00000160932
LY6G5B	ENSG00000240053
LZTS2	ENSG00000107816
M6PR	ENSG00000003056
MACF1	ENSG00000127603
MAD2L1	ENSG00000164109
MAEA	ENSG00000090316
MAF1	ENSG00000179632
MAGI3	ENSG00000081026
MAN1B1	ENSG00000177239
MAN2B1	ENSG00000104774
MAN2C1	ENSG00000140400
MANBAL	ENSG00000101363
MAP2K1	ENSG00000169032
MAP2K5	ENSG00000137764
MAPK3	ENSG00000102882
MAPK8IP1	ENSG00000121653
MAPK8IP3	ENSG00000138834
MAPKAP1	ENSG00000119487
MARK4	ENSG00000007047
MAT2A	ENSG00000168906
MAU2	ENSG00000129933
MAVS	ENSG00000088888
MAZ	ENSG00000103495
MBD2	ENSG00000134046
MBTPS2	ENSG00000012174
MCAM	ENSG00000076706
MCFD2	ENSG00000180398
MCM2	ENSG00000073111
MCM3AP	ENSG00000160294
MCM6	ENSG00000076003
MCM7	ENSG00000166508
MCOLN1	ENSG00000090674
MDH2	ENSG00000146701
MDM4	ENSG00000198625
MEAF6	ENSG00000163875
MED10	ENSG00000133398
MED12	ENSG00000184634
MED13	ENSG00000108510
MED24	ENSG00000008838
MEF2BNB-MEF2B	ENSG00000064489
MEGF8	ENSG00000105429
MESDC1	ENSG00000140406
MESDC2	ENSG00000117899
MET	ENSG00000105976
METAP2	ENSG00000111142
METRN	ENSG00000103260
METTL16	ENSG00000127804
METTL3	ENSG00000165819
MFN2	ENSG00000116688
MFSD1	ENSG00000118855
MFSD12	ENSG00000161091
MFSD2A	ENSG00000168389
MGAT1	ENSG00000131446
MGAT2	ENSG00000168282
MGAT4B	ENSG00000161013
MGAT5	ENSG00000152127
MIA3	ENSG00000154305
MIB1	ENSG00000101752
MIB2	ENSG00000197530
MICAL3	ENSG00000243156
MICU1	ENSG00000107745
MICU2	ENSG00000165487
MID1IP1	ENSG00000165175
MIDN	ENSG00000167470
MIF	ENSG00000240972
MINK1	ENSG00000141503
MKL1	ENSG00000196588
MKRN1	ENSG00000133606
MLLT3	ENSG00000171843
MLLT6	ENSG00000108292
MLST8	ENSG00000167965
MLTK	ENSG00000091436
MMP15	ENSG00000102996
MMS19	ENSG00000155229
MOB3A	ENSG00000172081
MOCOS	ENSG00000075643
MON1A	ENSG00000164077
MON2	ENSG00000061987
MOV10	ENSG00000155363
MPP6	ENSG00000105926
MPRIP	ENSG00000133030
MPST	ENSG00000128309
MROH1	ENSG00000179832
MRPL12	ENSG00000262814
MRPL17	ENSG00000158042
MRPL23	ENSG00000214026
MRPL24	ENSG00000143314
MRPL3	ENSG00000114686
MRPL34	ENSG00000130312
MRPL46	ENSG00000259494
MRPL53	ENSG00000204822
MRPS11	ENSG00000181991
MRPS15	ENSG00000116898
MRPS16	ENSG00000182180
MRPS17	ENSG00000249773
MRPS2	ENSG00000122140
MRPS22	ENSG00000175110
MRPS25	ENSG00000131368
MRPS7	ENSG00000125445
MSH5-SAPCD1	ENSG00000255152
MSL1	ENSG00000188895
MSN	ENSG00000147065
MSTO1	ENSG00000125459
MSTO2P	ENSG00000203761
MTAP	ENSG00000099810
MTCH1	ENSG00000137409
MTFP1	ENSG00000242114
MTG1	ENSG00000148824
MTHFD1L	ENSG00000120254
MTHFD2	ENSG00000065911
MTR	ENSG00000116984
MTSS1L	ENSG00000132613
MUS81	ENSG00000172732
MVB12A	ENSG00000141971
MVD	ENSG00000167508
MVP	ENSG00000013364
MXRA7	ENSG00000182534
MYBL2	ENSG00000101057
MYH3	ENSG00000109063
MYH9	ENSG00000100345
MYO10	ENSG00000145555
MYO18A	ENSG00000196535
MYO1E	ENSG00000157483
MYPOP	ENSG00000176182
NAA10	ENSG00000102030
NAA35	ENSG00000135040
NAA60	ENSG00000262621
NAAA	ENSG00000138744
NABP2	ENSG00000139579
NADSYN1	ENSG00000172890
NAP1L1	ENSG00000187109
NAP1L4	ENSG00000205531
NAPRT1	ENSG00000147813
NAT8L	ENSG00000185818
NBEAL1	ENSG00000144426
NBEAL2	ENSG00000160796
NBR1	ENSG00000188554
NCAPD2	ENSG00000010292
NCDN	ENSG00000020129
NCKIPSD	ENSG00000213672
NCOR1	ENSG00000141027
NCOR2	ENSG00000196498
NDUFA12	ENSG00000184752
NDUFA8	ENSG00000119421
NDUFB10	ENSG00000140990
NDUFB11	ENSG00000147123
NDUFB7	ENSG00000099795
NDUFB8	ENSG00000255339
NDUFB9	ENSG00000147684
NDUFS3	ENSG00000213619
NDUFS8	ENSG00000110717
NDUFV1	ENSG00000167792
NECAP2	ENSG00000157191
NEDD4L	ENSG00000049759
NEK4	ENSG00000114904
NEK7	ENSG00000151414
NELFB	ENSG00000188986
NELFCD	ENSG00000101158
NELFE	ENSG00000204356
NETO2	ENSG00000171208
NEU1	ENSG00000204386
NF2	ENSG00000186575
NFE2L1	ENSG00000082641
NFIC	ENSG00000141905
NFYA	ENSG00000001167
NFYB	ENSG00000120837
NID2	ENSG00000087303
NIPSNAP1	ENSG00000184117
NIT1	ENSG00000158793
NME1	ENSG00000239672
NOC2L	ENSG00000188976
NOL7	ENSG00000225921
NOL8	ENSG00000198000
NOMO2	ENSG00000185164
NOTCH1	ENSG00000148400
NPAS1	ENSG00000130751
NPAS2	ENSG00000170485
NPC2	ENSG00000119655
NPLOC4	ENSG00000182446
NR2C2	ENSG00000177463
NR3C1	ENSG00000113580
NRARP	ENSG00000198435
NSD1	ENSG00000165671
NSUN2	ENSG00000037474
NSUN5P2	ENSG00000106133
NT5C3B	ENSG00000141698
NT5DC2	ENSG00000168268
NUCB1	ENSG00000104805
NUDT19	ENSG00000213965
NUDT21	ENSG00000167005
NUDT5	ENSG00000165609
NUP188	ENSG00000095319
NUP205	ENSG00000155561
NUP210	ENSG00000132182
NUP43	ENSG00000120253
NUTF2	ENSG00000102898
NVL	ENSG00000143748
NXF1	ENSG00000162231
OCEL1	ENSG00000099330
ODC1	ENSG00000115758
OIP5-AS1	ENSG00000247556
ORMDL3	ENSG00000172057
OSBPL8	ENSG00000091039
OSGIN2	ENSG00000164823
OTUD5	ENSG00000068308
OXA1L	ENSG00000155463
OXLD1	ENSG00000204237
OXSR1	ENSG00000172939
P4HB	ENSG00000185624
PABPC1	ENSG00000070756
PABPC4	ENSG00000090621
PABPN1	ENSG00000100836
PACS2	ENSG00000179364
PAGR1	ENSG00000185928
PAIP1	ENSG00000172239
PAK2	ENSG00000180370
PAM	ENSG00000145730
PAM16	ENSG00000217930
PAN3	ENSG00000152520
PAPD7	ENSG00000112941
PAQR6	ENSG00000160781
PARD3	ENSG00000148498
PARP6	ENSG00000137817
PAWR	ENSG00000177425
PC	ENSG00000173599
PCBP2	ENSG00000197111
PCED1A	ENSG00000132635
PCK2	ENSG00000100889
PCM1	ENSG00000078674
PCNT	ENSG00000160299
PCNXL3	ENSG00000197136
PCOLCE	ENSG00000106333
PCSK6	ENSG00000140479
PCSK7	ENSG00000160613
PDAP1	ENSG00000106244
PDCD6	ENSG00000249915
PDDC1	ENSG00000177225
PDE7A	ENSG00000205268
PDHB	ENSG00000168291
PDIA3	ENSG00000167004
PDIA4	ENSG00000155660
PDLIM7	ENSG00000196923
PDS5A	ENSG00000121892
PDXK	ENSG00000160209
PDZD8	ENSG00000165650
PEA15	ENSG00000162734
PEF1	ENSG00000162517
PELP1	ENSG00000141456
PET100	ENSG00000229833
PEX26	ENSG00000215193
PFDN1	ENSG00000113068
PFDN2	ENSG00000143256
PFDN4	ENSG00000101132
PFKM	ENSG00000152556
PFN1	ENSG00000108518
PGAM1	ENSG00000171314
PGAP2	ENSG00000148985
PGK1	ENSG00000102144
PHAX	ENSG00000164902
PHB2	ENSG00000215021
PHF14	ENSG00000106443
PHF19	ENSG00000119403
PHF5A	ENSG00000100410
PHF8	ENSG00000172943
PHGDH	ENSG00000092621
PHLDA3	ENSG00000174307
PHYHD1	ENSG00000175287
PI4K2B	ENSG00000038210
PI4KA	ENSG00000241973
PI4KAP2	ENSG00000183506
PIEZO1	ENSG00000103335
PIGG	ENSG00000174227
PIGO	ENSG00000165282
PIGQ	ENSG00000007541
PIH1D1	ENSG00000104872
PIK3R2	ENSG00000105647
PIKFYVE	ENSG00000115020
PIM1	ENSG00000137193
PIM3	ENSG00000198355
PIP4K2B	ENSG00000141720
PITPNM1	ENSG00000110697
PJA1	ENSG00000181191
PKD1P5	ENSG00000254681
PKDCC	ENSG00000162878
PKM	ENSG00000067225
PLAT	ENSG00000104368
PLAUR	ENSG00000011422
PLCD3	ENSG00000161714
PLCG1	ENSG00000124181
PLD3	ENSG00000105223
PLEC	ENSG00000178209
PLEKHG4	ENSG00000196155
PLEKHH3	ENSG00000068137
PLEKHM1P	ENSG00000214176
PLEKHO1	ENSG00000023902
PLIN3	ENSG00000105355
PLOD2	ENSG00000152952
PLOD3	ENSG00000106397
PLXNA1	ENSG00000114554
PLXNA3	ENSG00000130827
PLXNB2	ENSG00000196576
PLXND1	ENSG00000004399
PMEPA1	ENSG00000124225
PMS2P3	ENSG00000127957
PNKD	ENSG00000127838
PNPLA2	ENSG00000177666
POFUT1	ENSG00000101346
POFUT2	ENSG00000186866
POLD2	ENSG00000106628
POLE	ENSG00000177084
POLE3	ENSG00000148229
POLM	ENSG00000122678
POLQ	ENSG00000051341
POLR2B	ENSG00000047315
POLR3E	ENSG00000058600
POMT2	ENSG00000009830
PPDPF	ENSG00000125534
PPIAP29	ENSG00000214975
PPIB	ENSG00000166794
PPIC	ENSG00000168938
PPIE	ENSG00000084072
PPIF	ENSG00000108179
PPM1F	ENSG00000100034
PPM1G	ENSG00000115241
PPME1	ENSG00000214517
PPP1CA	ENSG00000172531
PPP1CB	ENSG00000213639
PPP1R10	ENSG00000204569
PPP1R13L	ENSG00000104881
PPP1R14B	ENSG00000173457
PPP1R14BP3	ENSG00000179967
PPP1R26	ENSG00000196422
PPP1R35	ENSG00000160813
PPP1R37	ENSG00000104866
PPP2CA	ENSG00000113575
PPP2R3B	ENSG00000167393
PPP2R5B	ENSG00000068971
PPP2R5C	ENSG00000078304
PPP2R5D	ENSG00000112640
PPP6R1	ENSG00000105063
PRADC1	ENSG00000135617
PRDM4	ENSG00000110851
PRDX3	ENSG00000165672
PRDX5	ENSG00000126432
PRDX6	ENSG00000117592
PRICKLE3	ENSG00000012211
PRKCA	ENSG00000154229
PRKCZ	ENSG00000067606
PRKDC	ENSG00000253729
PRKRIR	ENSG00000137492
PRMT5	ENSG00000100462
PRNP	ENSG00000171867
PROSER1	ENSG00000120685
PRPF40B	ENSG00000110844
PRRC2A	ENSG00000204469
PRUNE	ENSG00000143363
PSAP	ENSG00000197746
PSIP1	ENSG00000164985
PSMA6	ENSG00000100902
PSMB1	ENSG00000008018
PSMB3	ENSG00000108294
PSMB5	ENSG00000100804
PSMD2	ENSG00000175166
PSMD3	ENSG00000108344
PSMD4	ENSG00000159352
PSMD8	ENSG00000099341
PSME3	ENSG00000131467
PSPH	ENSG00000146733
PTBP1	ENSG00000011304
PTEN	ENSG00000171862
PTGES2	ENSG00000148334
PTGES3	ENSG00000110958
PTMA	ENSG00000187514
PTMS	ENSG00000159335
PTP4A1	ENSG00000112245
PTPN11	ENSG00000179295
PTPN13	ENSG00000163629
PTPN4	ENSG00000088179
PTPRF	ENSG00000142949
PTPRK	ENSG00000152894
PTTG1IP	ENSG00000183255
PUF60	ENSG00000179950
PVR	ENSG00000073008
PVRL2	ENSG00000130202
PWP2	ENSG00000241945
PXDN	ENSG00000130508
PXN	ENSG00000089159
QARS	ENSG00000172053
QKI	ENSG00000112531
QPCTL	ENSG00000011478
QSOX1	ENSG00000116260
QSOX2	ENSG00000165661
R3HDM4	ENSG00000198858
RAB11FIP3	ENSG00000090565
RAB11FIP5	ENSG00000135631
RAB1B	ENSG00000174903
RAB2B	ENSG00000129472
RABGGTB	ENSG00000137955
RABL6	ENSG00000196642
RAC1P2	ENSG00000249936
RAD21	ENSG00000164754
RAD23A	ENSG00000179262
RADIL	ENSG00000157927
RALA	ENSG00000006451
RALY	ENSG00000125970
RANBP9	ENSG00000010017
RAPGEF1	ENSG00000107263
RASEF	ENSG00000165105
RAVER1	ENSG00000161847
RB1CC1	ENSG00000023287
RBBP8	ENSG00000101773
RBL1	ENSG00000080839
RBM14	ENSG00000239306
RBM15B	ENSG00000179837
RBM27	ENSG00000091009
RBM38	ENSG00000132819
RCC1	ENSG00000180198
RCC2	ENSG00000179051
RCCD1	ENSG00000166965
RCN1	ENSG00000049449
RCOR1	ENSG00000089902
REEP4	ENSG00000168476
REEP6	ENSG00000115255
REPIN1	ENSG00000214022
RERE	ENSG00000142599
RFC2	ENSG00000049541
RFT1	ENSG00000163933
RFX1	ENSG00000132005
RFX2	ENSG00000087903
RFX5	ENSG00000143390
RGMB	ENSG00000174136
RHBDD1	ENSG00000144468
RHOA	ENSG00000067560
RHOB	ENSG00000143878
RHOBTB3	ENSG00000164292
RHOF	ENSG00000139725
RHOT2	ENSG00000140983
RMI2	ENSG00000175643
RMND5B	ENSG00000145916
RNASEH2A	ENSG00000104889
RNF11	ENSG00000123091
RNF115	ENSG00000121848
RNF126	ENSG00000070423
RNF130	ENSG00000113269
RNF138	ENSG00000134758
RNF167	ENSG00000108523
RNF169	ENSG00000166439
RNF213	ENSG00000173821
RNF4	ENSG00000063978
ROCK1	ENSG00000067900
RP1-241P17.4	ENSG00000228532
RP11-100N21.1	ENSG00000242262
RP11-121L10.3	ENSG00000214391
RP11-12M9.3	ENSG00000237214
RP11-343N15.5	ENSG00000269996
RP11-3P17.3	ENSG00000234851
RP11-464D20.2	ENSG00000239246
RP11-475C16.1	ENSG00000218426
RP11-514P8.6	ENSG00000205236
RP11-543P15.1	ENSG00000227081
RP11-556K13.1	ENSG00000183298
RP11-561C5.4	ENSG00000229212
RP11-592N21.1	ENSG00000212664
RP11-641D5.1	ENSG00000213178
RP11-69L16.5	ENSG00000220472
RP11-778D9.4	ENSG00000228205
RP11-887P2.3	ENSG00000186076
RP11-889L3.1	ENSG00000218227
RP11-958N24.2	ENSG00000227827
RP4-706A16.3	ENSG00000226084
RP5-857K21.4	ENSG00000230021
RP6-105D16.1	ENSG00000214016
RPL11	ENSG00000142676
RPL12	ENSG00000197958
RPL12P4	ENSG00000185834
RPL13	ENSG00000167526
RPL13AP5	ENSG00000236552
RPL14	ENSG00000188846
RPL15	ENSG00000174748
RPL18A	ENSG00000105640
RPL23A	ENSG00000198242
RPL24P4	ENSG00000181524
RPL26	ENSG00000161970
RPL26L1	ENSG00000037241
RPL27	ENSG00000131469
RPL27A	ENSG00000166441
RPL28	ENSG00000108107
RPL29	ENSG00000162244
RPL3	ENSG00000100316
RPL30	ENSG00000156482
RPL31	ENSG00000071082
RPL32	ENSG00000144713
RPL35	ENSG00000136942
RPL35P2	ENSG00000220583
RPL36	ENSG00000130255
RPL37	ENSG00000145592
RPL38	ENSG00000172809
RPL4	ENSG00000174444
RPL5	ENSG00000122406
RPL6	ENSG00000089009
RPL7	ENSG00000147604
RPL7A	ENSG00000148303
RPL7AP30	ENSG00000241741
RPL8	ENSG00000161016
RPLP0P6	ENSG00000213553
RPPH1	ENSG00000259001
RPRD2	ENSG00000163125
RPS10	ENSG00000124614
RPS11	ENSG00000142534
RPS13	ENSG00000110700
RPS15	ENSG00000115268
RPS17	ENSG00000184779
RPS17L	ENSG00000182774
RPS19	ENSG00000105372
RPS2	ENSG00000140988
RPS20	ENSG00000008988
RPS23	ENSG00000186468
RPS25	ENSG00000118181
RPS27L	ENSG00000185088
RPS28	ENSG00000233927
RPS29	ENSG00000213741
RPS2P5	ENSG00000240342
RPS2P55	ENSG00000216866
RPS3	ENSG00000149273
RPS5	ENSG00000083845
RPS6	ENSG00000137154
RPS6KB2	ENSG00000175634
RPS7	ENSG00000171863
RPS9	ENSG00000170889
RPSA	ENSG00000168028
RPSAP15	ENSG00000237506
RPSAP58	ENSG00000205246
RRAS	ENSG00000126458
RRAS2	ENSG00000133818
RREB1	ENSG00000124782
RRP12	ENSG00000052749
RTN3	ENSG00000133318
RXRB	ENSG00000204231
RYK	ENSG00000163785
S100A10	ENSG00000197747
SAFB2	ENSG00000130254
SAMD1	ENSG00000141858
SAMD11	ENSG00000187634
SAPCD2	ENSG00000186193
SARM1	ENSG00000004139
SARS	ENSG00000031698
SART1	ENSG00000175467
SATB2	ENSG00000119042
SCAI	ENSG00000173611
SCAP	ENSG00000114650
SCARB1	ENSG00000073060
SCD	ENSG00000099194
SCMH1	ENSG00000010803
SCO1	ENSG00000133028
SCRIB	ENSG00000180900
SCYL1	ENSG00000142186
SDCCAG3	ENSG00000165689
SDF4	ENSG00000078808
SDHA	ENSG00000073578
SDHAF1	ENSG00000205138
SDHC	ENSG00000143252
SEC11A	ENSG00000140612
SEC13	ENSG00000157020
SEC16A	ENSG00000148396
SEC24B	ENSG00000138802
SEC24C	ENSG00000176986
SEC31A	ENSG00000138674
SEMA4D	ENSG00000187764
SEPW1	ENSG00000178980
SERBP1	ENSG00000142864
SERINC3	ENSG00000132824
SERP1	ENSG00000120742
SERPINB6	ENSG00000124570
SERPINH1	ENSG00000149257
SESN3	ENSG00000149212
SET	ENSG00000119335
SETD1A	ENSG00000099381
SETD8	ENSG00000183955
SETP14	ENSG00000240489
SEZ6L2	ENSG00000174938
SF1	ENSG00000168066
SF3B1	ENSG00000115524
SF3B2	ENSG00000087365
SF3B5	ENSG00000169976
SFI1	ENSG00000198089
SFPQ	ENSG00000116560
SFXN1	ENSG00000164466
SFXN3	ENSG00000107819
SGPP1	ENSG00000126821
SGTB	ENSG00000197860
SH3BP5	ENSG00000131370
SH3KBP1	ENSG00000147010
SH3PXD2A	ENSG00000107957
SHB	ENSG00000107338
SHC1	ENSG00000160691
SHCBP1	ENSG00000171241
SHMT2	ENSG00000182199
SHPK	ENSG00000262304
SIK1	ENSG00000142178
SKP1	ENSG00000113558
SLAIN2	ENSG00000109171
SLC1A5	ENSG00000105281
SLC25A23	ENSG00000125648
SLC25A39	ENSG00000013306
SLC25A6	ENSG00000169100
SLC27A4	ENSG00000167114
SLC2A11	ENSG00000133460
SLC35A4	ENSG00000176087
SLC35B4	ENSG00000205060
SLC35C1	ENSG00000181830
SLC35C2	ENSG00000080189
SLC35F5	ENSG00000115084
SLC35F6	ENSG00000213699
SLC39A1	ENSG00000143570
SLC39A14	ENSG00000104635
SLC3A2	ENSG00000168003
SLC46A1	ENSG00000076351
SLC4A1AP	ENSG00000163798
SLC4A2	ENSG00000164889
SLC6A8	ENSG00000130821
SLC7A5	ENSG00000103257
SLX4	ENSG00000188827
SMAD3	ENSG00000166949
SMARCA4	ENSG00000127616
SMARCB1	ENSG00000099956
SMARCD2	ENSG00000108604
SMC1A	ENSG00000072501
SMG1	ENSG00000157106
SMG5	ENSG00000198952
SMOX	ENSG00000088826
SNRNP200	ENSG00000144028
SNRPB	ENSG00000125835
SNRPD1	ENSG00000167088
SNRPE	ENSG00000182004
SNRPG	ENSG00000143977
SNTA1	ENSG00000101400
SNX15	ENSG00000110025
SNX17	ENSG00000115234
SNX18	ENSG00000178996
SOGA2	ENSG00000168502
SP3	ENSG00000172845
SPAST	ENSG00000021574
SPATA2L	ENSG00000158792
SPATC1L	ENSG00000160284
SPEN	ENSG00000065526
SPG7	ENSG00000197912
SPHK1	ENSG00000176170
SPIRE2	ENSG00000204991
SPNS1	ENSG00000169682
SPPL2B	ENSG00000005206
SPPL3	ENSG00000157837
SPTBN1	ENSG00000115306
SPTBN2	ENSG00000173898
SPTBN4	ENSG00000160460
SQSTM1	ENSG00000161011
SRP68	ENSG00000167881
SRP9	ENSG00000143742
SRPRB	ENSG00000144867
SRRT	ENSG00000087087
SRSF1	ENSG00000136450
SRSF11	ENSG00000116754
SRSF5	ENSG00000100650
SRSF6	ENSG00000124193
SRSF7	ENSG00000115875
SS18L1	ENSG00000184402
SS18L2	ENSG00000008324
SSBP4	ENSG00000130511
SSFA2	ENSG00000138434
SSR1	ENSG00000124783
SSR3	ENSG00000114850
SSR4	ENSG00000180879
SSRP1	ENSG00000149136
ST13P4	ENSG00000232150
ST6GALNAC4	ENSG00000136840
STAT5B	ENSG00000173757
STAU1	ENSG00000124214
STC2	ENSG00000113739
STIP1	ENSG00000168439
STK32C	ENSG00000165752
STRAP	ENSG00000023734
STRN4	ENSG00000090372
STT3B	ENSG00000163527
STUB1	ENSG00000103266
STX12	ENSG00000117758
STX16	ENSG00000124222
STXBP3	ENSG00000116266
SUDS3	ENSG00000111707
SULF2	ENSG00000196562
SUMF2	ENSG00000129103
SUMO1	ENSG00000116030
SUPT6H	ENSG00000109111
SUPT7L	ENSG00000119760
SYAP1	ENSG00000169895
SYNE2	ENSG00000054654
SYNRG	ENSG00000006114
SYT7	ENSG00000011347
SYVN1	ENSG00000162298
TACO1	ENSG00000136463
TADA3	ENSG00000171148
TAF10	ENSG00000166337
TAF13	ENSG00000197780
TAF15	ENSG00000172660
TAF1C	ENSG00000103168
TAF4	ENSG00000130699
TAF7	ENSG00000178913
TAGLN2	ENSG00000158710
TALDO1	ENSG00000177156
TAOK2	ENSG00000149930
TAP1	ENSG00000168394
TAP2	ENSG00000250264
TARBP2	ENSG00000139546
TARDBP	ENSG00000120948
TARS	ENSG00000113407
TBC1D12	ENSG00000108239
TBC1D4	ENSG00000136111
TBCA	ENSG00000171530
TBKBP1	ENSG00000198933
TBL1X	ENSG00000101849
TBRG4	ENSG00000136270
TBX1	ENSG00000184058
TCEA1P2	ENSG00000230409
TCEB2	ENSG00000103363
TCF25	ENSG00000141002
TCF3	ENSG00000071564
TCFL5	ENSG00000101190
TCOF1	ENSG00000070814
TCP1	ENSG00000120438
TCP11L1	ENSG00000176148
TDRKH	ENSG00000182134
TEAD1	ENSG00000187079
TECPR1	ENSG00000205356
TECR	ENSG00000099797
TERF1	ENSG00000147601
TESK2	ENSG00000070759
TFDP1	ENSG00000198176
TFRC	ENSG00000072274
TGFB1	ENSG00000105329
TGIF1	ENSG00000177426
TGOLN2	ENSG00000152291
THAP11	ENSG00000168286
THEM4	ENSG00000159445
THOC7	ENSG00000163634
THOP1	ENSG00000172009
TICRR	ENSG00000140534
TIMM8A	ENSG00000126953
TIPIN	ENSG00000075131
TJAP1	ENSG00000137221
TK1	ENSG00000167900
TLE2	ENSG00000065717
TLE3	ENSG00000140332
TM9SF4	ENSG00000101337
TMED9	ENSG00000184840
TMEM106C	ENSG00000134291
TMEM109	ENSG00000110108
TMEM115	ENSG00000126062
TMEM127	ENSG00000135956
TMEM131	ENSG00000075568
TMEM160	ENSG00000130748
TMEM165	ENSG00000134851
TMEM19	ENSG00000139291
TMEM201	ENSG00000188807
TMEM205	ENSG00000105518
TMEM209	ENSG00000146842
TMEM219	ENSG00000149932
TMEM245	ENSG00000106771
TMEM43	ENSG00000170876
TMEM5	ENSG00000118600
TMEM55B	ENSG00000165782
TMEM64	ENSG00000180694
TMEM98	ENSG00000006042
TMPO	ENSG00000120802
TMSB10	ENSG00000034510
TNFRSF1A	ENSG00000067182
TNKS2	ENSG00000107854
TNPO1	ENSG00000083312
TNRC6A	ENSG00000090905
TOB1	ENSG00000141232
TOMM20	ENSG00000173726
TOP1MT	ENSG00000184428
TOP2A	ENSG00000131747
TOP3A	ENSG00000177302
TPM1	ENSG00000140416
TPM3	ENSG00000143549
TPP2	ENSG00000134900
TPRN	ENSG00000176058
TRAF4	ENSG00000076604
TRAF7	ENSG00000131653
TRAM1	ENSG00000067167
TRAP1	ENSG00000126602
TRAPPC5	ENSG00000181029
TRIB3	ENSG00000101255
TRIM24	ENSG00000122779
TRIM28	ENSG00000130726
TRIM37	ENSG00000108395
TRIM8	ENSG00000171206
TRIO	ENSG00000038382
TRIP6	ENSG00000087077
TRMT1	ENSG00000104907
TRPT1	ENSG00000149743
TSC22D1	ENSG00000102804
TSG101	ENSG00000074319
TSN	ENSG00000211460
TSPAN4	ENSG00000214063
TSPO	ENSG00000100300
TSTA3	ENSG00000104522
TTL	ENSG00000114999
TTLL5	ENSG00000119685
TTYH3	ENSG00000136295
TUBA1B	ENSG00000123416
TUBA4A	ENSG00000127824
TUBB	ENSG00000196230
TUBB4B	ENSG00000188229
TUBGCP2	ENSG00000130640
TUBGCP6	ENSG00000128159
TUFM	ENSG00000178952
TXN	ENSG00000136810
TXN2	ENSG00000100348
TXNDC5	ENSG00000239264
TXNRD1	ENSG00000198431
TYSND1	ENSG00000156521
U2AF2	ENSG00000063244
UBA1	ENSG00000130985
UBALD1	ENSG00000153443
UBB	ENSG00000170315
UBE2Q2	ENSG00000140367
UBE2S	ENSG00000108106
UBE2Z	ENSG00000159202
UBE3C	ENSG00000009335
UBL7	ENSG00000138629
UBQLN4	ENSG00000160803
UBR4	ENSG00000127481
UBXN2A	ENSG00000173960
UBXN6	ENSG00000167671
UCP2	ENSG00000175567
UFD1L	ENSG00000070010
UGGT1	ENSG00000136731
UHRF1	ENSG00000034063
UHRF2	ENSG00000147854
UIMC1	ENSG00000087206
ULK2	ENSG00000083290
UNC119	ENSG00000109103
UNC5B	ENSG00000107731
UNK	ENSG00000132478
UNKL	ENSG00000059145
UPF1	ENSG00000005007
UQCRB	ENSG00000156467
UQCRFS1	ENSG00000169021
UQCRFS1P1	ENSG00000226085
URI1	ENSG00000105176
URM1	ENSG00000167118
USF2	ENSG00000105698
USP11	ENSG00000102226
USP15	ENSG00000135655
USP19	ENSG00000172046
USP22	ENSG00000124422
USP24	ENSG00000162402
USP34	ENSG00000115464
USP48	ENSG00000090686
USP5	ENSG00000111667
UVRAG	ENSG00000198382
VARS	ENSG00000204394
VASP	ENSG00000125753
VAT1	ENSG00000108828
VCL	ENSG00000035403
VPS25	ENSG00000131475
VPS26B	ENSG00000151502
VPS35	ENSG00000069329
VPS4A	ENSG00000132612
VWA9	ENSG00000138614
WARS	ENSG00000140105
WASL	ENSG00000106299
WBSCR16	ENSG00000174374
WDR13	ENSG00000101940
WDR27	ENSG00000184465
WDR45	ENSG00000196998
WDR45B	ENSG00000141580
WDR61	ENSG00000140395
WDR90	ENSG00000161996
WIZ	ENSG00000011451
WNK1	ENSG00000060237
WRAP73	ENSG00000116213
XBP1	ENSG00000100219
XPO5	ENSG00000124571
XRCC1	ENSG00000073050
XRCC5	ENSG00000079246
XRCC6	ENSG00000196419
XYLT2	ENSG00000015532
YAP1	ENSG00000137693
YARS	ENSG00000134684
YBX1P1	ENSG00000224861
YBX3	ENSG00000060138
YIPF4	ENSG00000119820
YTHDC2	ENSG00000047188
YTHDF1	ENSG00000149658
YWHAE	ENSG00000108953
YWHAZ	ENSG00000164924
YY1	ENSG00000100811
ZBED1	ENSG00000214717
ZBTB2	ENSG00000181472
ZC3H14	ENSG00000100722
ZC3H18	ENSG00000158545
ZC3HAV1	ENSG00000105939
ZDHHC2	ENSG00000104219
ZDHHC8	ENSG00000099904
ZDHHC9	ENSG00000188706
ZFPL1	ENSG00000162300
ZFYVE20	ENSG00000131381
ZFYVE26	ENSG00000072121
ZKSCAN2	ENSG00000155592
ZMIZ1	ENSG00000108175
ZMIZ2	ENSG00000122515
ZMYM4	ENSG00000146463
ZNF106	ENSG00000103994
ZNF131	ENSG00000172262
ZNF146	ENSG00000167635
ZNF219	ENSG00000165804
ZNF275	ENSG00000063587
ZNF281	ENSG00000162702
ZNF362	ENSG00000160094
ZNF385A	ENSG00000161642
ZNF581	ENSG00000171425
ZNF584	ENSG00000171574
ZNF629	ENSG00000102870
ZNF639	ENSG00000121864
ZNF655	ENSG00000197343
ZNF692	ENSG00000171163
ZNF703	ENSG00000183779
ZNF707	ENSG00000181135
ZNF746	ENSG00000181220
ZNF800	ENSG00000048405
ZNFX1	ENSG00000124201
ZSCAN20	ENSG00000121903
ZSWIM6	ENSG00000130449
ZSWIM8	ENSG00000214655
ZWINT	ENSG00000122952
ZYG11A	ENSG00000203995
ZYX	ENSG00000159840

## Sheet: Overlapped genes with Zhang
Supplementary file 3c. Overlapped genes with Zhang et al.
Gene Symbol	Ensembl ID
ABHD14B	ENSG00000114779
ABHD17A	ENSG00000129968
ACAD10	ENSG00000111271
ADAM11	ENSG00000073670
ADCK4	ENSG00000123815
ADCY1	ENSG00000164742
AGO1	ENSG00000092847
AKT2	ENSG00000105221
ALDH16A1	ENSG00000161618
AMH	ENSG00000104899
ANGEL1	ENSG00000013523
APBB3	ENSG00000113108
ARHGEF25	ENSG00000240771
ARID1A	ENSG00000117713
ARL6IP4	ENSG00000182196
ATG16L1	ENSG00000085978
ATP5SL	ENSG00000105341
B9D1	ENSG00000108641
BAG6	ENSG00000204463
BBS4	ENSG00000140463
BCOR	ENSG00000183337
BNIP3	ENSG00000176171
BPNT1	ENSG00000162813
BUB3	ENSG00000154473
C19orf70	ENSG00000174917
CABIN1	ENSG00000099991
CALM3	ENSG00000160014
CAMK2N1	ENSG00000162545
CCDC167	ENSG00000198937
CDIP1	ENSG00000089486
CDK5RAP3	ENSG00000108465
CEP170B	ENSG00000099814
CHCHD10	ENSG00000250479
CHD3	ENSG00000170004
CINP	ENSG00000100865
CITED1	ENSG00000125931
CLPTM1	ENSG00000104853
COL18A1	ENSG00000182871
COL4A1	ENSG00000187498
COL4A5	ENSG00000188153
COMMD1	ENSG00000173163
CS	ENSG00000062485
CSDE1	ENSG00000009307
CTSA	ENSG00000064601
CTSD	ENSG00000117984
CUX1	ENSG00000257923
CXorf40A	ENSG00000197620
DBNL	ENSG00000136279
DDAH2	ENSG00000213722
DESI1	ENSG00000100418
DFFB	ENSG00000169598
DGCR8	ENSG00000128191
DHRS7	ENSG00000100612
DHX33	ENSG00000005100
DNAJC30	ENSG00000176410
DYNC1H1	ENSG00000197102
E2F5	ENSG00000133740
EDC3	ENSG00000179151
EEF1D	ENSG00000104529
EHD4	ENSG00000103966
EHMT1	ENSG00000181090
EIF2S3	ENSG00000130741
EIF4B	ENSG00000063046
EIF4BP6	ENSG00000197258
ELAC2	ENSG00000006744
ENGASE	ENSG00000167280
EP400	ENSG00000183495
EPHB4	ENSG00000196411
ETF1	ENSG00000120705
EVI5L	ENSG00000142459
EXD2	ENSG00000081177
EXO1	ENSG00000174371
EXOC7	ENSG00000182473
FAM107B	ENSG00000065809
FAM129B	ENSG00000136830
FANCA	ENSG00000187741
FBXL6	ENSG00000182325
FBXW9	ENSG00000132004
FGD1	ENSG00000102302
FGFR4	ENSG00000160867
FKBP10	ENSG00000141756
FURIN	ENSG00000140564
FYN	ENSG00000010810
GINS4	ENSG00000147536
GIPC1	ENSG00000123159
GLB1	ENSG00000170266
GNAS	ENSG00000087460
GPR137	ENSG00000173264
GRB2	ENSG00000177885
GTF2I	ENSG00000077809
HDGF	ENSG00000143321
HDLBP	ENSG00000115677
HOXB7	ENSG00000260027
HYI	ENSG00000178922
IARS	ENSG00000196305
IFT27	ENSG00000100360
IGBP1	ENSG00000089289
INTS1	ENSG00000164880
INTS3	ENSG00000143624
KIF5B	ENSG00000170759
KLC2	ENSG00000174996
KPTN	ENSG00000118162
KREMEN1	ENSG00000183762
LARP4B	ENSG00000107929
LDLR	ENSG00000130164
LEPRE1	ENSG00000117385
LMAN1	ENSG00000074695
LONP2	ENSG00000102910
LRCH3	ENSG00000186001
LZTS2	ENSG00000107816
MACF1	ENSG00000127603
MAP2K1	ENSG00000169032
MAPK12	ENSG00000188130
MAPK3	ENSG00000102882
MARCKSL1	ENSG00000175130
MCFD2	ENSG00000180398
MED12	ENSG00000184634
MLLT3	ENSG00000171843
MMS19	ENSG00000155229
MRPS25	ENSG00000131368
MVD	ENSG00000167508
NBEAL2	ENSG00000160796
NCDN	ENSG00000020129
NCOR1	ENSG00000141027
NDUFB7	ENSG00000099795
NELFB	ENSG00000188986
NME1-NME2	ENSG00000243678
NPLOC4	ENSG00000182446
NSUN5P1	ENSG00000223705
NSUN5P2	ENSG00000106133
NT5DC2	ENSG00000168268
NUDT3	ENSG00000272325
NUP210	ENSG00000132182
OGFOD3	ENSG00000181396
OSBPL8	ENSG00000091039
PABPC1	ENSG00000070756
PAK2	ENSG00000180370
PAN2	ENSG00000135473
PC	ENSG00000173599
PCNT	ENSG00000160299
PCSK7	ENSG00000160613
PEF1	ENSG00000162517
PET100	ENSG00000229833
PEX5	ENSG00000139197
PHF14	ENSG00000106443
PIGG	ENSG00000174227
PIK3R2	ENSG00000105647
PIP4K2B	ENSG00000141720
PLCG1	ENSG00000124181
PLD3	ENSG00000105223
PLTP	ENSG00000100979
PNPLA2	ENSG00000177666
POLE	ENSG00000177084
POLR2A	ENSG00000181222
PPM1G	ENSG00000115241
PPP6R2	ENSG00000100239
PPT2-EGFL8	ENSG00000258388
PRKCZ	ENSG00000067606
PTDSS2	ENSG00000174915
PTPN13	ENSG00000163629
PTPRF	ENSG00000142949
PVRL2	ENSG00000130202
PWP2	ENSG00000241945
PXDN	ENSG00000130508
QARS	ENSG00000172053
RAB15	ENSG00000139998
RABL6	ENSG00000196642
RALA	ENSG00000006451
RALGDS	ENSG00000160271
RCN1	ENSG00000049449
REEP6	ENSG00000115255
RMI2	ENSG00000175643
RP11-778D9.4	ENSG00000228205
RPPH1	ENSG00000259001
RPS2	ENSG00000140988
RPS29	ENSG00000213741
RPS2P5	ENSG00000240342
RPS2P55	ENSG00000216866
RPS6KB2	ENSG00000175634
RPSA	ENSG00000168028
RPSAP15	ENSG00000237506
RPSAP58	ENSG00000205246
RTN3	ENSG00000133318
SAMD11	ENSG00000187634
SCMH1	ENSG00000010803
SCO1	ENSG00000133028
SCRN1	ENSG00000136193
SEPN1	ENSG00000162430
SFI1	ENSG00000198089
SH3BP5	ENSG00000131370
SHPK	ENSG00000262304
SLC10A3	ENSG00000126903
SLC22A23	ENSG00000137266
SLC25A39	ENSG00000013306
SLC25A6	ENSG00000169100
SLC35B4	ENSG00000205060
SMG7	ENSG00000116698
SNRNP200	ENSG00000144028
SPG21	ENSG00000090487
SPG7	ENSG00000197912
SRRT	ENSG00000087087
STK32C	ENSG00000165752
SUDS3	ENSG00000111707
SZRD1	ENSG00000055070
TADA2A	ENSG00000108264
TAP1	ENSG00000168394
TARBP2	ENSG00000139546
TIMM50	ENSG00000105197
TIPIN	ENSG00000075131
TJAP1	ENSG00000137221
TMEM138	ENSG00000149483
TMEM219	ENSG00000149932
TRAF7	ENSG00000131653
TSR1	ENSG00000167721
TTLL3	ENSG00000214021
TUBGCP6	ENSG00000128159
USP22	ENSG00000124422
UVRAG	ENSG00000198382
WDR54	ENSG00000005448
WIZ	ENSG00000011451
XYLT2	ENSG00000015532
YY1	ENSG00000100811
ZC3H18	ENSG00000158545
ZC3H7B	ENSG00000100403
ZDHHC8	ENSG00000099904
ZNF3	ENSG00000166526
ZNF692	ENSG00000171163
