# Supplementary figures and images for: Transcriptome-wide identification of 5-methylcytosine by deaminase and reader protein-assisted sequencing
Source: eLife journal article supplement (doi:10.7554/elife.98166), 2024-06-11

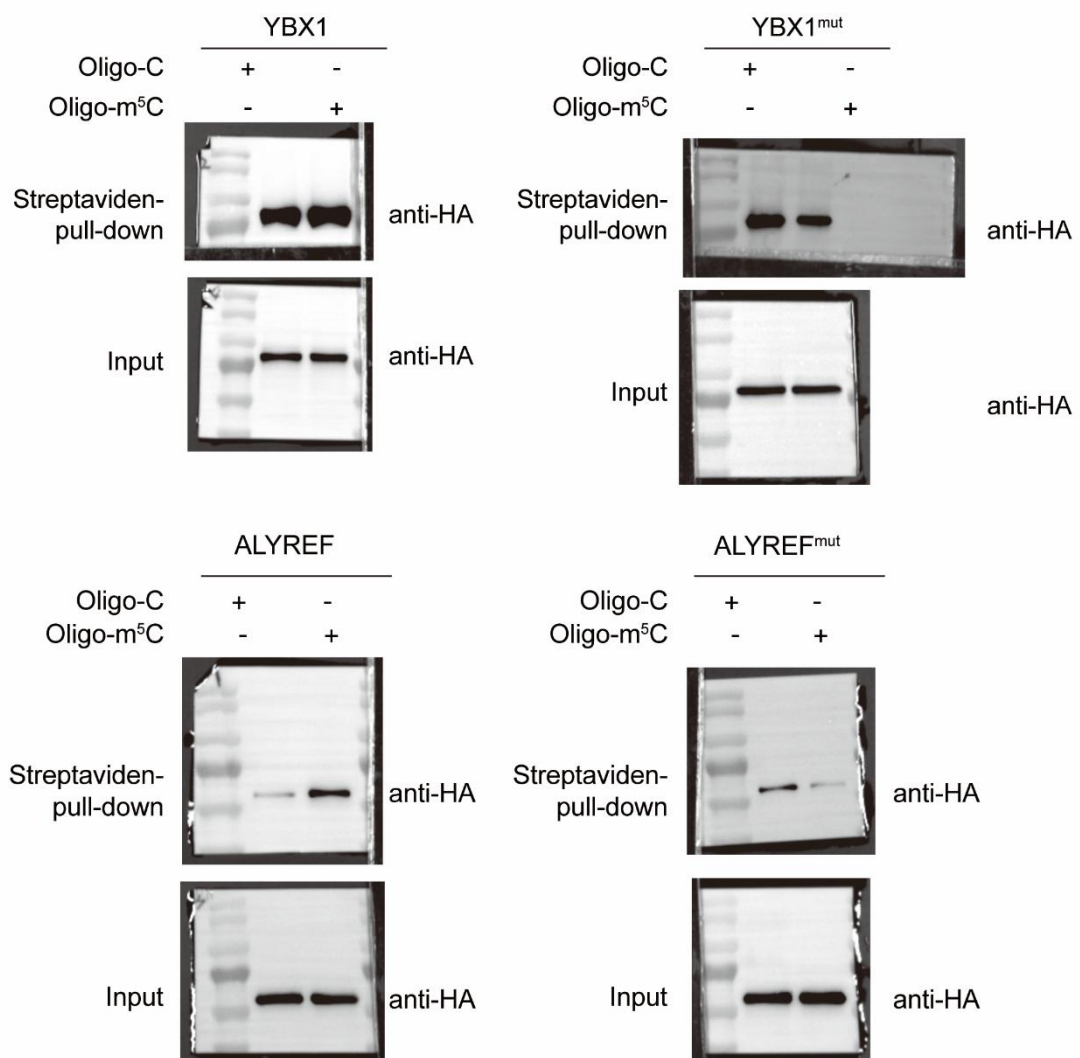

Supplement: fig1-figsupp1-data1 [file elife-98166-fig1-figsupp1-data1-v1.zip]

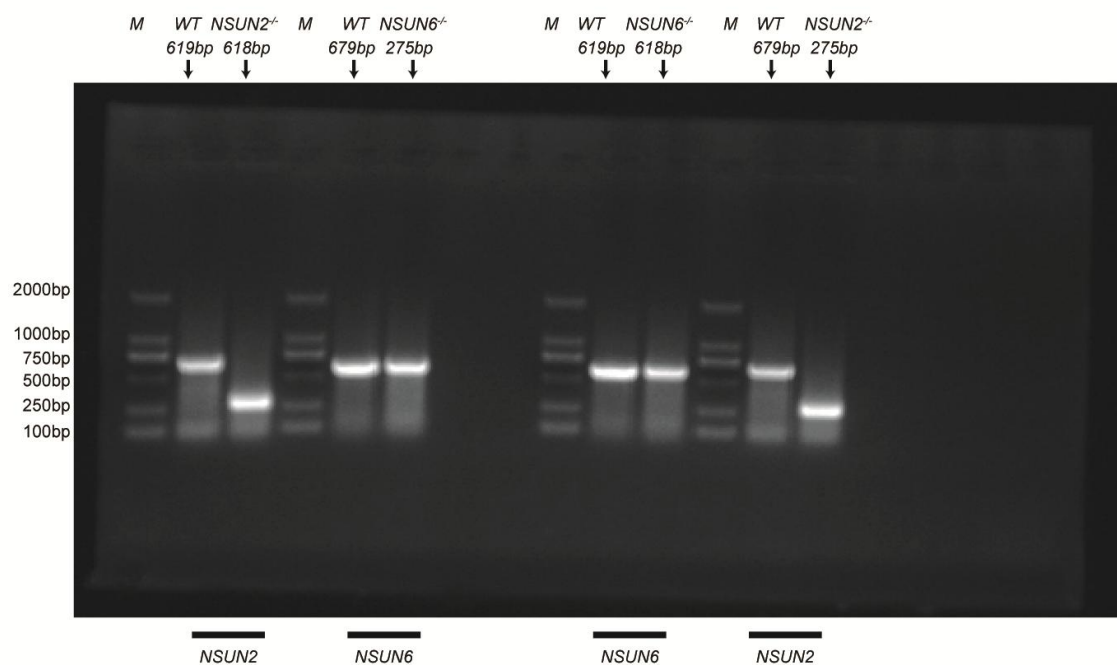

Supplement: fig2-figsupp3-data1 [file elife-98166-fig2-figsupp3-data1-v1.zip]

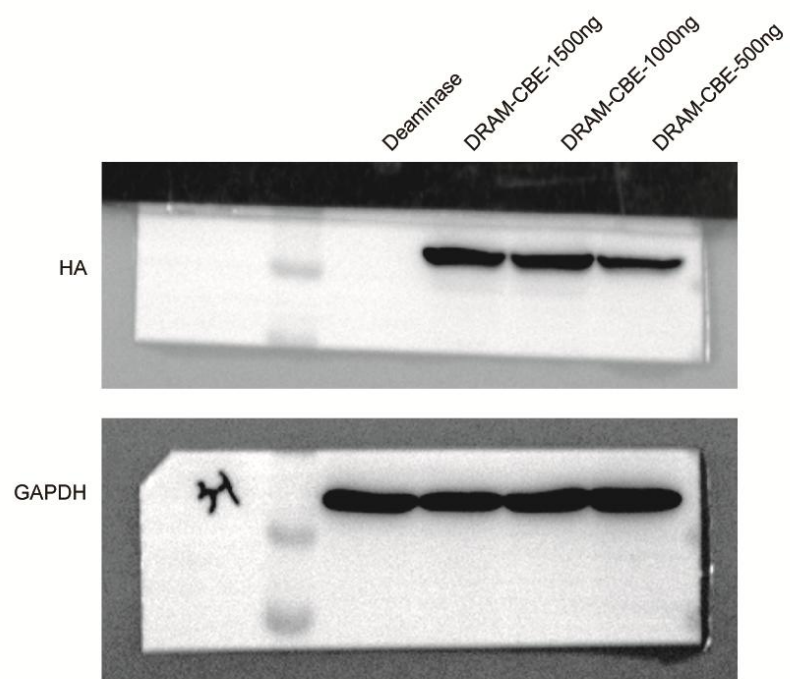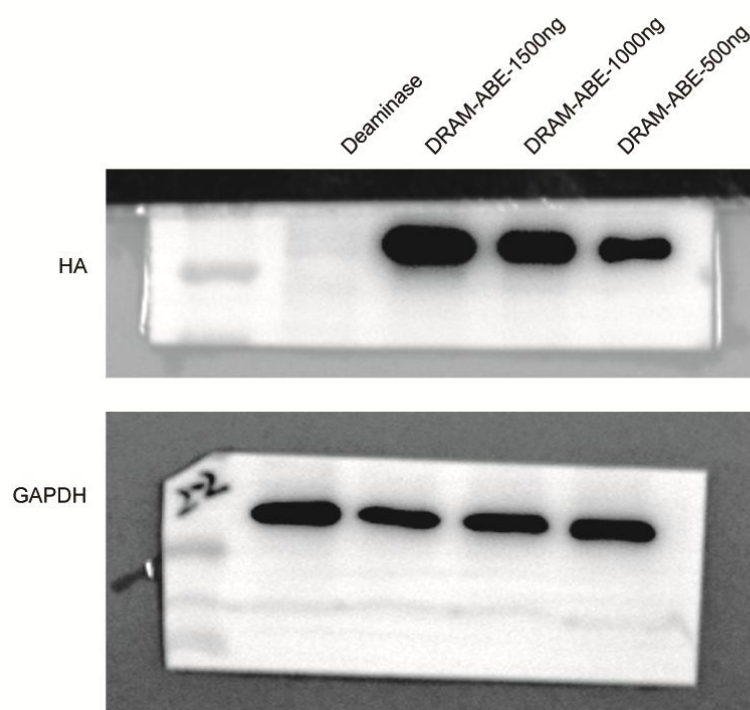

Supplement: fig5-data1 [file elife-98166-fig5-data1-v1.zip]
